# Supplementary material for: Organocatalytic enantioselective Mannich reaction of isoxazol-5(4H)-ones to isatin-derived ketimines
Source: Royal Society of Chemistry journal article supplement (doi:10.1039/d2ob01692c), 2022-01-01
Supplement: d2ob01692c1.pdf [file d2ob01692c1.pdf]

## Organocatalytic Enantioselective Mannich Reaction of Isoxazol-5(4*H*)-ones to Isatin-derived Ketimines

Ricardo Torán, Dario Puchán, Amparo Sanz-Marco, Carlos Vila, Jose R. Pedro, Gonzalo Blay\*

Departament de Química Orgànica, Facultat de Química, Universitat de València, 46100-Burjassot, Spain.

E-mail: [gonzalo.blay@uv.es](mailto:gonzalo.blay@uv.es)

|                                                                                                                                         |         |
|-----------------------------------------------------------------------------------------------------------------------------------------|---------|
| Materials and methods                                                                                                                   | S2      |
| General procedure for the enantioselective Mannich reaction                                                                             | S2      |
| Characterization data for compounds <b>3</b>                                                                                            | S3-S14  |
| Synthesis of compound <b>3aa</b> at 1 mmol scale                                                                                        | S15     |
| Synthesis of <i>tert</i> -butyl (1-benzyl-3-(4-fluoro-5-oxo-3-phenyl-4,5-dihydroisoxazol-4-yl)-2-oxoindolin-3-yl)carbamate ( <b>4</b> ) | S15     |
| Synthesis of <i>tert</i> -butyl ( <i>S</i> )-(1-benzyl-2-oxo-3-(2-oxo-2-phenylethyl)indolin-3-yl)carbamate ( <b>5</b> )                 | S16     |
| NMR spectra for compounds <b>3-5</b>                                                                                                    | S17-S41 |
| HPLC traces for compounds <b>3-5</b>                                                                                                    | S42-S66 |
| Absolute configuration analysis                                                                                                         | S67-S68 |
| References                                                                                                                              | S68     |

## Materials and methods

All reagents were purchased from commercial suppliers and used without further purification. All solvents employed in the reactions were distilled from appropriate drying agents prior to use. Reactions were monitored by TLC analysis using Merck Silica Gel 60 F-254 thin layer plates. Flash column chromatography was performed on Merck silica gel 60, 0.040-0.063 mm. Melting points were determined in capillary tubes. NMR spectra were run at 300 MHz for  $^1\text{H}$  and at 75 MHz for  $^{13}\text{C}$  NMR using residual nondeuterated solvent ( $\text{CHCl}_3$ ) as internal standard ( $\delta$  7.26 and 77.0 ppm, respectively). Chemical shifts are given in ppm. The carbon type was determined by DEPT experiments. High resolution mass spectra (ESI) were recorded on a Q-TOF spectrometer equipped with an electrospray source with a capillary voltage of 3.3 kV (ESI). Specific optical rotations were measured using sodium light (D line 589 nm). Chiral HPLC analyses were performed in a chromatograph equipped with a UV diode-array detector using chiral stationary phase columns from Daicel or Phenomenex.

*N*-Boc isatin ketimines,<sup>[1]</sup> isoxazol-5-ones,<sup>[2-4]</sup> and squaramide **IV**<sup>[5]</sup> were prepared according to the previous literature.

### General procedure for the enantioselective Mannich reaction

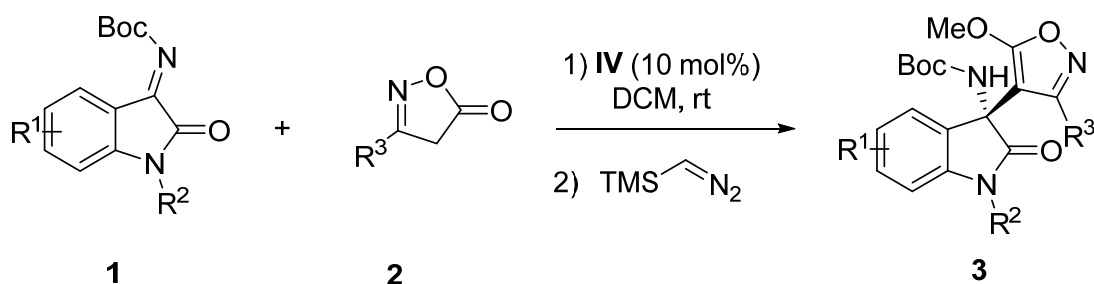

An oven dried test tube was charged with isatin ketimine **1** (0.2 mmol), isoxazol-5-one **2** (0.2 mmol) and squaramide **IV** (12.0 mg, 0.02 mmol). The test tube was purged with  $\text{N}_2$  10 minutes. Dichloromethane (2 mL) was added, and the mixture was stirred at room temperature until completion (TLC). A 1 M solution of TMS-diazomethane in diethyl ether (0.4 mmol) was added via syringe and the reaction was stirred for 2 hours at room temperature. The reaction mixture was chromatographed on silica gel eluting with hexane:EtOAc mixtures to give compound **3**.

### Characterization data for compounds 3

**tert-Butyl (R)-(1-benzyl-3-(5-methoxy-3-phenylisoxazol-4-yl)-2-oxoindolin-3-yl)carbamate (3aa)**

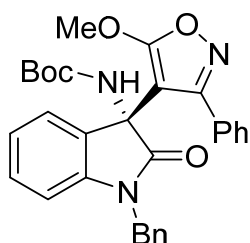

69.5 mg (70%) of **3aa** were obtained from **1a** (67.2 mg) and **2a** (32.1 mg). Enantiomeric excess (93%) was measured by HPLC (Chiralpak AD-H), hexane:*i*PrOH 80:20, 1.0 mL min<sup>-1</sup>, major enantiomer: *t<sub>r</sub>* = 17.9 min, minor enantiomer: *t<sub>r</sub>* = 23.1 min  
Pale yellow solid, m.p. = 156.3-157.4 °C; [ $\alpha$ ]<sub>D</sub><sup>25</sup> = -6.2 (*c* = 1.0, CHCl<sub>3</sub>); <sup>1</sup>H NMR (300 MHz, CDCl<sub>3</sub>)  $\delta$  7.37-7.15 (9H, m, Ar), 7.08-7.00 (3H, m, Ar), 6.91 (1H, td, *J* = 9, 1.2 Hz, Ar), 6.35 (1H, d, *J* = 9 Hz, Ar), 6.15 (1H, s, NH), 4.8 (1H, d, *J* = 15.9 Hz, CH-Ph), 4.15 (3H, s, MeO), 4.09 (1H, d, *J* = 15.9 Hz, CH-Ph), 1.26 (9H, s, *t*-BuO); <sup>13</sup>C NMR (75 MHz, CDCl<sub>3</sub>)  $\delta$  174.6 (C), 168.6 (C), 164.3 (C), 153.5 (C), 142.8 (C), 135.3 (C), 129.2 (CH), 129.1 (CH), 129.0 (CH), 128.6 (CH), 127.7 (CH), 127.6 (CH), 127.4 (CH), 124.2 (CH), 122.8 (CH), 109.1 (CH), 90.2 (C), 80.3 (C), 59.0 (C), 58.6 (CH<sub>3</sub>), 44.0 (CH<sub>2</sub>), 28.1 (CH<sub>3</sub>); IR (ATR)  $\nu$  3442, 1720 (C=O), 1615, 1405, 1168, 749, 695 cm<sup>-1</sup>; HRMS (ESI) *m/z*: 512.2198 [M+H]<sup>+</sup>, C<sub>30</sub>H<sub>30</sub>N<sub>3</sub>O<sub>5</sub><sup>+</sup> requires 512.2180.

**tert-Butyl (R)-(1-benzyl-3-(5-methoxy-3-phenylisoxazol-4-yl)-5-methyl-2-oxoindolin-3-yl)carbamate (3ba)**

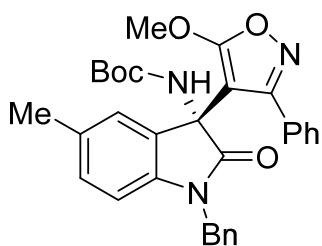

71,5 mg (67%) of **3ba** were obtained from **1b** (74.5 mg) and **2a** (32.2 mg). Enantiomeric excess (97%) was measured by HPLC (Chiralcel OD-H), hexane:*i*PrOH 80:20, 1.0 mL min<sup>-1</sup>, major enantiomer: *t<sub>r</sub>* = 10.1 min, minor enantiomer: *t<sub>r</sub>* = 8.0 min.

Yellow solid, m.p. = 65.2-67.1 °C; [ $\alpha$ ]<sub>D</sub><sup>25</sup> = +5.4 (*c* = 0.78, CHCl<sub>3</sub>); <sup>1</sup>H NMR (300 MHz, CDCl<sub>3</sub>)  $\delta$  7.41-7.12 (9H, m, Ar), 7.05 (1H, s, Ar), 6.99 (2H, dd, *J* = 8.2, 1.3 Hz, Ar), 6.82 (1H, ddd, *J* = 8.2, 1.6, 0.7 Hz, Ar), 6.23 (1H, d, *J* = 7.9 Hz, Ar), 6.17 (1H, s, N-H), 4.77 (1H, d, *J* = 15.7 Hz, CH-Ph), 4.17 (3H, s, MeO), 4.04 (1H, d, *J* = 15.7 Hz, CH-Ph), 2.20 (3H, s, Ar-CH<sub>3</sub>), 1.28 (9H, s, *t*-BuO); <sup>13</sup>C NMR (75 MHz, CDCl<sub>3</sub>)  $\delta$  174.8 (C), 169.0 (C), 164.7 (C), 153.9 (C), 140.6 (C), 135.8 (C), 132.7 (CH), 130.4 (C), 129.7 (CH), 129.4 (CH), 128.9 (C), 128.0 (CH), 127.9 (CH), 127.7 (CH), 125.3 (CH), 109.2 (CH), 90.7 (C), 80.6 (C), 59.4 (C), 58.9 (CH<sub>3</sub>), 44.3 (CH<sub>2</sub>), 28.1 (CH<sub>3</sub>), 21.3 (CH<sub>3</sub>); IR (ATR)  $\nu$  3431,

1718 (C=O), 1623, 1477, 1407, 1161, 920, 697  $\text{cm}^{-1}$ ; **HRMS** (ESI)  $m/z$ : 526.2330  $[\text{M}+\text{H}]^+$ ,  $\text{C}_{31}\text{H}_{32}\text{N}_3\text{O}_5^+$  requires 526.2336.

**tert-Butyl (R)-(1-benzyl-5-methoxy-3-(5-methoxy-3-phenylisoxazol-4-yl)-2-oxoindolin-3-yl)carbamate (3ca)**

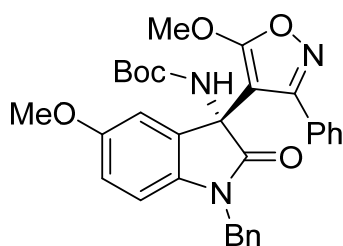

66,6 mg (62%) of **3ca** were obtained from **1c** (73.3 mg) and **2a** (32.6 mg). Enantiomeric excess (96%) was measured by HPLC (Chiralcel OD-H), hexane:*i*PrOH 80:20, 1.0 mL  $\text{min}^{-1}$ , major enantiomer:  $t_r = 12.3$  min, minor enantiomer:  $t_r = 9.3$  min.

Orange solid, m.p. = 71.3-72.4  $^{\circ}\text{C}$ ;  $[\alpha]_{\text{D}}^{25} = +10.5$  ( $c = 1.0$ ,  $\text{CHCl}_3$ );  **$^1\text{H NMR}$**  (300 MHz,  $\text{CDCl}_3$ )  $\delta$  7.40-7.12 (9H, m, Ar), 7.08-7.00 (2H, m, Ar), 6.88 (1H, d,  $J = 2.4$  Hz, Ar), 6.55 (1H, dd,  $J = 8.4, 2.7$  Hz, Ar), 6.24 (1H, d,  $J = 8.8$  Hz, Ar), 6.14 (1H, s, NH), 4.77 (1H, d,  $J = 15.9$  Hz, CH-Ph), 4.17 (3H, s, MeO), 4.09 (1H, d,  $J = 15.9$  Hz, CH-Ph), 3.68 (3H, s, MeO), 1.28 (9H, s, *t*-BuO);  **$^{13}\text{C NMR}$**  (75 MHz,  $\text{CDCl}_3$ )  $\delta$  174.4 (C), 168.7 (C), 164.4 (C), 156.1 (C), 153.5 (C), 136.2 (C), 135.4 (C), 131.2 (C), 129.1 (CH), 128.61 (C), 128.55 (CH), 127.7 (CH), 127.6 (CH), 127.4 (CH), 113.9 (CH), 111.3 (CH), 109.6 (CH), 90.1 (C), 80.4 (C), 59.4 (C), 58.6 (CH<sub>3</sub>), 55.7 (CH<sub>3</sub>), 44.1 (CH<sub>2</sub>), 28.1 (CH<sub>3</sub>); **IR** (ATR)  $\nu$  3427, 1714 (C=O), 1617, 1490, 1403, 1272, 1006, 695  $\text{cm}^{-1}$ ; **HRMS** (ESI)  $m/z$ : 542.2269  $[\text{M}+\text{H}]^+$ ,  $\text{C}_{31}\text{H}_{32}\text{N}_3\text{O}_6^+$  requires 542.2286.

**tert-Butyl (R)-(1-benzyl-5-chloro-3-(5-methoxy-3-phenylisoxazol-4-yl)-2-oxoindolin-3-yl)carbamate (3da)**

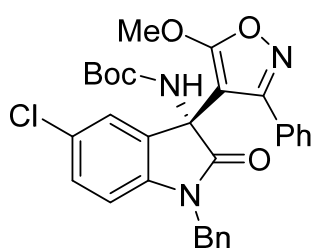

68.7 mg (63%) of **3da** were obtained from **1d** (74.4 mg) and **2a** (32.2 mg). Enantiomeric excess (95%) was measured by HPLC (Chiralcel OD-H), hexane:*i*PrOH 80:20, 1.0 mL  $\text{min}^{-1}$ , major enantiomer:  $t_r = 11.8$  min, minor enantiomer:  $t_r = 8.7$  min.

Pale yellow solid, m.p. = 76.0-79.7  $^{\circ}\text{C}$ ;  $[\alpha]_{\text{D}}^{25} = +8.3$  ( $c = 1.0$ ,  $\text{CHCl}_3$ );  **$^1\text{H NMR}$**  (300 MHz,  $\text{CDCl}_3$ )  $\delta$  7.38-7.27 (5H, m, Ar), 7.25-7.17 (4H, m, Ar), 7.04 (2H, dd,  $J = 8.2, 1.3$  Hz, Ar), 6.98 (1H, dd,  $J = 8.3, 2.1$  Hz, Ar), 6.29-6.15 (2H, m, Ar + NH), 4.80 (1H, d,  $J = 15.9$  Hz, CH-Ph), 4.19 (3H, s, MeO), 4.06 (1H, d,  $J = 15.9$  Hz, CH-Ph), 1.30 (9H, s, *t*-BuO);  **$^{13}\text{C NMR}$**  (75 MHz,  $\text{CDCl}_3$ )  $\delta$  174.3 (C), 168.7 (C), 164.2 (C), 153.4 (C), 141.3 (C), 134.9 (C), 131.7 (C), 129.3 (CH), 129.1 (CH), 129.0 (C), 128.6 (CH), 128.4 (C),

128.2 (C), 127.8 (CH), 127.6 (CH), 127.5 (CH), 124.6 (CH), 110.1 (CH), 84.5 (C), 80.7 (C), 59.0 (C), 58.7 (CH<sub>3</sub>), 55.7 (CH<sub>3</sub>), 44.1 (CH<sub>2</sub>), 28.1 (CH<sub>3</sub>); **IR** (ATR)  $\nu$  3427, 2967, 1716 (C=O), 1610, 1477, 1403, 1155, 1008, 697 cm<sup>-1</sup>; **HRMS** (ESI)  $m/z$ : 546.1769 [M+H]<sup>+</sup>, C<sub>30</sub>H<sub>29</sub>ClN<sub>3</sub>O<sub>5</sub><sup>+</sup> requires 546.1790.

**tert-Butyl (R)-(1-benzyl-5-bromo-3-(5-methoxy-3-phenylisoxazol-4-yl)-2-oxoindolin-3-yl)carbamate (3ea)**

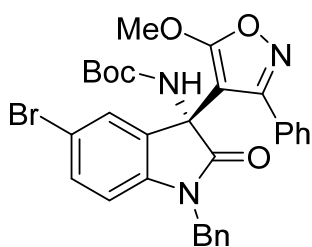

75.8 mg (64%) of **3ea** were obtained from **1e** (83.1 mg) and **2a** (32.2 mg). Enantiomeric excess (94%) was measured by HPLC (Chiralcel AD-H), hexane:*i*PrOH 80:20, 1.0 mL min<sup>-1</sup>, major enantiomer:  $t_r$  = 12.1 min, minor enantiomer:  $t_r$  = 16.0 min.

White solid, m.p. = 143.3-144.0 °C;  $[\alpha]_D^{25}$  = +15.2 ( $c$  = 0.82, CHCl<sub>3</sub>); **<sup>1</sup>H NMR** (300 MHz, CDCl<sub>3</sub>)  $\delta$  7.32-7.15 (9H, m, Ar), 7.08 (1H, dd,  $J$  = 8.3, 2.0 Hz, Ar), 7.02-6.98 (2H, m, Ar), 6.16-6.13 (2H, m, NH+Ar), 4.77 (1H, d,  $J$  = 15.9 Hz, CH-Ph), 4.15 (3H, s, MeO), 4.01 (2H, d,  $J$  = 15.9 Hz, CH-Ph), 1.26 (9H, s, *t*-BuO); **<sup>13</sup>C NMR** (75 MHz, CDCl<sub>3</sub>)  $\delta$  174.2 (C), 168.7 (C), 164.2 (C), 153.4 (C), 141.8 (C), 134.9 (C), 132.1 (C), 131.8 (CH), 129.3 (CH), 129.1 (CH), 128.6 (CH), 128.4 (C), 127.8 (CH), 127.6 (CH), 127.5 (CH), 127.3 (CH), 115.5 (C), 110.6 (CH), 89.5 (C), 80.7 (C), 58.9 (C), 58.8 (CH<sub>3</sub>), 44.1 (CH<sub>2</sub>), 28.1 (CH<sub>3</sub>); **IR** (ATR)  $\nu$  3431, 1722 (C=O), 1623, 1474, 1405, 1155, 1006, 695 cm<sup>-1</sup>; **HRMS** (ESI)  $m/z$ : 590.1279 [M+H]<sup>+</sup>, C<sub>30</sub>H<sub>29</sub>BrN<sub>3</sub>O<sub>5</sub><sup>+</sup> requires 590.1285.

**tert-Butyl (R)-(1-benzyl-5-nitro-3-(5-methoxy-3-phenylisoxazol-4-yl)-2-oxoindolin-3-yl)carbamate (3da)**

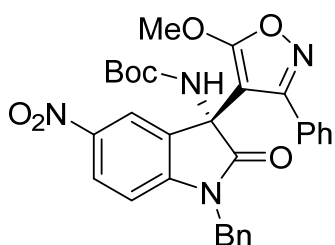

77.8 mg (70%) of **3da** were obtained from **1d** (76.5 mg) and **2a** (32.2 mg). Enantiomeric excess (96%) was measured by HPLC (Chiralcel OD-H), hexane:*i*PrOH 90:10, 1.0 mL min<sup>-1</sup>, major enantiomer:  $t_r$  = 34.4 min, minor enantiomer:  $t_r$  = 41.3 min.

Orange solid, m.p. = 78.4-81.9 °C;  $[\alpha]_D^{25}$  = +30.8 ( $c$  = 0.79, CHCl<sub>3</sub>); **<sup>1</sup>H NMR** (300 MHz, CDCl<sub>3</sub>)  $\delta$  8.0 (1H, d,  $J$  = 2.1 Hz, Ar), 7.93 (1H, dd,  $J$  = 8.7, 2.1 Hz, Ar) 7.35-7.21 (6H, m, Ar), 7.17 (2H, t,  $J$  = 7.5 Hz, Ar), 7.03-6.93 (1H, m, Ar), 6.35 (1H, d,  $J$  = 8.7 Hz, Ar), 6.30 (1H, s, NH), 4.80 (1H, d,  $J$  = 15.9 Hz, CH-Ph), 4.17 (4H, m, MeO + CH-Ph), 1.30

(9H, s, *t*-BuO);  $^{13}\text{C}$  NMR (75 MHz,  $\text{CDCl}_3$ )  $\delta$  175.2 (C), 169.0 (C), 164.0 (C), 153.6 (C), 148.6 (C), 143.9 (C), 131.2 (C), 129.7 (CH), 129.2 (CH), 128.9 (CH), 128.3 (C), 128.1 (CH), 128.0 (CH), 127.6 (CH), 126.2 (CH), 119.8 (CH), 108.9 (CH), 88.7 (C), 81.2 (C), 59.0 (CH<sub>3</sub>), 58.7 (C), 58.7 (CH<sub>3</sub>), 44.6 (CH<sub>2</sub>), 28.2 (CH<sub>3</sub>); IR (ATR)  $\nu$  1716 (C=O), 1610, 1477, 1330, 1153, 1067, 1006, 698  $\text{cm}^{-1}$ ; HRMS (ESI)  $m/z$ : 557.2017  $[\text{M}+\text{H}]^+$ ,  $\text{C}_{30}\text{H}_{29}\text{N}_4\text{O}_7^+$  requires 557.2031.

***tert*-Butyl (*R*)-(1-benzyl-6-methoxy-3-(5-methoxy-3-phenylisoxazol-4-yl)-2-oxoindolin-3-yl)carbamate (3ga)**

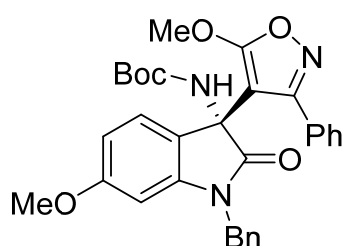

56.3 mg (52%) of **3ga** were obtained from **1h** (52.4 mg) and **2a** (32.2 mg). Enantiomeric excess (55%) was measured by HPLC (Chiralcel AS-H), hexane:*i*PrOH 90:10, 1.0 mL min<sup>-1</sup>, major enantiomer:  $t_r$  = 15.6 min, minor enantiomer:  $t_r$  = 12.4 min

Yellow solid, m.p. = 63.5-66.8 °C;  $[\alpha]_D^{25}$  = +5.8 ( $c$  = 0.87,  $\text{CHCl}_3$ );  $^1\text{H}$  NMR (300 MHz,  $\text{CDCl}_3$ )  $\delta$  7.36 – 7.10 (9H, m, Ar), 7.02 (1H, s, Ar), 7.00 (1H, d,  $J$  = 8.2, 7.6, 0.8 Hz, Ar), 6.36 (1H, dd,  $J$  = 7.1, 2.3 Hz, Ar), 6.09 (1H, s, N-H), 4.76 (1H, d,  $J$  = 15.7 Hz, CH-Ph), 4.18-4.01 (4H, m, MeO + CH-Ph), 3.64 (3H, s, OCH<sub>3</sub>), 1.26 (9H, s, *t*-BuO);  $^{13}\text{C}$  NMR (75 MHz,  $\text{CDCl}_3$ )  $\delta$  175.2 (C), 168.6 (C), 164.5 (C), 153.6 (C), 144.0 (C), 135.3 (C), 129.1 (CH), 129.0 (CH), 128.6 (CH), 127.7 (CH), 127.6 (CH), 127.5 (CH), 125.2 (CH), 122.2 (C), 106.4 (CH), 97.2 (CH), 90.6 (C), 80.2 (C), 58.7 (C), 58.6 (CH<sub>3</sub>), 44.17 (CH<sub>2</sub>), 28.1 (CH<sub>3</sub>); IR (ATR)  $\nu$  3438, 1716 (C=O), 1619, 1477, 1403, 1159, 1006, 697  $\text{cm}^{-1}$ ; HRMS (ESI)  $m/z$ : 542.2285  $[\text{M}+\text{H}]^+$ ,  $\text{C}_{31}\text{H}_{32}\text{N}_3\text{O}_6^+$  requires 542.2286.

***tert*-Butyl (*R*)-(1-benzyl-6-chloro-3-(5-methoxy-3-phenylisoxazol-4-yl)-2-oxoindolin-3-yl)carbamate (3ia)**

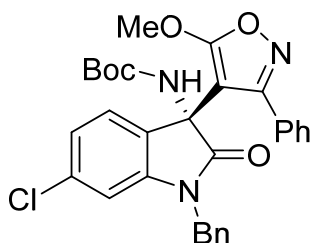

68.0 mg (63%) of **3ia** were obtained from **1h** (74.5 mg) and **2a** (32.2 mg). Enantiomeric excess (92%) was measured by HPLC (Chiralcel OD-H), hexane:*i*PrOH 80:20, 1.0 mL min<sup>-1</sup>, major enantiomer:  $t_r$  = 9.9 min, minor enantiomer:  $t_r$  = 7.7 min.

Pale yellow solid, m.p. = 75.4-77.3 °C;  $[\alpha]_D^{25}$  = +10.8 ( $c$  = 0.82,  $\text{CHCl}_3$ );  $^1\text{H}$  NMR (300 MHz,  $\text{CDCl}_3$ )  $\delta$  7.48-7.04 (9H, m, Ar), 6.98 (1H, m, Ar), 6.84 (1H, dd,  $J$  = 8.0, 1.8 Hz), 4.78 (1H, d,  $J$  = 15.6 Hz, CH-Ph), 4.13 (3H, s, MeO), 4.04

(1H, d,  $J = 15.6$  Hz, CH-Ph), 1.24 (9H, s, *t*-BuO);  $^{13}\text{C}$  NMR (75 MHz,  $\text{CDCl}_3$ )  $\delta$  174.7 (C), 168.6 (C), 164.2 (C), 153.5 (C), 143.9 (C), 134.7 (C), 129.2 (CH), 129.0 (CH), 128.7 (CH), 128.5 (CH), 128.3 (C), 127.8 (CH), 127.7 (CH), 127.5 (CH), 125.0 (CH), 122.7 (CH) 109.6 (CH), 89.7 (C), 80.6 (C), 58.7 ( $\text{CH}_3$ ), 55.7 ( $\text{CH}_3$ ), 53.4 (C), 44.1 ( $\text{CH}_2$ ), 28.1 ( $\text{CH}_3$ ); IR (ATR)  $\nu$  3431, 1738 (C=O), 1710, 1608, 1476, 1403, 1284, 1162, 1006, 698  $\text{cm}^{-1}$ ; HRMS (ESI)  $m/z$ : 546.1791  $[\text{M}+\text{H}]^+$ ,  $\text{C}_{30}\text{H}_{29}\text{ClN}_3\text{O}_5^+$  requires 546.1790.

***tert*-Butyl (R)-(1-benzyl-7-chloro-3-(5-methoxy-3-phenylisoxazol-4-yl)-2-oxoindolin-3-yl)carbamate (3ia)**

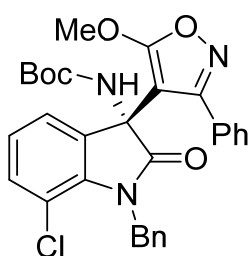

68.2 mg (67%) of **3ia** were obtained from **1i** (74.2 mg) and **2a** (32.2 mg). Enantiomeric excess (95%) was measured by HPLC (Chiralcel OD-H), hexane:*i*PrOH 80:20, 1.0  $\text{mL min}^{-1}$ , major enantiomer:  $t_r = 15.9$  min, minor enantiomer:  $t_r = 13.7$  min.

Yellow solid, m.p. = 68.4-71.0  $^\circ\text{C}$ ;  $[\alpha]_{\text{D}}^{25} = -42.1$  ( $c = 0.76$ ,  $\text{CHCl}_3$ );

$^1\text{H}$  NMR (300 MHz,  $\text{CDCl}_3$ )  $\delta$  7.56-7.08 (9H, m, Ar), 6.87 (1H, dd,  $J = 8.1, 7.3$  Hz Ar), 6.35 (1H, s, N-H), 5.01 (1H, d,  $J = 15.8$  Hz, CH-Ph), 4.04 (1H, d,  $J = 15.8$  Hz, CH-Ph) 4.20 (3H, s, MeO), 1.30 (9H, s, *t*-BuO);  $^{13}\text{C}$  NMR (75 MHz,  $\text{CDCl}_3$ )  $\delta$  175.6(C), 168.6 (C), 164.3 (C), 153.4 (C), 139.1 (C), 137.3 (C), 133.5 (CH), 131.8 (C), 129.7 (CH), 129.1 (CH), 128.3 (C), 127.9 (CH), 127.0 (CH), 123.8 (CH), 122.5 (CH), 115.5 (CH), 90.0 (C), 80.8 (C), 58.9 ( $\text{CH}_3$ ), 58.8 (C), 45.1 ( $\text{CH}_2$ ), 28.2 ( $\text{CH}_3$ ); IR (ATR)  $\nu$  3425, 1718 (C=O), 1617, 1451, 1403, 1157, 1123, 1008, 697  $\text{cm}^{-1}$ ; HRMS (ESI)  $m/z$ : 546.1781  $[\text{M}+\text{H}]^+$ ,  $\text{C}_{30}\text{H}_{29}\text{ClN}_3\text{O}_5^+$  requires 546.1790.

***tert*-Butyl (R)-(1-benzyl-3-(5-methoxy-3-phenylisoxazol-4-yl)-5,7-dimethyl-2-oxoindolin-3-yl)carbamate (3ja)**

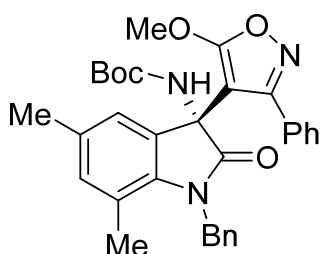

68.7 mg (64%) of **3ja** were obtained from **1j** (72.9 mg) and **2a** (32.2 mg). Enantiomeric excess (97%) was measured by HPLC (Chiralcel OD-H), hexane:*i*PrOH 80:20, 1.0  $\text{mL min}^{-1}$ , major enantiomer:  $t_r = 9.8$  min, minor enantiomer:  $t_r = 7.4$  min.

Yellow oil.  $[\alpha]_{\text{D}}^{25} = -7.2$  ( $c = 1.0$ ,  $\text{CHCl}_3$ );  $^1\text{H}$  NMR (300 MHz,  $\text{CDCl}_3$ )  $\delta$  7.37 (1H, tt,  $J = 7.5, 2.1$  Hz, Ar), 7.31-7.13 (7H, m, Ar), 6.91 (3H, m, Ar), 6.31 (1H, s, Ar), 6.46 (1H, s, NH), 4.93 (1H, d,  $J = 17.1$  Hz, CH-Ph), 4.25 (3H, s, MeO), 4.08 (1H, d,  $J = 17.1$  Hz, CH-Ph), 2.20 (3H, s,  $\text{CH}_3$ -Ph), 1.89 (3H, s,  $\text{CH}_3$ -Ph), 1.28 (9H, s, *t*-BuO);  $^{13}\text{C}$  NMR

(75 MHz, CDCl<sub>3</sub>)  $\delta$  175.5 (C), 168.3 (C), 164.3 (C), 153.5 (C), 138.3 (C), 137.4 (C), 133.6 (CH), 132.4 (C), 131.3 (CH), 129.2 (C), 129.1 (CH), 128.5 (CH), 127.4 (CH), 126.8 (CH), 126.1 (CH), 122.5 (CH), 119.3 (C), 90.9 (C), 80.3 (C), 58.7 (CH<sub>3</sub>), 45.2 (CH<sub>2</sub>), 28.1 (CH<sub>3</sub>), 20.7 (CH<sub>3</sub>), 18.3 (CH<sub>3</sub>); **IR** (ATR)  $\nu$  3442, 2920, 1716 (C=O), 1623, 1477, 1403, 1161, 1008, 695 cm<sup>-1</sup>; **HRMS** (ESI)  $m/z$ : 540.2490 [M+H]<sup>+</sup>, C<sub>32</sub>H<sub>34</sub>N<sub>3</sub>O<sub>5</sub><sup>+</sup> requires 540.2493.

**tert-Butyl (R)-(3-(5-methoxy-3-phenylisoxazol-4-yl)-1methyl-2-oxoindolin-3-yl)carbamate (3ka)**

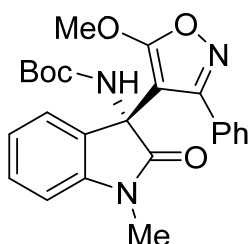

55.2 mg (64%) of **3ka** were obtained from **1k** (52.4 mg) and **2a** (32.2 mg). Enantiomeric excess (94%) was measured by HPLC (Chiralcel AS-H), hexane:*i*PrOH 90:10, 1.0 mL min<sup>-1</sup>, major enantiomer:  $t_r$  = 11.2 min, minor enantiomer:  $t_r$  = 13.9 min

Yellow oil;  $[\alpha]_D^{25}$  = +11.7 ( $c$  = 1.0, CHCl<sub>3</sub>); **<sup>1</sup>H NMR** (300 MHz, CDCl<sub>3</sub>)  $\delta$  7.44 – 7.29 (2H, m, Ar), 7.30 – 7.16 (2H, m, Ar), 7.07 (1H, td,  $J$  = 8.2, 7.6, 0.8 Hz, Ar), 6.93 (1H, d,  $J$  = 7.1 Hz, Ar), 6.49 (1H, s, Ar), 6.46 (1H, s, N-H), 4.34 (3H, s, MeO), 2.8 (3H, s, MeN), 1.31 (9H, s, *t*-BuO); **<sup>13</sup>C NMR** (75 MHz, CDCl<sub>3</sub>)  $\delta$  174.2 (C), 168.6 (C), 164.5 (C), 153.5 (C), 143.5 (C), 143.5 (C), 129.4 (CH), 129.2 (CH), 129.1 (CH), 128.5 (C), 127.7 (CH), 123.8 (CH), 123.0 (CH), 108.2 (CH), 90.3 (C), 80.5 (C), 59.0 (CH<sub>3</sub>), 28.1 (CH<sub>3</sub>), 26.1 (CH<sub>3</sub>); **IR** (ATR)  $\nu$  3425, 1712 (C=O), 1612, 1472, 1403, 1284, 1153, 764, 697 cm<sup>-1</sup>; **HRMS** (ESI)  $m/z$ : 438.1869 [M+H]<sup>+</sup>, C<sub>24</sub>H<sub>26</sub>N<sub>3</sub>O<sub>5</sub><sup>+</sup> requires 438.1867.

**tert-Butyl (R)-(3-(5-methoxy-3-phenylisoxazol-4-yl)-1-(methoxymethyl)-2-oxoindolin-3-yl)carbamate (3la)**

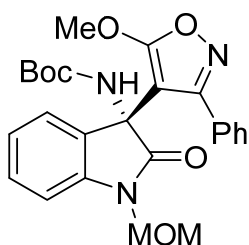

53.4 mg (57%) of **3la** were obtained from **1l** (58.6 mg) and **2a** (32.2 mg). Enantiomeric excess (92%) was measured by HPLC (Chiralpak AS-H), hexane:*i*PrOH 90:10, 1.0 mL min<sup>-1</sup>, major enantiomer:  $t_r$  = 8.9 min, minor enantiomer:  $t_r$  = 10.3 min.

Brown solid, m.p. = 66.1-66.5 °C;  $[\alpha]_D^{25}$  = +51.8 ( $c$  = 0.80, CHCl<sub>3</sub>); **<sup>1</sup>H NMR** (300 MHz, CDCl<sub>3</sub>)  $\delta$  7.34-7.13 (5H, m, Ar), 7.03-6.92 (3H, m, Ar), 6.67 (1H, d,  $J$  = 7.1 Hz, Ar), 6.31 (1H, s, NH), 4.78 (1H, d,  $J$  = 11.0 Hz, CH-OMe), 4.33 (1H, d,  $J$  = 11.0 Hz, CH-OMe), 4.20 (3H, s, MeO), 3.31 (3H, s, Me), 1.26 (9H, s, *t*-BuO); **<sup>13</sup>C NMR** (75 MHz, CDCl<sub>3</sub>)  $\delta$  175.0 (C), 168.4 (C), 164.2 (C), 153.3 (C), 141.9 (C), 129.9



(C), 129.3 (CH), 129.2 (CH), 129.1 (CH), 128.3 (C), 127.7 (CH), 123.7 (CH), 123.3 (CH), 109.6 (CH), 90.2 (C), 80.4 (C), 71.5 (C), 59.2 (C), 58.8 (CH<sub>3</sub>), 56.6 (CH<sub>3</sub>), 28.1 (CH<sub>3</sub>); **IR** (ATR)  $\nu$  3429, 2978, 1716 (C=O), 1612, 1477, 1401, 1153, 1008, 915, 751, 697 cm<sup>-1</sup>; **HRMS** (ESI)  $m/z$ : 466.1957 [M+H]<sup>+</sup>, C<sub>25</sub>H<sub>28</sub>N<sub>3</sub>O<sub>6</sub><sup>+</sup> requires 466.1973.

**tert-Butyl (R)-(1-benzyl-3-(5-methoxy-3-(4-methoxyphenyl)isoxazol-4-yl)-2-oxoindolin-3-yl)carbamate (3ab)**

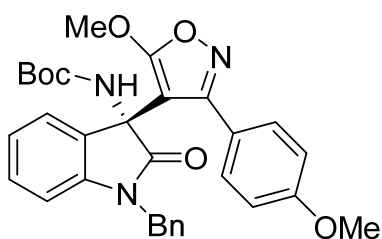

59.0 mg (55%) of **3ab** were obtained from **1a** (67.3 mg) and **2b** (38.2 mg). Enantiomeric excess (94%) was measured by HPLC (Phenomenex Lux<sup>®</sup> 5 $\mu$ m Amylose-1), hexane;<sup>i</sup>PrOH 80:20, 1.0 mL min<sup>-1</sup>, major enantiomer:  $t_r$  = 19.9 min, minor enantiomer:  $t_r$  = 17.9 min.

Pale yellow solid, m.p. = 148.0-148.3 °C;  $[\alpha]_D^{25}$  = +20.2 ( $c$  = 0.78, CHCl<sub>3</sub>); **<sup>1</sup>H NMR** (300 MHz, CDCl<sub>3</sub>)  $\delta$  7.29-7.12 (9H, m, Ar), 7.01-6.95 (3H, m, Ar), 6.84 (1H, td,  $J$  = 7.5, 1.0 Hz, Ar), 6.64 (2H, m, Ar), 6.34 (1H, d,  $J$  = 7.8 Hz, Ar), 6.01 (1H, s, NH), 4.72 (1H, d,  $J$  = 15.9 Hz, CH-Ph), 4.21 (1H, d,  $J$  = 15.8 Hz, CH-Ph), 4.00 (3H, s, MeO), 3.72 (3H, s, MeO), 1.17 (9H, s, *t*-BuO); **<sup>13</sup>C NMR** (75 MHz, CDCl<sub>3</sub>)  $\delta$  174.8 (C), 168.6 (C), 164.2 (C), 160.4 (C), 153.5 (C), 142.9 (C), 135.4 (C), 130.6 (CH), 130.3 (C), 129.0 (CH), 128.6 (CH), 127.6 (CH), 127.5 (CH), 125.2 (CH), 122.8 (CH), 120.8 (C), 113.3 (CH), 109.1 (CH), 90.1 (C), 80.3 (C), 59.1 (C), 58.5 (CH<sub>3</sub>), 55.3 (CH<sub>3</sub>), 44.2 (CH<sub>2</sub>), 28.1 (CH<sub>3</sub>); **IR** (ATR)  $\nu$  3436, 1716 (C=O), 1613, 1479, 1401, 1244, 1155, 993, 751, 697, 577 cm<sup>-1</sup>; **HRMS** (ESI)  $m/z$ : 542.2271 [M+H]<sup>+</sup>, C<sub>31</sub>H<sub>32</sub>N<sub>3</sub>O<sub>6</sub><sup>+</sup> requires 542.2286.

**tert-Butyl (R)-(1-benzyl-3-(3-(4-bromophenyl)-5-methoxyisoxazol-4-yl)-2-oxoindolin-3-yl)carbamate (3ac)**

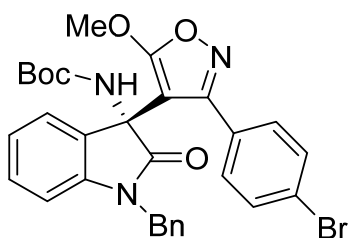

87.1 mg (76%) of **1a** were obtained from **1a** (67.3 mg) and **2c** (48.0 mg). Enantiomeric excess (85%) was measured by HPLC (Chiralpak AD-H), hexane;<sup>i</sup>PrOH 80:20, 1.0 mL min<sup>-1</sup>, major enantiomer:  $t_r$  = 17.3 min, minor enantiomer:  $t_r$  = 14.3 min.

Yellow oil,  $[\alpha]_D^{25}$  = +27.8 ( $c$  = 0.94, CHCl<sub>3</sub>); **<sup>1</sup>H NMR** (300 MHz, CDCl<sub>3</sub>)  $\delta$  7.38-7.25 (6H, m, Ar), 7.09 (1H, td,  $J_1$  = 7.7,  $J_2$  = 1.3 Hz), 6.94-6.89 (3H, m, Ar), 6.43 (1H, d,  $J$  = 7.8 Hz, Ar), 6.04 (1H, s, NH), 4.78 (1H, d,  $J$  = 15.6 Hz, CH-Ph), 4.29 (1H, d,  $J$  = 15.6 Hz, CH-Ph), 4.13 (3H, s, MeO), 1.26 (9H, s, *t*-BuO); **<sup>13</sup>C NMR** (75 MHz, CDCl<sub>3</sub>)  $\delta$  174.6 (C), 168.9 (C), 163.4 (C), 153.5 (C), 142.7 (C), 135.2 (C), 130.9 (CH), 130.8 (CH), 130.0

(C), 129.2 (CH), 128.6 (CH), 127.7 (CH), 127.6 (CH), 127.5 (C), 124.5 (CH), 123.7 (C), 122.9 (CH), 109.1 (CH), 90.2 (C), 80.4 (C), 59.0 (C), 58.7 (CH<sub>3</sub>), 44.1 (CH<sub>2</sub>), 28.1 (CH<sub>3</sub>); **IR** (ATR)  $\nu$  3432, 1716 (C=O), 1615, 1477, 1403, 1066, 993, 749 cm<sup>-1</sup>; **HRMS** (ESI)  $m/z$ : 590.1279 [M+H]<sup>+</sup>, C<sub>30</sub>H<sub>29</sub>BrN<sub>3</sub>O<sub>5</sub><sup>+</sup> requires 590.1285.

**tert-Butyl (R)-(1-benzyl-3-(5-methoxy-3-(4-methoxyphenyl)isoxazol-4-yl)-5-nitro-2-oxoindolin-3-yl)carbamate (3fb)**

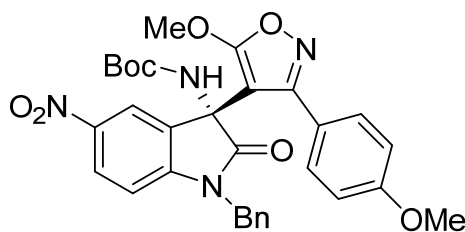

32.7 mg (56%) of **3db** were obtained from **1d** (38.1 mg) and **2b** (19.1 mg). Enantiomeric excess (95%) was measured by HPLC (Phenomenex Lux<sup>®</sup> 5 $\mu$ m Amylose-1), hexane;<sup>i</sup>PrOH 90:10, 1.0 mL min<sup>-1</sup>, major enantiomer:  $t_r$  = 62.2 min, minor enantiomer:  $t_r$  = 58.0 min.

Yellow oil;  $[\alpha]_D^{25}$  = +54.7 ( $c$  = 0.78, CHCl<sub>3</sub>); **<sup>1</sup>H NMR** (300 MHz, CDCl<sub>3</sub>)  $\delta$  8.03-7.98 (2H, m, Ar), 7.37-7.27 (5H, m, Ar), 7.06-7.01 (2H, m, Ar), 6.76-6.71 (2H, m, Ar), 6.24 (1H, s, NH), 4.92 (1H, d,  $J$  = 15.9 Hz, CH-Ph), 4.35 (1H, d,  $J$  = 15.8 Hz, CH-Ph), 4.15 (3H, s, MeO), 3.80 (3H, s, MeO), 1.30 (9H, s, *t*-BuO); **<sup>13</sup>C NMR** (75 MHz, CDCl<sub>3</sub>)  $\delta$  175.2 (C), 168.7 (C), 163.7 (C), 160.6 (C), 153.4 (C), 148.5 (C), 143.5 (C), 134.3 (C), 131.1 (C), 130.5 (CH), 128.8 (CH), 127.9 (CH), 127.5 (CH), 126.1 (CH), 120.3 (C), 119.7 (CH), 113.5 (CH), 108.7 (CH), 88.5 (C), 81.0 (C), 58.7 (CH), 58.6 (C), 58.4 (CH<sub>3</sub>), 44.6 (CH<sub>2</sub>), 28.1 (CH<sub>3</sub>); **IR** (ATR)  $\nu$  3432, 1716 (C=O), 1615, 1477, 1403, 1066, 993, 749 cm<sup>-1</sup>; **IR** (ATR)  $\nu$  3432, 1716 (C=O), 1615, 1477, 1403, 1066, 993, 749 cm<sup>-1</sup>; **HRMS** (ESI)  $m/z$ : 587.2112 [M+H]<sup>+</sup>, C<sub>31</sub>H<sub>31</sub>N<sub>4</sub>O<sub>8</sub><sup>+</sup> requires 587.2136.

**tert-Butyl (R)-(1-benzyl-3-(5-methoxy-3-methylisoxazol-4-yl)-2-oxoindolin-3-yl)carbamate (3ad)**

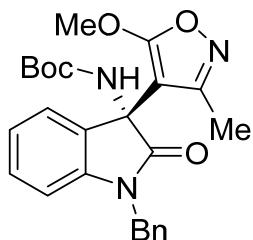

53.2 mg (59%) of **3ad** were obtained from **1a** (67.3 mg) and **2d** (19.8 mg). Enantiomeric excess (41%) was measured by HPLC (Chiralpak AD-H), hexane;<sup>i</sup>PrOH 80:20, 1.0 mL min<sup>-1</sup>, major enantiomer:  $t_r$  = 23.8 min, minor enantiomer:  $t_r$  = 14.0 min.

Yellow oil;  $[\alpha]_D^{25}$  = +10.7, ( $c$  = 0.81, CHCl<sub>3</sub>); **<sup>1</sup>H NMR** (300 MHz, CDCl<sub>3</sub>)  $\delta$  7.41-7.37 (9H, m, Ar), 7.34-7.27 (4H, m, Ar), 7.21 (1H, td,  $J$  = 7.5, 1.0 Hz, Ar), 7.02 (1H, td,  $J$  = 7.5, 1.0 Hz, Ar), 6.77 (1H, d,  $J$  = 7.7 Hz, Ar), 6.21 (1H, s, NH), 5.01 (1H, d,  $J$  = 15.4 Hz, CH-Ph), 4.83 (1H, d,  $J$  = 15.4 Hz, CH-Ph), 4.11 (3H, s, MeO),

1.53 (3H, s, MeO), 1.31 (9H, s, *t*-BuO);  $^{13}\text{C}$  NMR (75 MHz,  $\text{CDCl}_3$ )  $\delta$  175.0 (C), 168.8 (C), 160.7 (C), 153.8 (C), 142.9 (C), 135.6 (C), 129.8 (C), 129.4 (CH), 128.7 (CH), 127.7 (CH), 124.2 (CH), 123.0 (CH), 109.1 (CH), 89.3 (C), 80.6 (C), 58.9 (C), 58.5 (CH<sub>3</sub>), 44.4 (CH<sub>2</sub>), 28.1 (CH<sub>3</sub>), 11.5 (CH<sub>3</sub>); IR (ATR)  $\nu$  3421, 2976, 1712 (C=O), 1608, 1455, 1284, 1161, 944, 751, 700  $\text{cm}^{-1}$ ; HRMS (ESI)  $m/z$ : 450.2020  $[\text{M}+\text{H}]^+$ ,  $\text{C}_{25}\text{H}_{28}\text{N}_3\text{O}_5^+$  requires 450.2023.

***tert*-Butyl (R)-(1-benzyl-3-(3-cyclopropyl-5-methoxyisoxazol-4-yl)-2-oxoindolin-3-yl)carbamate (3ae)**

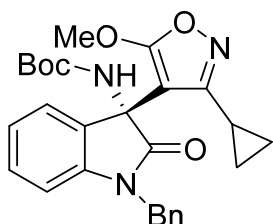

27.0 mg (57%) of **3ae** were obtained from **1a** (33.6 mg) and **2e** (12.5 mg). Enantiomeric excess (65%) was measured by HPLC (Chiralpak AD-H), hexane;*i*PrOH 80:20, 1.0 mL  $\text{min}^{-1}$ , major enantiomer:  $t_r$  = 17.5 min, minor enantiomer:  $t_r$  = 14.6 min.

Yellow solid, m.p. = 141.5-141.9  $^{\circ}\text{C}$ ;  $[\alpha]_{\text{D}}^{25}$  = +8.2 ( $c$  = 0.89,  $\text{CHCl}_3$ );  $^1\text{H}$  NMR (300 MHz,  $\text{CDCl}_3$ )  $\delta$  7.43-7.27 (5H, m, Ar), 7.19 (1H, td,  $J$  = 7.7, 1.3 Hz, Ar), 7.02 (1H, td,  $J$  = 7.5, 1.0 Hz, Ar), 6.74 (1H, d,  $J$  = 7.8 Hz, Ar), 6.26 (1H, bs, NH), 5.00-4.90 (1H, m, Ar), 4.02 (3H, s, MeO), 1.30-1.16 (10H, m, *t*-BuO + CH), 0.79-0.68 (2H, m, CH<sub>2</sub>), 0.56-0.41 (2H, m, CH<sub>2</sub>),  $^{13}\text{C}$  NMR (75 MHz,  $\text{CDCl}_3$ )  $\delta$  175.1 (C), 168.6 (C), 165.1 (C), 153.7 (C), 143.1 (C), 135.6 (C), 129.9 (C), 129.2 (CH), 128.7 (CH), 127.8 (CH), 127.6 (CH), 124.2 (CH), 122.9 (CH), 108.9 (CH), 90.2 (C), 80.5 (C), 59.1 (C), 58.4 (CH<sub>3</sub>), 44.5 (CH<sub>2</sub>), 28.1 (CH<sub>3</sub>), 7.1 (CH<sub>2</sub>), 7.01 (CH), 6.11 (CH<sub>2</sub>); IR (ATR)  $\nu$  3423, 1735, 1710 (C=O), 1627, 1468, 1422, 1164, 1047, 754, 702  $\text{cm}^{-1}$ ; HRMS (ESI)  $m/z$ : 476.2189  $[\text{M}+\text{H}]^+$ ,  $\text{C}_{27}\text{H}_{30}\text{N}_3\text{O}_5^+$  requires 476.2180.

***tert*-butyl (1-benzyl-3-(4-benzyl-5-oxo-3-phenyl-4,5-dihydroisoxazol-4-yl)-2-oxoindolin-3-yl)carbamate (3af)**

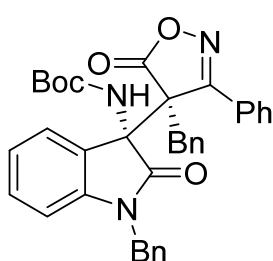

49.7 mg (85% overall yield) of product **3af** were obtained in a 41:59 diastereoisomeric ratio.

**Syn diastereoisomer**: 20.6 mg (35%) were obtained from **1a** (33.6 mg) and **2h** (25.1 mg). Enantiomeric excess (>99%) was measured by HPLC (Chiralpak AD-H), hexane;*i*PrOH 80:20, 1.0 mL  $\text{min}^{-1}$ , major enantiomer:  $t_r$  = 24.1 min, minor enantiomer:  $t_r$  = 25.7 min

Orange solid, m.p. = 133.4-134.3°C;  $[\alpha]_D^{25} = +87.5$  ( $c = 0.82$ ,  $\text{CHCl}_3$ );  $^1\text{H NMR}$  (300 MHz,  $\text{CDCl}_3$ )  $\delta$  7.61-7.55 (1H, m, Ar), 7.49-7.38 (4H, m, Ar), 7.37-7.25 (6H, m, Ar), 7.22-6.94 (8H, m, Ar), 6.14 (1H, d,  $J = 7.8$  Hz, Ar), 4.83 (1H, d,  $J = 16.2$  Hz, CH-Ph), 4.58 (1H, d,  $J = 14.9$  Hz, CH-Ph), 3.84 (1H, d,  $J = 14.9$  Hz, CH-Ph), 2.85 (1H, d,  $J = 16.0$  Hz, CH-Ph), 1.37 (9H, s, *t*-BuO);  $^{13}\text{C NMR}$  (75 MHz,  $\text{CDCl}_3$ )  $\delta$  178.9 (C), 171.2 (C), 165.1 (C), 153.5 (C), 141.9 (C), 134.6 (C), 131.7 (CH), 130.1 (CH), 129.7 (CH), 128.8 (CH), 128.6 (CH), 128.4 (CH), 128.1 (C), 128.0 (CH), 127.9 (CH), 127.3 (CH), 127.2 (CH), 123.3 (CH), 121.6 (CH), 109.8 (CH), 80.9 (C), 61.6 (C), 60.8 (C), 43.2 ( $\text{CH}_2$ ), 33.9 ( $\text{CH}_2$ ), 28.2 ( $\text{CH}_3$ ); **IR** (ATR)  $\nu$  3391, 2976, 1768, 1718 (C=O), 1610, 1487, 1366, 1157, 889, 752, 695  $\text{cm}^{-1}$ ; **HRMS** (ESI)  $m/z$ : 528.2488  $[\text{M}+\text{H}]^+$ ,  $\text{C}_{36}\text{H}_{34}\text{N}_3\text{O}_5^+$  requires 528.2493.

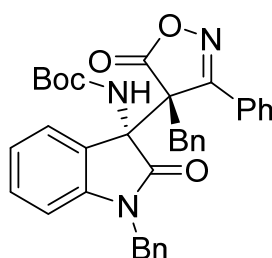

**Anti diastereoisomer:** 29.1 mg (50%) were obtained from **1a** (33.6 mg) and **2h** (25.1 mg). Enantiomeric excess (72%) was measured by HPLC (Chiralpak AD-H), hexane;*i*PrOH 80:20, 1.0 mL min<sup>-1</sup>, major enantiomer:  $t_r = 14.3$  min, minor enantiomer:  $t_r = 7.8$  min

Yellow solid, m.p. = 142.8-144.0 °C;  $[\alpha]_D^{25} = +9.1$  ( $c = 0.97$ ,  $\text{CHCl}_3$ );  $^1\text{H NMR}$  (300 MHz,  $\text{CDCl}_3$ )  $\delta$  7.53 (1H, dd,  $J = 7.1, 1.5$  Hz, Ar), 7.35-6.99 (18H, m, Ar), 5.99 (1H, d,  $J = 7.4, 1.3$  Ar), 5.04 (1H, d,  $J = 15.6$  Hz, CH-Ph), 4.01-3.83 (3H, m, CH-Ph), 1.27 (9H, s, *t*-BuO);  $^{13}\text{C NMR}$  (75 MHz,  $\text{CDCl}_3$ )  $\delta$  178.1 (C), 174.1 (C), 163.9 (C), 154.4 (C), 143.6 (C), 134.6 (C), 131.7 (C), 130.7 (CH), 130.1 (CH), 129.8 (CH), 128.8 (CH), 128.6 (CH), 128.3 (CH), 128.1 (C), 127.9 (CH), 127.6 (CH), 127.5 (C), 127.4 (CH), 125.7 (C), 124.6 (CH), 122.6 (CH), 109.5 (CH), 81.0 (C), 64.9 (C), 58.6 (C), 44.1 ( $\text{CH}_2$ ), 36.4 ( $\text{CH}_2$ ), 27.9 ( $\text{CH}_3$ ); **IR** (ATR)  $\nu$  3384, 2976, 1768, 1716 (C=O), 1612, 1480, 1366, 1155, 900, 728, 695, 505  $\text{cm}^{-1}$ ; **HRMS** (ESI)  $m/z$ : 528.2488  $[\text{M}+\text{H}]^+$ ,  $\text{C}_{36}\text{H}_{34}\text{N}_3\text{O}_5^+$  requires 528.2493.

***tert*-butyl (1-benzyl-3-(4-methyl-5-oxo-3-phenyl-4,5-dihydroisoxazol-4-yl)-2-oxoindolin-3-yl)carbamate (**3ag**)**

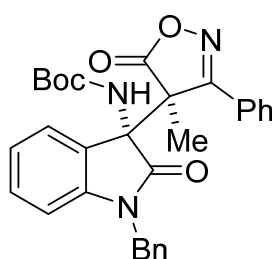

47.4 mg (93% overall yield) of product **3ag** were obtained in a 32:68 diastereoisomeric ratio.

**Syn diastereoisomer:** 15.4 mg (30%) were obtained from **1a** (33.6 mg) and **2g** (17.5 mg). Enantiomeric excess (27%) was

measured by HPLC (Chiralpak AD-H), hexane;*i*PrOH 80:20, 1.0 mL min<sup>-1</sup>, major enantiomer: *t<sub>r</sub>* = 11.8 min, minor enantiomer: *t<sub>r</sub>* = 28.1 min

Yellow solid, m.p. = 161.1-162.6°C; [ $\alpha$ ]<sub>D</sub><sup>25</sup> = +17.4 (*c* = 0.96, CHCl<sub>3</sub>); <sup>1</sup>H NMR (300 MHz, CDCl<sub>3</sub>)  $\delta$  7.58-7.53 (1H, m, Ar), 7.47-7.41 (1H, m, 2H), 7.22-7.11 (9H, m, Ar), 7.00 (1H, td, *J* = 7.6 Hz, *J* = 1.0 Hz, Ar), 6.60 (1H, bs, NH), 6.23 (d, *J* = 7.8 Hz, Ar), 4.58 (1H, d, *J* = 16.2 Hz), CH-Ph), 2.86 (1H, d *J* = 16.2 Hz, CH-Ph), 2.23 (3H, s, CH<sub>3</sub>), 1.33 (9H, s, *t*-BuO); <sup>13</sup>C NMR (75 MHz, CDCl<sub>3</sub>)  $\delta$  179.7 (C), 170.9 (C), 167.2 (C), 153.5 (C), 141.8 (C), 134.6 (C), 131.7 (CH), 130.1 (CH), 129.0 (C), 128.7 (CH), 128.4 (CH), 127.5 (CH), 127.4 (C), 127.3 (CH), 127.2 (C), 126.0 (C), 123.2 (CH), 121.6 (CH), 109.7 (CH), 80.8 (C), 60.9 (C), 54.2 (C), 42.7 (CH<sub>2</sub>), 28.2 (C), 28.1 (CH<sub>3</sub>), 15.2 (CH<sub>3</sub>); IR (ATR)  $\nu$  3395, 2924, 1776, 1718 (C=O), 1612, 1489, 1366, 1157, 898, 751, 695 cm<sup>-1</sup>; HRMS (ESI) *m/z*: 512.2172 [M+H]<sup>+</sup>, C<sub>30</sub>H<sub>30</sub>N<sub>3</sub>O<sub>5</sub><sup>+</sup> requires 512.2180.

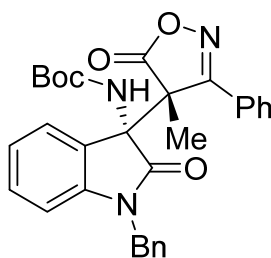

**Anti diastereoisomer:** 32.0 mg (63%) were obtained from **1a** (33.6 mg) and **2g** (17.5 mg). Enantiomeric excess (86%) was measured by HPLC (Chiralpak AD-H), hexane;*i*PrOH 80:20, 1.0 mL min<sup>-1</sup>, major enantiomer: *t<sub>r</sub>* = 17.9 min, minor enantiomer: *t<sub>r</sub>* = 10.9 min

Yellow oil, [ $\alpha$ ]<sub>D</sub><sup>25</sup> = -56.9 (*c* = 1.0, CHCl<sub>3</sub>); <sup>1</sup>H NMR (300 MHz, CDCl<sub>3</sub>)  $\delta$  7.38 (1H, dd, *J* = 6.8, 1.7 Hz, Ar), 7.30-7.18 (7H, m, Ar), 7.05-6.89 (7H, m, Ar), 6.00 (1H, dd, *J* = 7.3, Ar), 5.04 (1H, d, *J* = 15.5 Hz, CH-Ph), 4.07 (1H, d, *J* = 15.5 Hz, CH-Ph), 2.07 (3H, s, CH<sub>3</sub>), 1.23 (9H, s, *t*-BuO); <sup>13</sup>C NMR (75 MHz, CDCl<sub>3</sub>)  $\delta$  179.3 (C), 174.1 (C), 166.3 (C), 154.2 (C), 143.2 (C), 134.7 (C), 130.6 (CH), 130.0 (CH), 128.6 (CH), 127.9 (CH), 127.8 (C), 127.7 (CH), 127.6 (CH), 126.9 (CH), 125.4 (C), 124.2 (CH), 122.4 (CH), 109.7 (CH), 80.9 (C), 64.4 (C), 51.9 (C), 44.2 (CH<sub>2</sub>), 27.9 (CH<sub>3</sub>), 17.9 (CH<sub>3</sub>); IR (ATR)  $\nu$  3362, 2980, 1774, 1716 (C=O), 1612, 1487, 1366, 1250, 1157, 894, 728, 691 cm<sup>-1</sup>; HRMS (ESI) *m/z*: 512.2172 [M+H]<sup>+</sup>, C<sub>30</sub>H<sub>30</sub>N<sub>3</sub>O<sub>5</sub><sup>+</sup> requires 512.2180.

***tert*-butyl (1-benzyl-3-(4-benzyl-3-methyl-5-oxo-4,5-dihydroisoxazol-4-yl)-2-oxoindolin-3-yl)carbamate (**3ah**)**

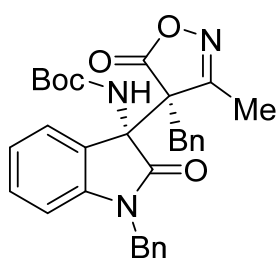

97.7 mg (93% overall yield) of product **3ah** were obtained in a 48:52 diastereoisomeric ratio.

**Syn diastereoisomer:** 47.1 mg (45%) were obtained from **1a** (67.2 mg) and **2f** (37.8 mg). Enantiomeric excess (46%) was

measured by HPLC (Chiralpak AD-H), hexane;*i*PrOH 80:20, 1.0 mL min<sup>-1</sup>, major enantiomer: *t<sub>r</sub>* = 13.9 min, minor enantiomer: *t<sub>r</sub>* = 15.4 min

Yellow solid, m.p. = 155.4-156.5 °C; [ $\alpha$ ]<sub>D</sub><sup>25</sup> = +48.5 (*c* = 0.79, CHCl<sub>3</sub>); <sup>1</sup>H NMR (300 MHz, CDCl<sub>3</sub>)  $\delta$  7.58-7.54 (2H, m, Ar), 7.38-7.21 (8H, m, Ar), 7.19-7.16 (1H, m, Ar), 7.11-7.07 (2H, m, Ar), 7.01 (1H, td, *J* = 7.6, 1.0 Hz, Ar), 6.86 (1H, s, NH), 6.83-6.80 (1H, m, Ar), 5.16 (1H, d, *J* = 15.3 Hz, CH-Ph), 4.81 (1H, d, *J* = 15.3 Hz, CH-Ph), 4.03 (1H, d, *J* = 14.4 Hz, CH-Ph), 3.65 (1H, d, *J* = 14.4 Hz, CH-Ph), 1.62 (3H, s, CH<sub>3</sub>), 1.35 (9H, s, *t*-BuO); <sup>13</sup>C NMR (75 MHz, CDCl<sub>3</sub>)  $\delta$  178.9 (C), 171.9 (C), 164.5 (C), 153.7 (C), 142.3 (C), 134.8 (C), 132.9 (C), 129.5 (CH), 128.8 (CH), 128.4 (CH), 127.9 (CH), 126.2 (C), 123.7 (CH), 122.5 (CH), 109.4 (CH), 81.0 (C), 60.9 (C), 60.7 (C), 44.9 (CH<sub>2</sub>), 33.2 (CH<sub>2</sub>), 28.2 (CH<sub>3</sub>), 12.7 (CH<sub>3</sub>); IR (ATR)  $\nu$  3382, 1772, 1716 (C=O), 1608, 1481, 1153, 756, 700 cm<sup>-1</sup>; HRMS (ESI) *m/z*: 526.2334 [M+H]<sup>+</sup>, C<sub>31</sub>H<sub>32</sub>N<sub>3</sub>O<sub>5</sub><sup>+</sup> requires 526.2336.

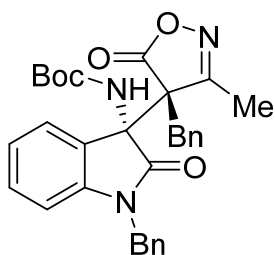

**Anti diastereoisomer:** 50.6 mg (48%) were obtained from **1a** (67.2 mg) and **2f** (37.8 mg). Enantiomeric excess (64%) was measured by HPLC (Chiralpak AD-H), hexane;*i*PrOH 80:20, 1.0 mL min<sup>-1</sup>, major enantiomer: *t<sub>r</sub>* = 36.7 min, minor enantiomer: *t<sub>r</sub>* = 12.0 min

Yellow solid, m.p. = 93.3-96.6 °C; [ $\alpha$ ]<sub>D</sub><sup>25</sup> = +10.6 (*c* = 0.76, CHCl<sub>3</sub>); <sup>1</sup>H NMR (300 MHz, CDCl<sub>3</sub>)  $\delta$  7.49 (1H, dd, *J* = 7.9, 1.0 Hz, Ar), 7.42-7.21 (9H, m, Ar), 7.15 (1H, td, *J* = 7.6, 1.0 Hz, Ar), 7.05-7.00 (2H, m, Ar), 6.98 (1H, s, NH), 6.87 (1H, dd, *J* = 7.9, 1.0 Hz, Ar), 5.09 (1H, d, *J* = 15.2 Hz, CH-Ph), 4.66 (1H, d, *J* = 15.2 Hz, CH-Ph), 3.72 (1H, d, *J* = 13.6 Hz, CH-Ph), 3.32 (1H, d, *J* = 13.6 Hz, CH-Ph), 1.31 (9H, s, *t*-BuO), 1.20 (3H, s, CH<sub>3</sub>); <sup>13</sup>C NMR (75 MHz, CDCl<sub>3</sub>)  $\delta$  177.7 (C), 173.8 (C), 163.9 (C), 154.3 (C), 143.8 (C), 135.0 (C), 131.7 (C), 130.5 (CH), 129.6 (CH), 128.9 (CH), 128.8 (CH), 128.2 (CH), 128.0 (CH), 125.5 (C), 125.1 (CH), 123.0 (CH), 109.6 (CH), 81.2 (C), 64.0 (C), 58.8 (C), 44.6 (CH<sub>2</sub>), 34.8 (CH<sub>2</sub>), 28.0 (CH<sub>3</sub>), 13.2 (CH<sub>3</sub>); IR (ATR)  $\nu$  3365, 1777, 1716 (C=O), 1610, 1485, 1366, 1157, 883, 697 cm<sup>-1</sup>; HRMS (ESI) *m/z*: 526.2334 [M+H]<sup>+</sup>, C<sub>31</sub>H<sub>32</sub>N<sub>3</sub>O<sub>5</sub><sup>+</sup> requires 526.2336.

### Synthesis of compound 3aa at one mmol scale

An oven dried round bottom flask was charged with isatin ketimine **1a** (337 mg, 1.0 mmol), isoxazol-5-one **2a** (162 mg, 1.0 mmol) and squaramide **IV** (60.0 mg, 0.1 mmol). The flask was purged with N<sub>2</sub> for 10 minutes. Dichloromethane (10 mL) was added, and the mixture was stirred at room temperature until completion (TLC). 1 M solution of TMS-diazomethane in diethyl ether (2.0 mL, 2 mmol) was added via a syringe and the reaction was stirred 2 hours at room temperature. The reaction mixture was chromatographed on silica gel eluting with hexane:EtOAc (8:2) to give 333 mg (65%) of compound **3aa** with 94% ee.

### Synthesis of *tert*-butyl ((*S*)-1-benzyl-3-((*R*)-4-fluoro-5-oxo-3-phenyl-4,5-dihydroisoxazol-4-yl)-2-oxoindolin-3-yl)carbamate (**4**)

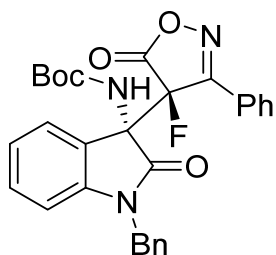

An oven dried test tube was charged with isatin ketimine **1a** (33.6 mg, 0.1 mmol), isoxazol-5-one **2** (16.1 mg, 0.1 mmol) and squaramide **IV** (6.0 mg, 0.01 mmol). The test tube was purged with N<sub>2</sub> and dichloromethane (1 mL) was added. The mixture was stirred at room temperature for 20 hours. NFSI (41.0 mg, 0.13 mmol) and K<sub>2</sub>CO<sub>3</sub> (18.0 mg, 0.13 mmol) were added and the reaction was stirred vigorously 5 more hours. Upon completion, the reaction mixture was chromatographed on silica gel eluting with hexane:EtOAc mixtures to give compound **4** (33.1 mg, 64%) as a single diastereomer (dr>20:1) with identical spectroscopical features to those described in the literature.<sup>[6]</sup> Enantiomeric excess (93%) was measured by HPLC (Phenomenex Lux® *i*-Amylose-1), 90:10 Hexane/*i*PrOH, 0.5 mL min<sup>-1</sup>, major enantiomer: *t<sub>r</sub>* = 27.8 min, minor enantiomer: *t<sub>r</sub>* = 18.5 min; lit.<sup>[6]</sup> (Chiralpak IA, same stationary phase as Lux® *i*-Amylose-1, 90:10 Hexane/*i*PrOH, 0.5 mL/min, major enantiomer: *t<sub>r</sub>* = 21.2 min, minor enantiomer *t<sub>r</sub>* = 15.2 min.

Pale yellow solid;  $[\alpha]_D^{25} = -70.7$  (*c* = 0.89, CHCl<sub>3</sub>); <sup>1</sup>H NMR (300 MHz, CDCl<sub>3</sub>) δ 7.45-7.42 (1H, m, Ar), 7.37-7.28 (5H, m, Ar), 7.18 (1H, t, *J* = 7.5 Hz, Ar), 7.00-6.91 (4H, m, Ar), 6.83 (1H, d, *J* = 7.5 Hz, Ar), 6.75 (1H, bs, NH), 6.12 (1H, d, *J* = 7.1 Hz, Ar), 4.85 (1H, d, *J* = 15.3 Hz, CH-Ph), 4.41 (1H, d, *J* = 15.3 Hz, CH-Ph), 1.28 (9H, s, *t*-BuO); <sup>19</sup>F NMR (282 MHz, CDCl<sub>3</sub>) δ -176.1 ppm; <sup>13</sup>C NMR (75 MHz, CDCl<sub>3</sub>) δ 170.8 (d, *J* = 8.2 Hz, C), 169.6 (d, *J* = 22.6 Hz, C), 160.2 (d, *J* = 13.9 Hz, C), 153.4 (C), 143.2 (C), 134.7 (C), 131.0 (CH), 130.6 (CH), 128.8 (CH), 128.2 (CH), 127.9 (CH), 127.8 (CH), 127.0

(CH), 125.6 (CH), 125.5 (CH), 123.8 (C), 123.0 (CH), 108.9 (CH), 89.2 (C), 81.3 (CH), 65.7 (d,  $J = 22.6$  Hz, C), 44.6 (CH<sub>2</sub>), 28.0 (CH<sub>3</sub>); **HRMS** (ESI)  $m/z$ : 516.1937 [M+H]<sup>+</sup>, C<sub>29</sub>H<sub>27</sub>FN<sub>3</sub>O<sub>5</sub><sup>+</sup> requires 516.1929.

### Synthesis of *tert*-butyl (*S*)-(1-benzyl-2-oxo-3-(2-oxo-2-phenylethyl)indolin-3-yl)carbamate (**5**)

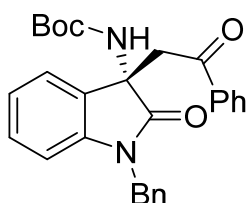

Compounds **1a** (33.6 mg) and **2a** (16.1 mg) were reacted in the presence of catalyst **IV** (6.0 mg, 0.01 mmol) as described in the general procedure omitting the methylation step. The crude was concentrated under reduced pressure and suspended in MeOH:H<sub>2</sub>O (1:1). Then, iron powder (56.1 mg, 1.0 mmol) and NH<sub>4</sub>Cl (53.5 mg, 1.0 mmol) were added, and the reaction was stirred at 60 °C overnight. The reaction mixture was filtered through a short celite pad eluting with DCM. The filtrate was concentrated under reduced pressure and purified by flash column chromatography eluting with 6:4 hexane:EtOAc to afford 41.2 mg (87%) of **5** were obtained from **3aa** (49.7 mg). Enantiomeric excess (91%) was measured by HPLC (Phenomenex Lux® *i*-Amylose-1 (90:10 Hexane/*i*PrOH, 0.5 mL min<sup>-1</sup>), major enantiomer:  $t_r = 41.1$  min, minor enantiomer:  $t_r = 10.8$  min.

Yellow oil;  $[\alpha]_D^{25} = -65.7$  ( $c = 0.95$ , CHCl<sub>3</sub>), Lit.<sup>[7]</sup>  $[\alpha]_D^{25} = -50.7$  ( $c = 0.1$ , CHCl<sub>3</sub>, 90% ee, for the *S* enantiomer), Lit.<sup>[8]</sup>  $[\alpha]_D^{25} = +52.34$  ( $c = 0.34$ , CHCl<sub>3</sub>, 95% ee, for the *R* enantiomer); **<sup>1</sup>H NMR** (300 MHz, CDCl<sub>3</sub>)  $\delta$  7.80 (1H, m, Ar), 7.54 (1H, m, Ar), 7.45-7.27 (7H, m, Ar), 7.14 (H, td,  $J = 7.7, 1.3$  Hz, Ar), 6.92 (1H, td,  $J = 7.6, 1.0$  Hz, Ar), 6.72 (1H, d,  $J = 7.8$  Hz, Ar), 6.48 (1H, bs, Ar), 5.10 (1H, d,  $J = 15.7$  Hz, CH-CO), 4.89 (1H, d,  $J = 15.7$  Hz, CH-CO), 3.70 (1H, d,  $J = 15.3$  Hz, CH-Ph), 3.36 (1H, d,  $J = 16.6$  Hz, CH-Ph), 1.33 (9H, s, *t*-BuO); **<sup>13</sup>C NMR** (75 MHz, CDCl<sub>3</sub>)  $\delta$  197.4 (C), 176.1 (C), 154.0 (C), 142.5 (C), 136.6 (C), 135.9 (C), 133.7 (CH), 129.9 (CH), 128.9 (CH), 128.7 (CH), 128.6 (CH), 128.2 (CH), 127.5 (CH), 127.4 (CH), 124.2 (CH), 122.7 (CH), 109.3 (CH), 80.2 (C), 60.0 (C), 44.2 (CH<sub>2</sub>), 43.7 (CH<sub>2</sub>), 28.1 (CH<sub>3</sub>); **HRMS** (ESI)  $m/z$ : 457.2141 [M+H]<sup>+</sup>, C<sub>28</sub>H<sub>29</sub>N<sub>2</sub>O<sub>4</sub><sup>+</sup> requires 457.2122.



# <sup>1</sup>H NMR and <sup>13</sup>C NMR spectra for compounds 3-5

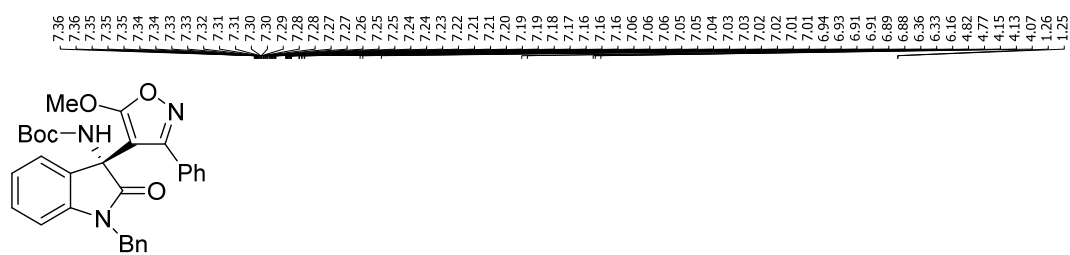

<sup>1</sup>H NMR, CDCl<sub>3</sub>, 300 MHz

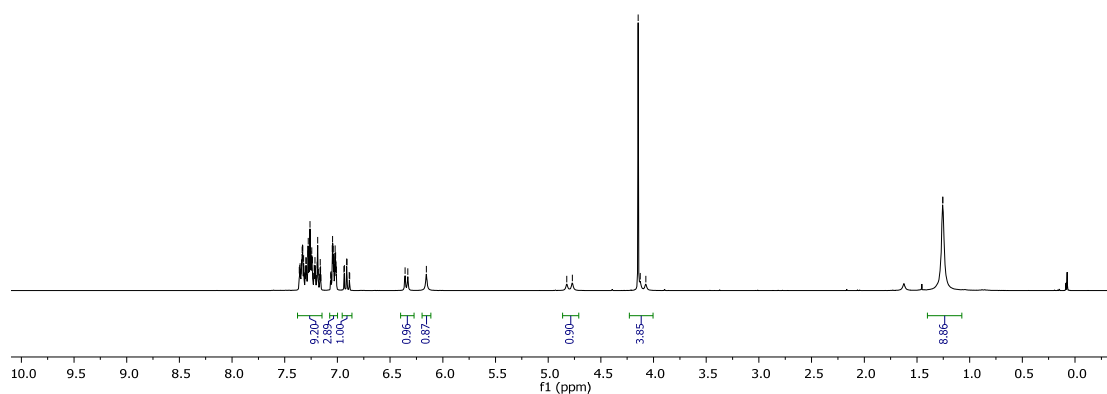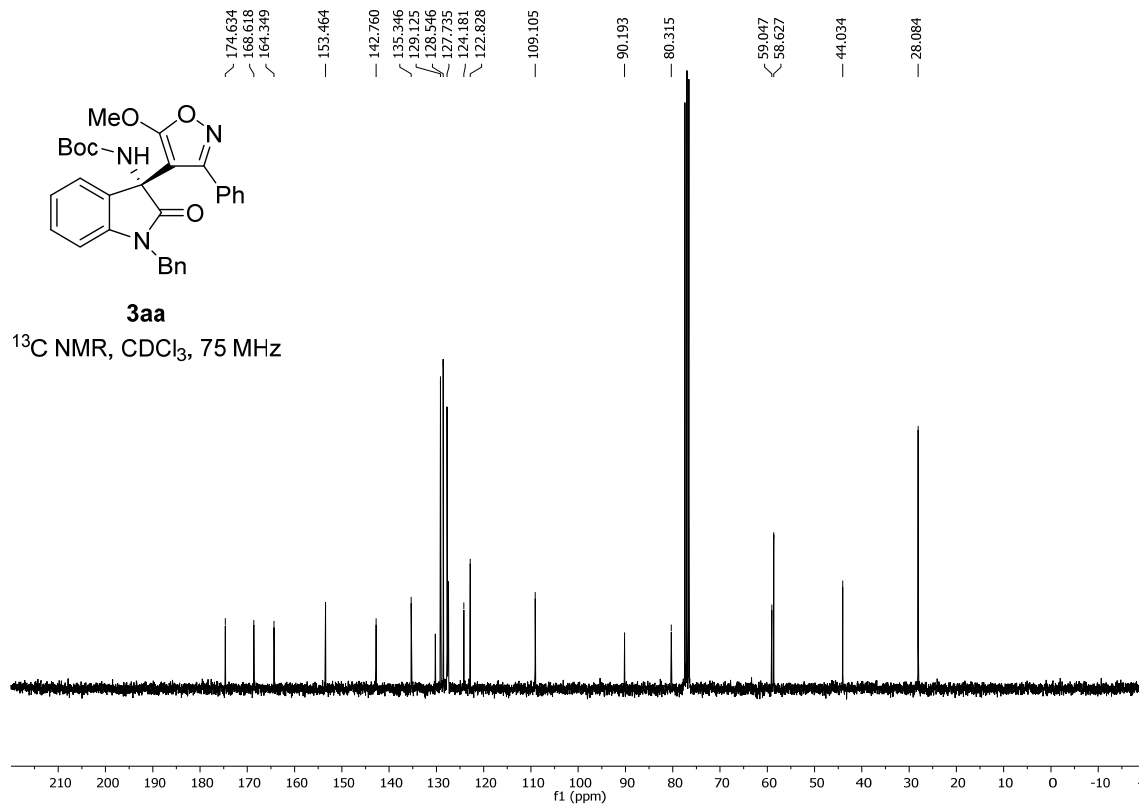

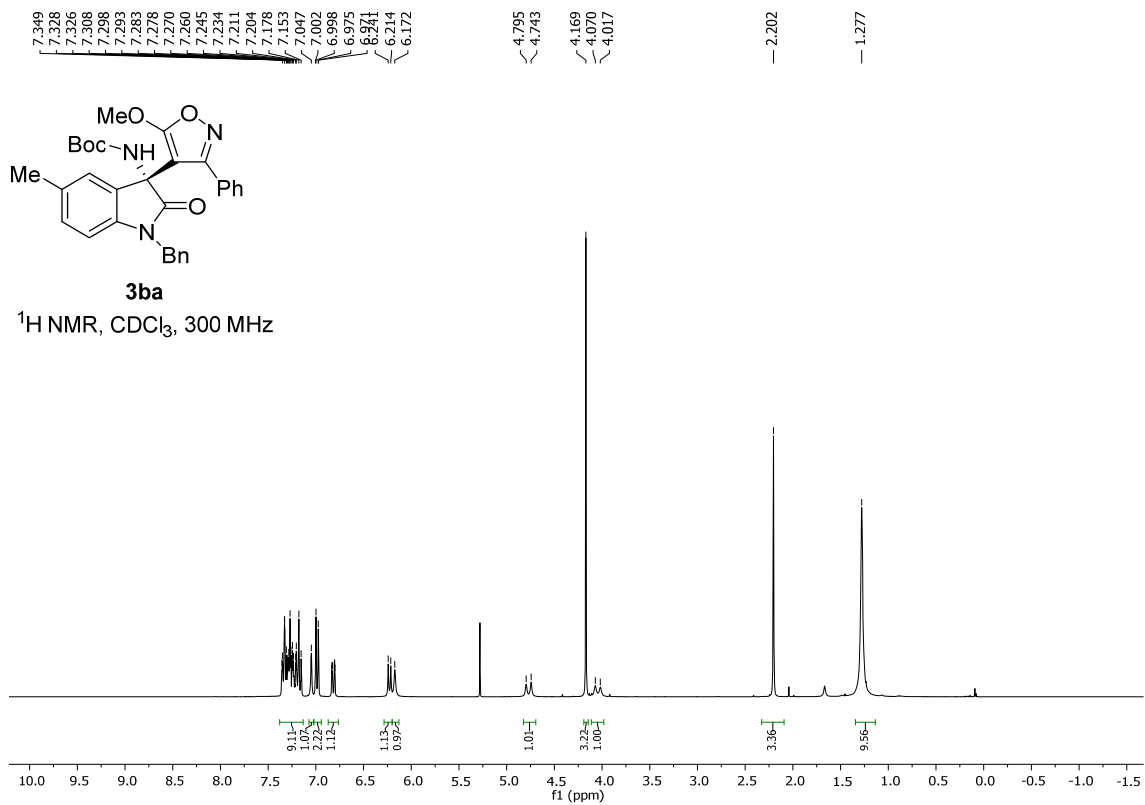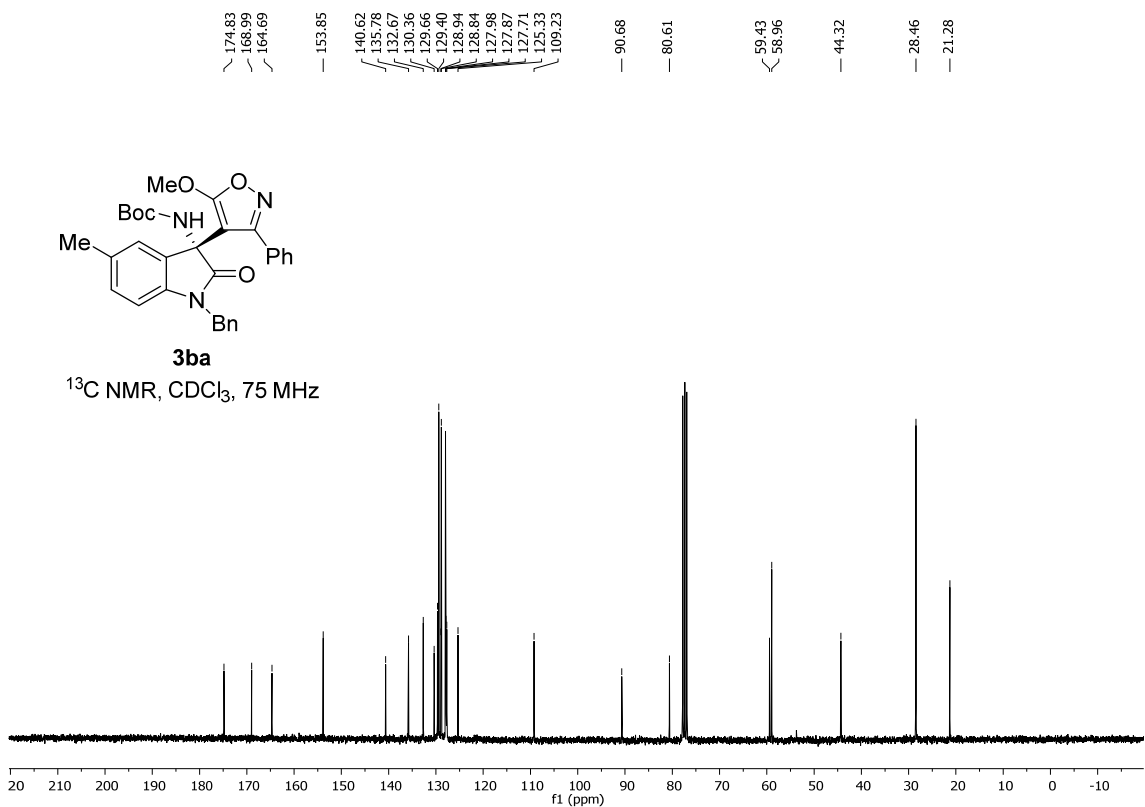

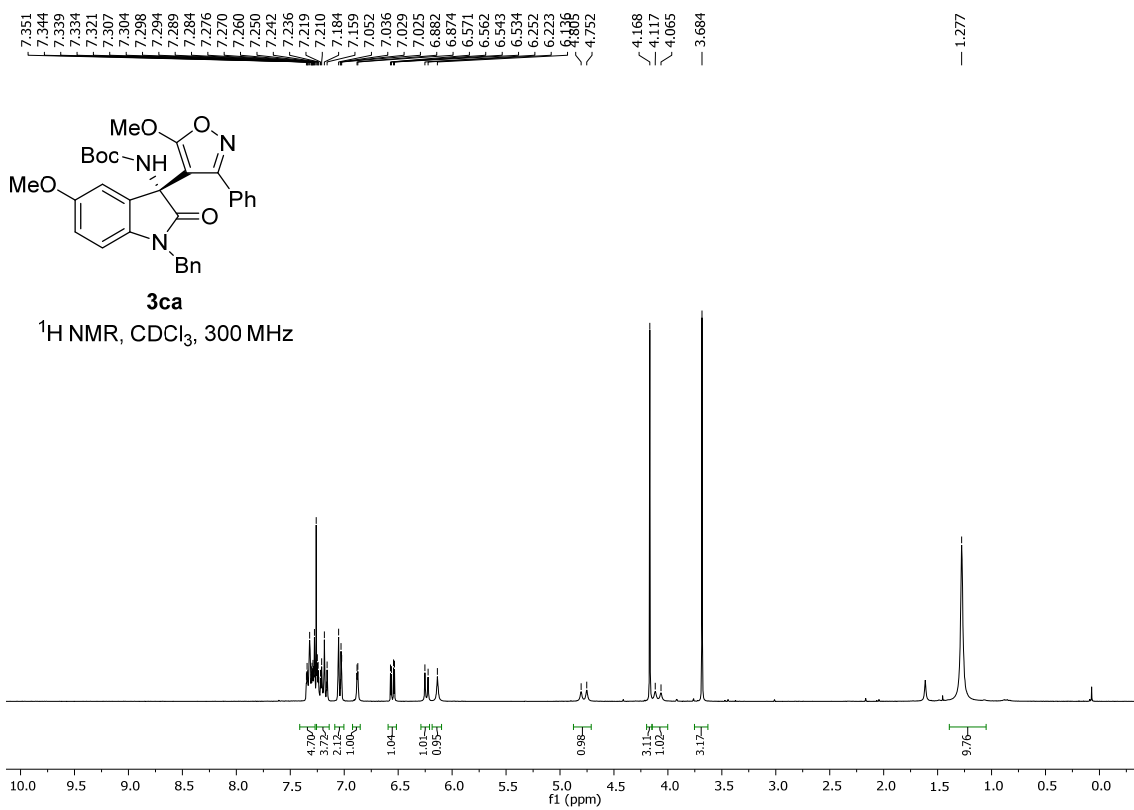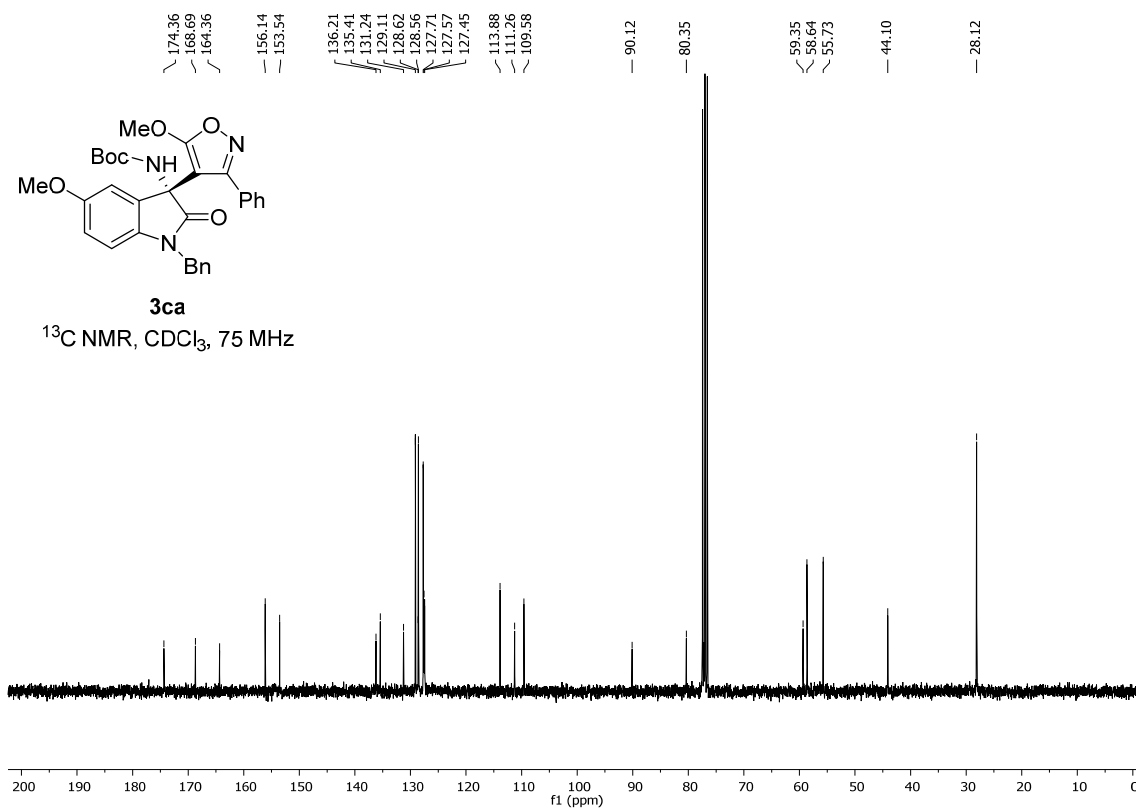

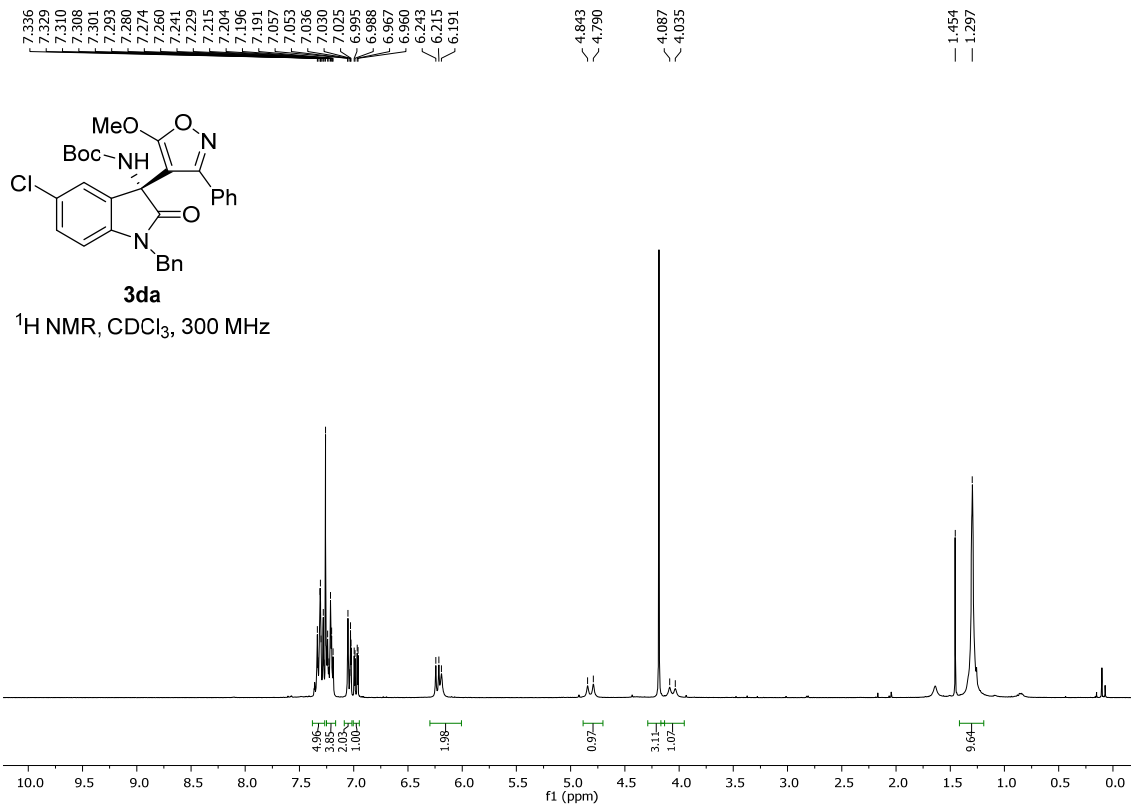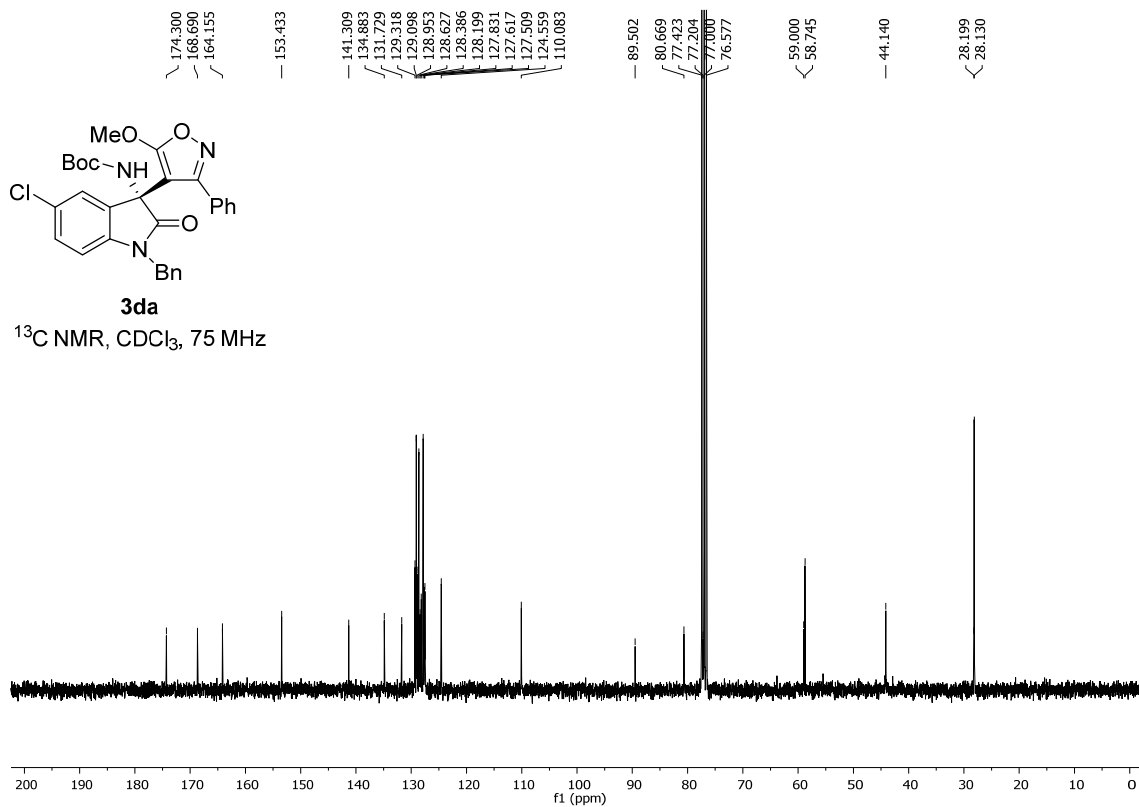

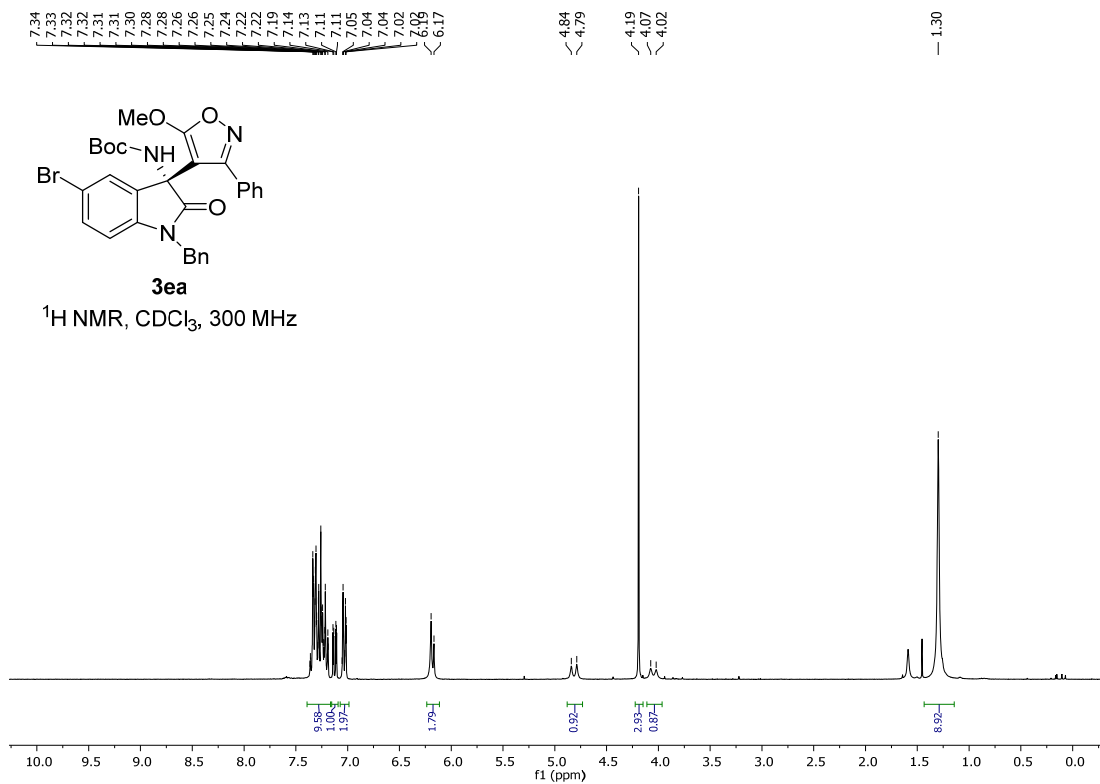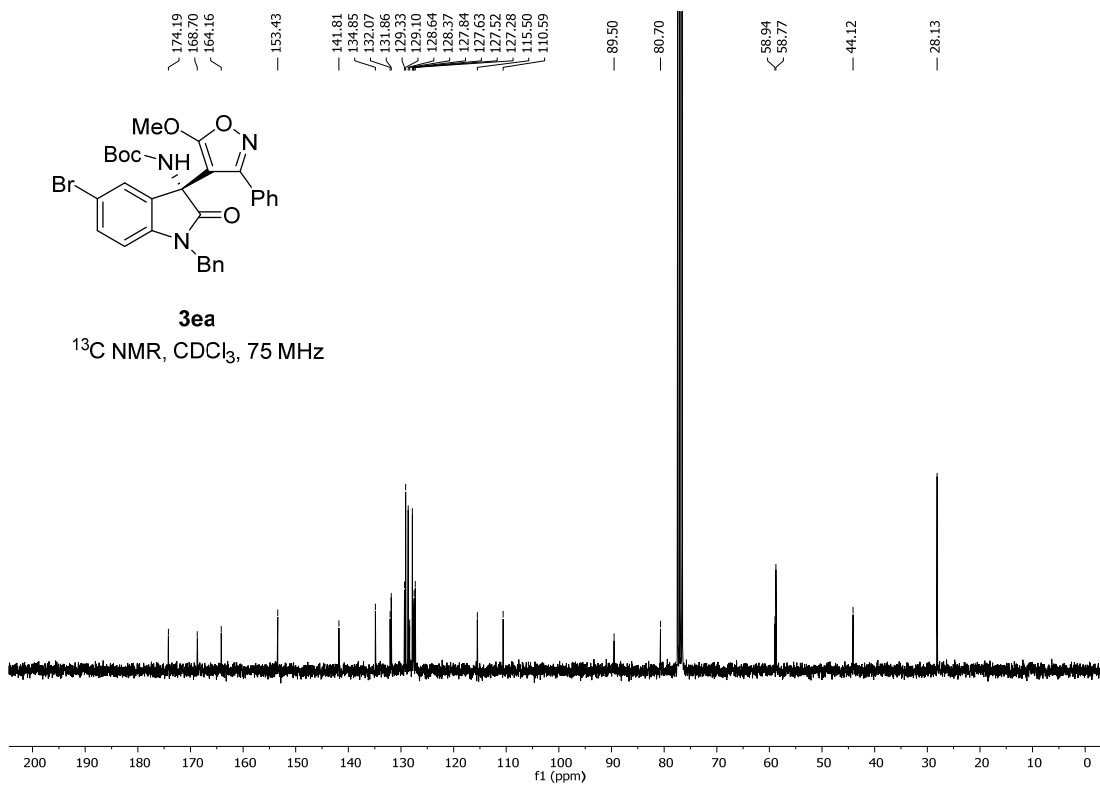

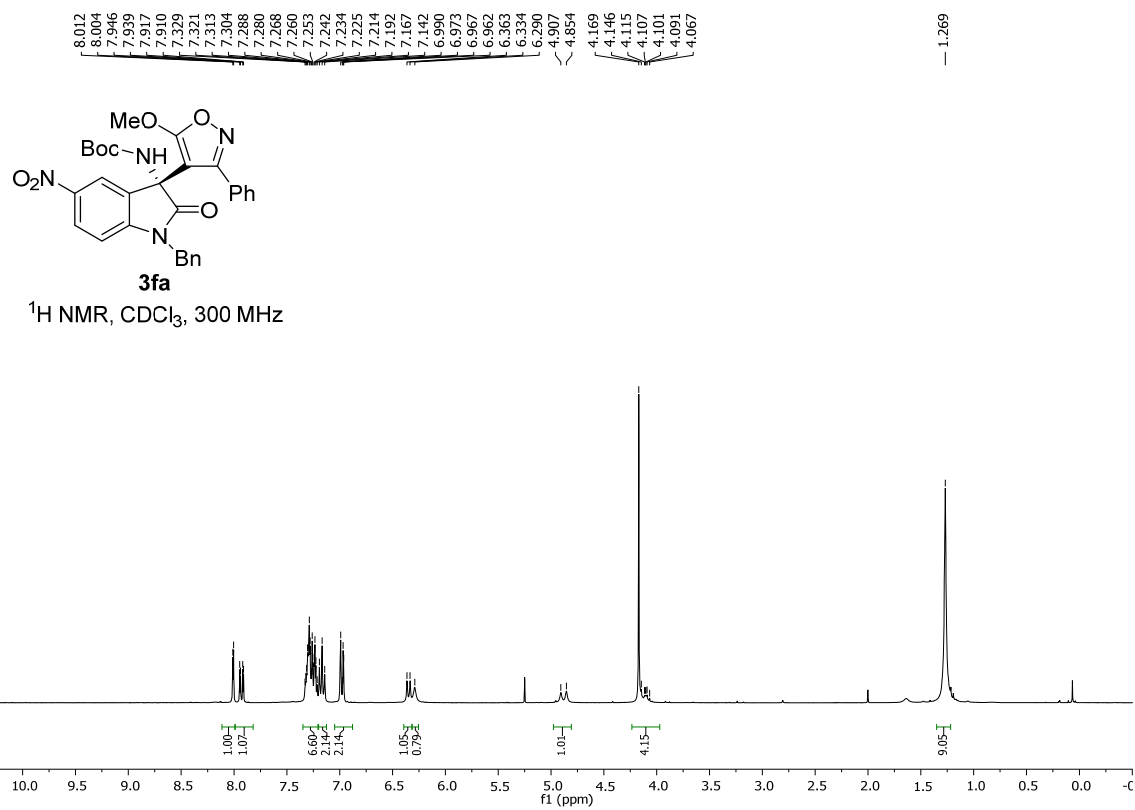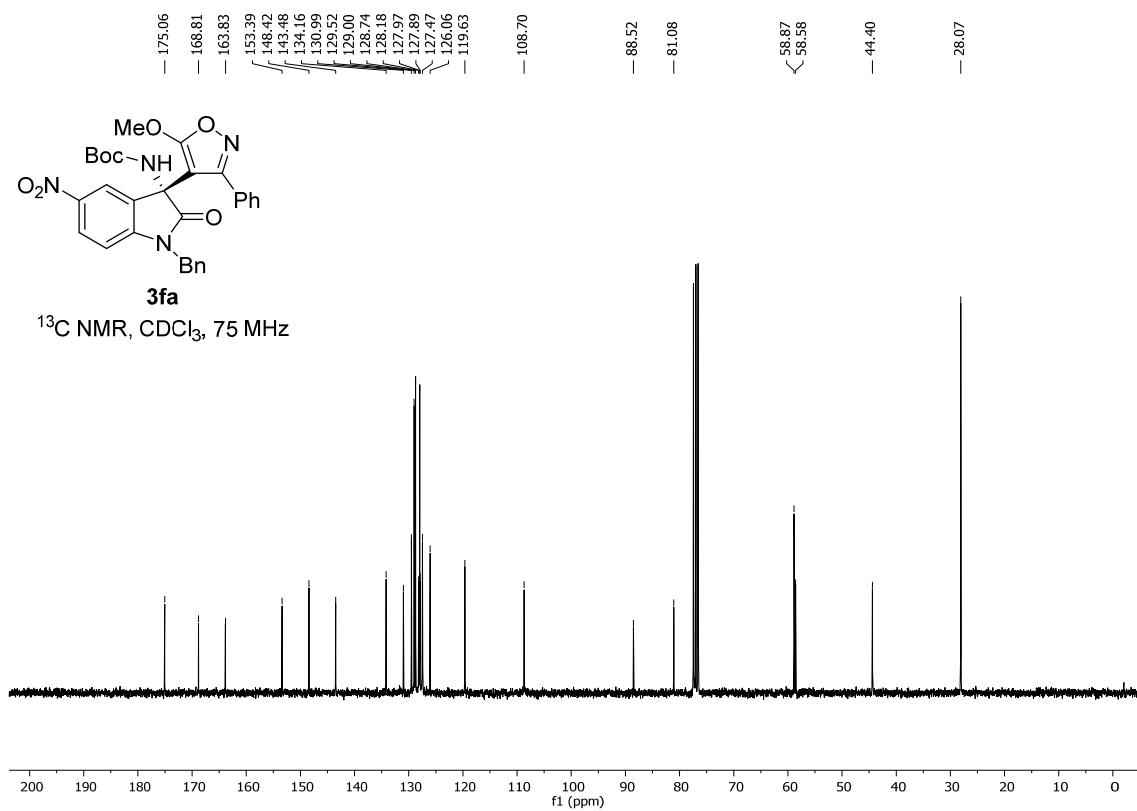

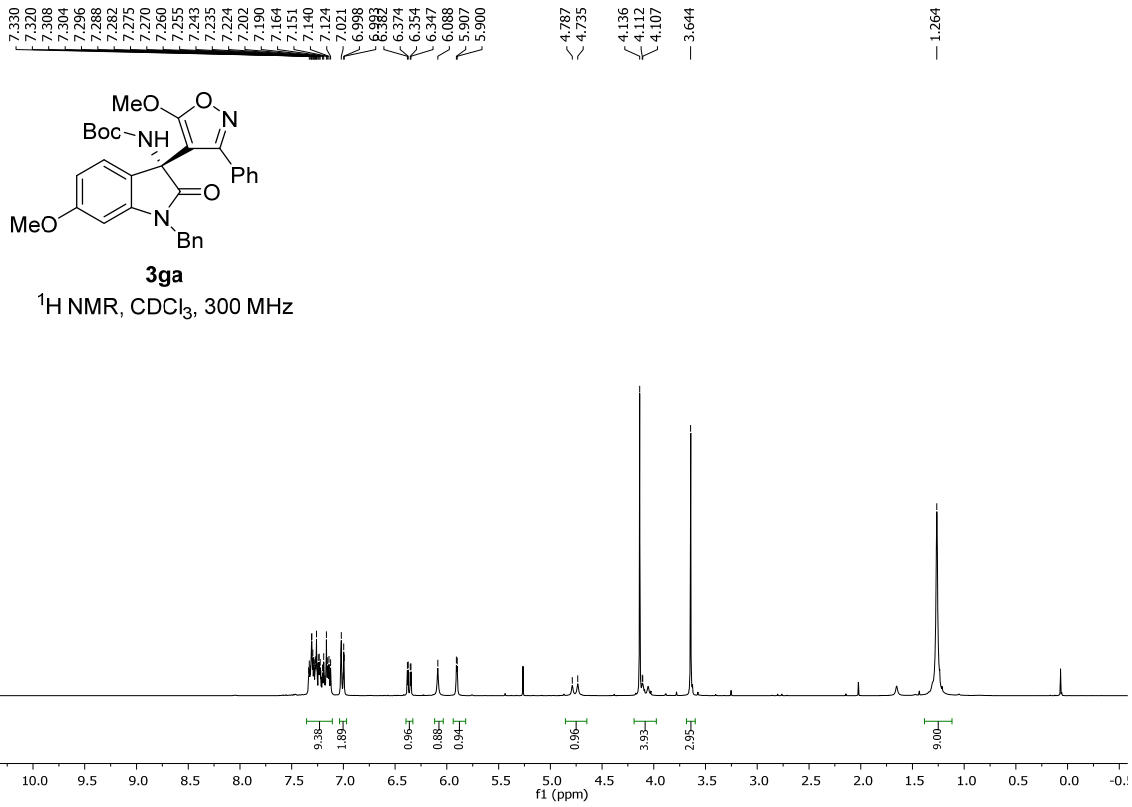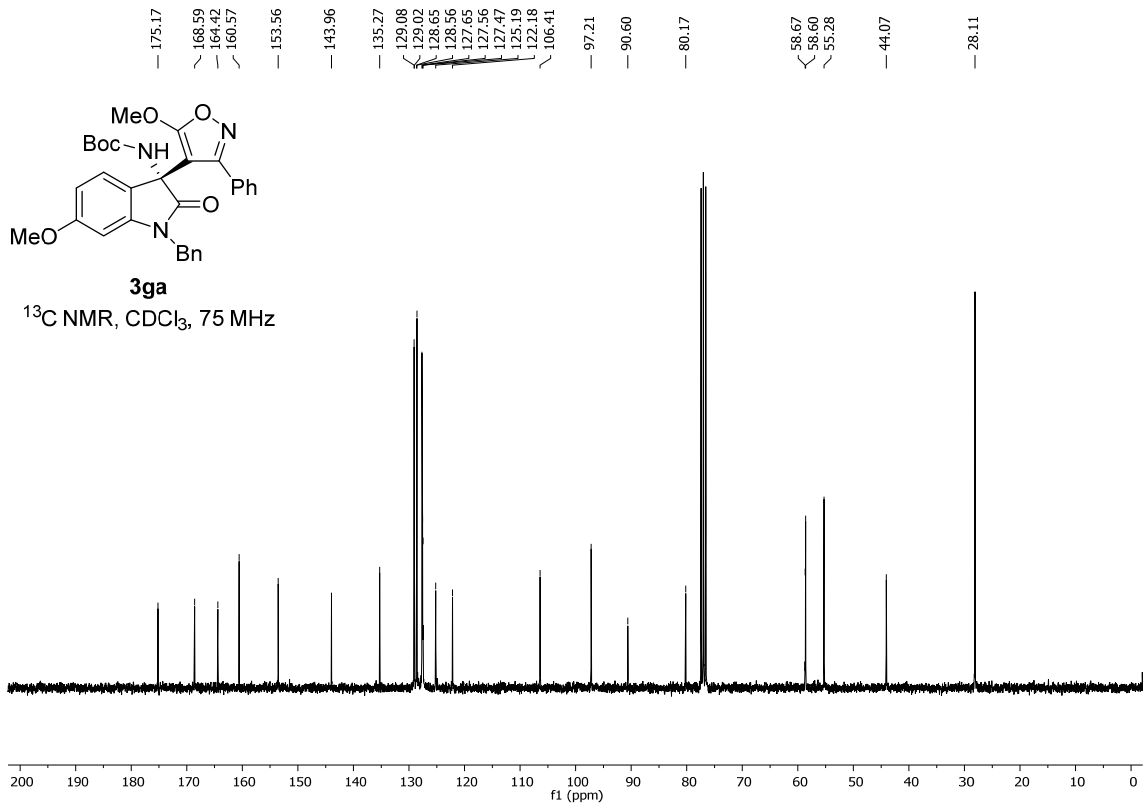

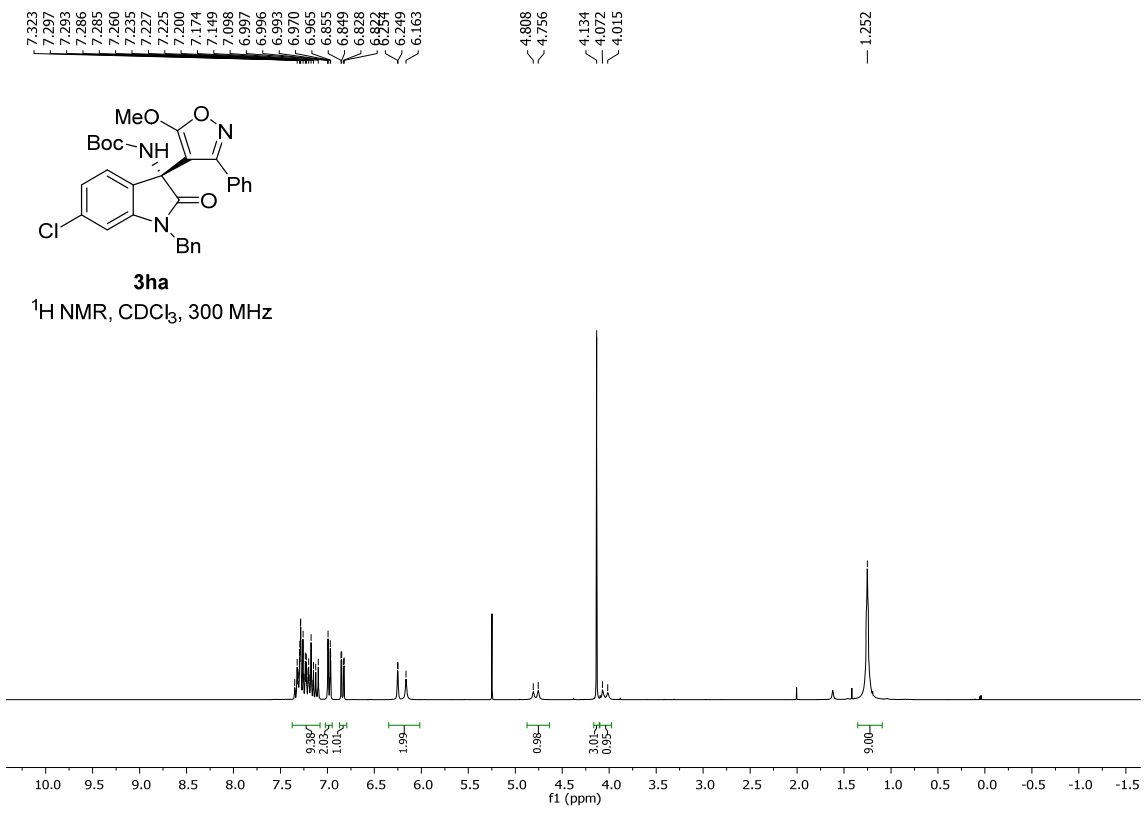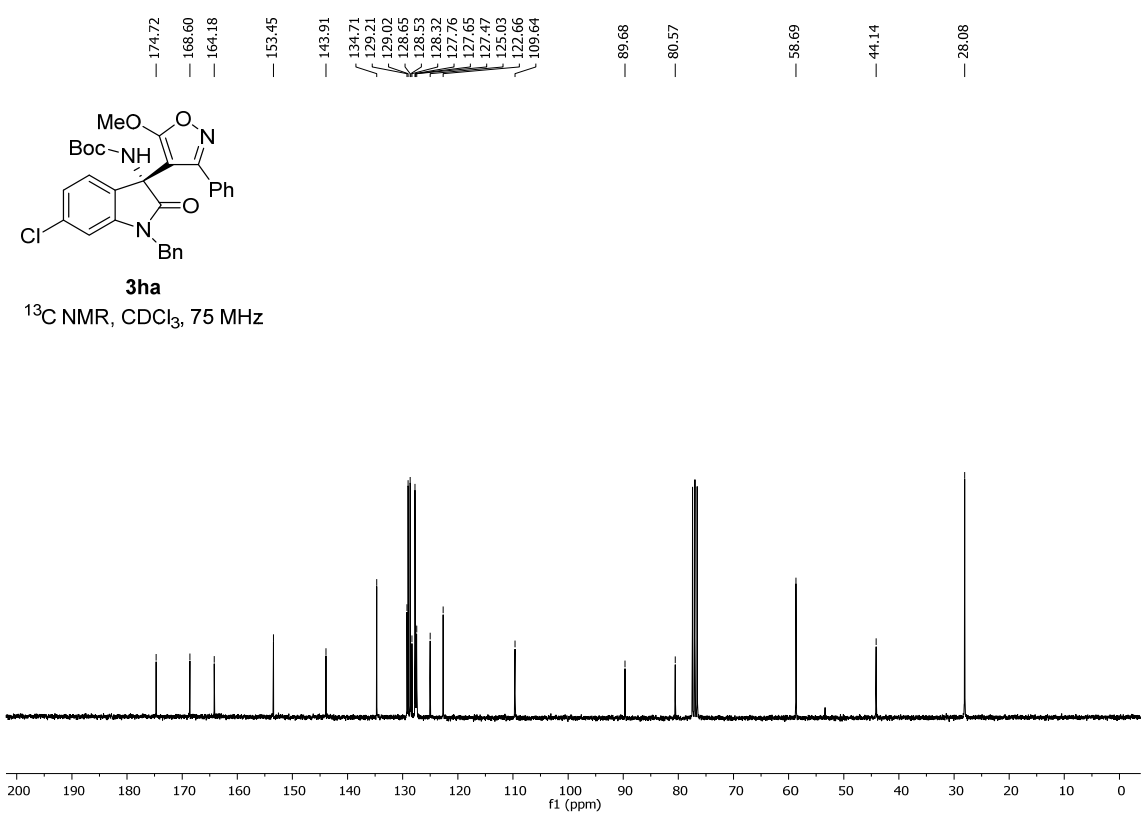



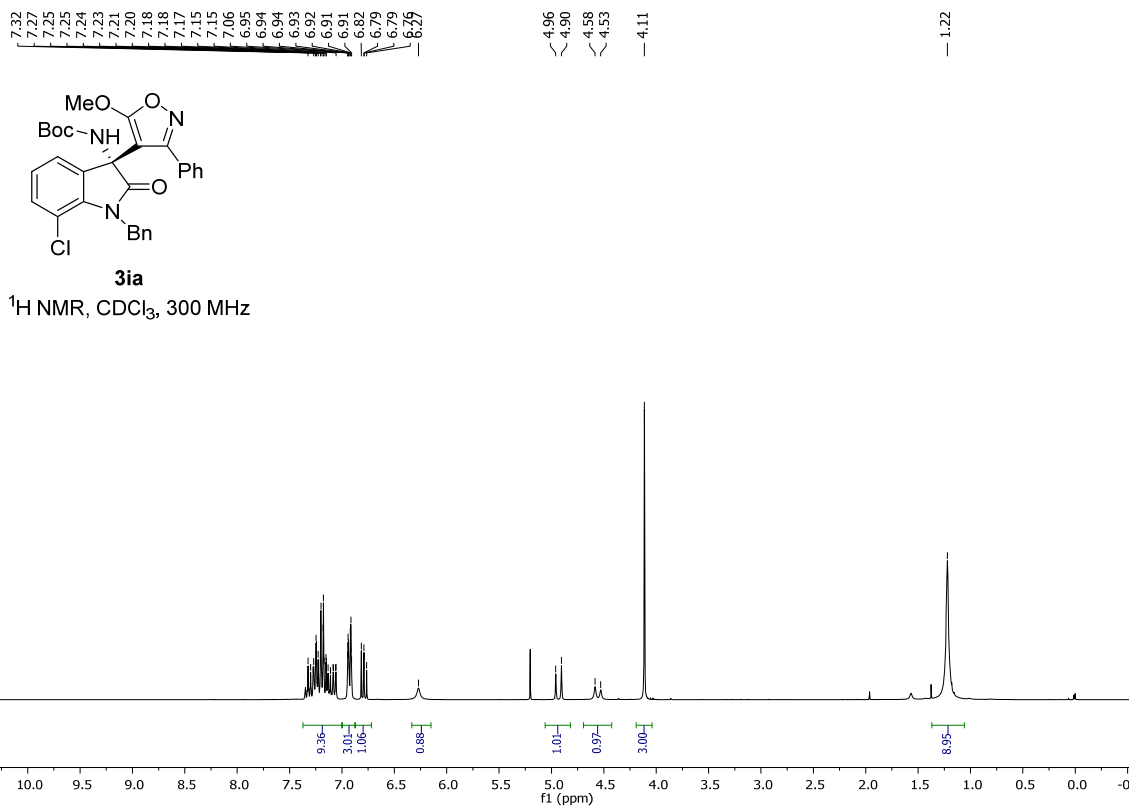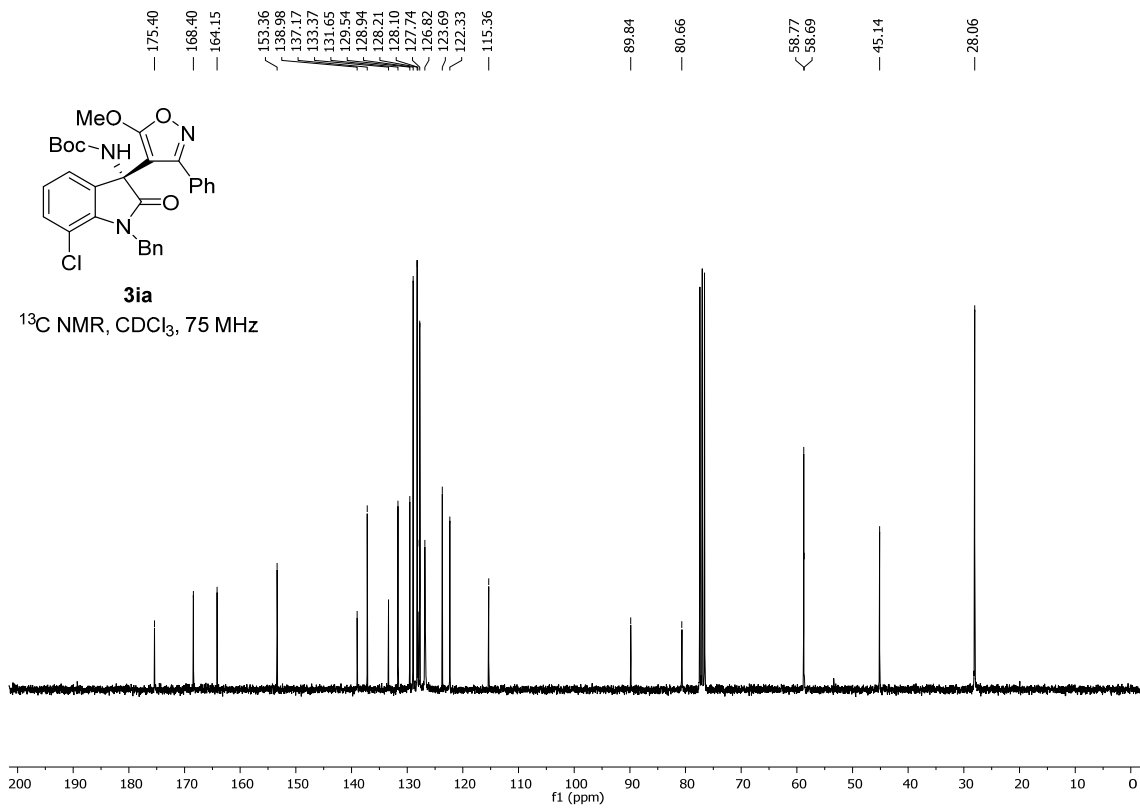

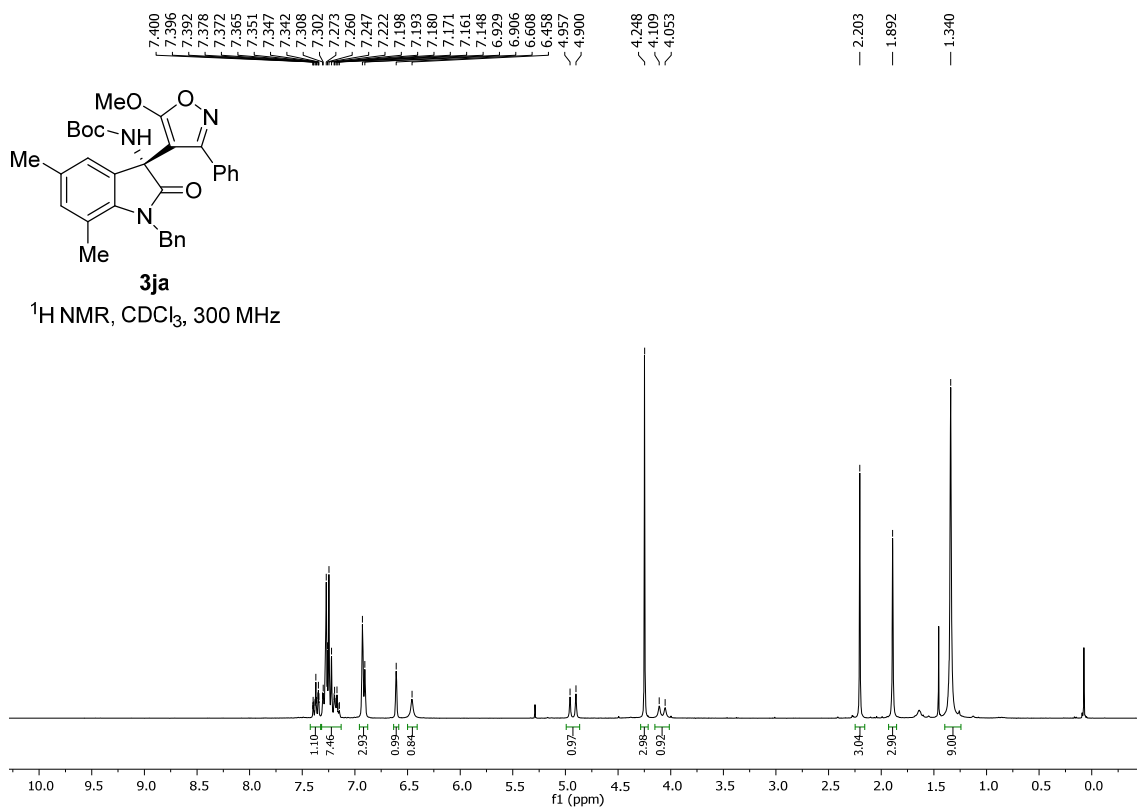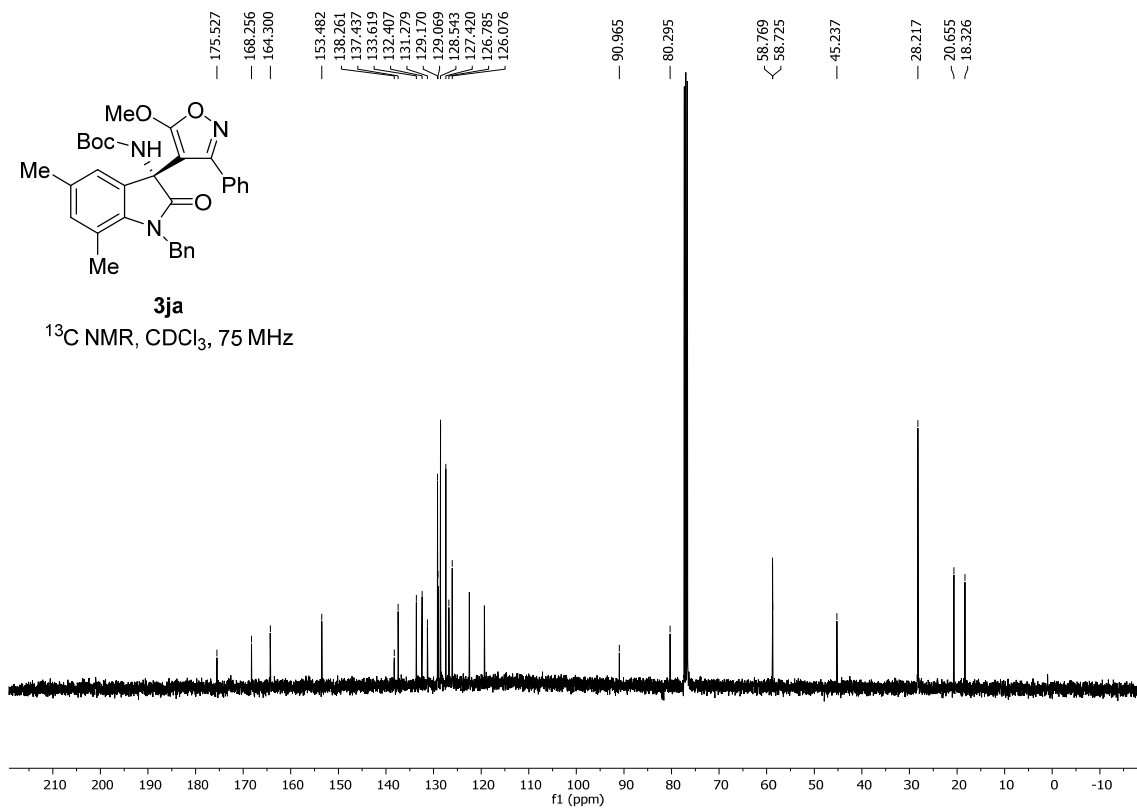

7.372  
7.365  
7.360  
7.348  
7.321  
7.286  
7.281  
7.276  
7.260  
7.255  
7.250  
7.241  
7.236  
7.233  
7.229  
7.225  
7.097  
7.094  
7.072  
7.070  
7.047  
6.940  
6.917  
6.463

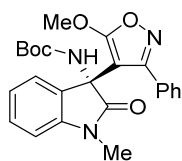

**3ka**

$^1\text{H NMR}$ ,  $\text{CDCl}_3$ , 300 MHz

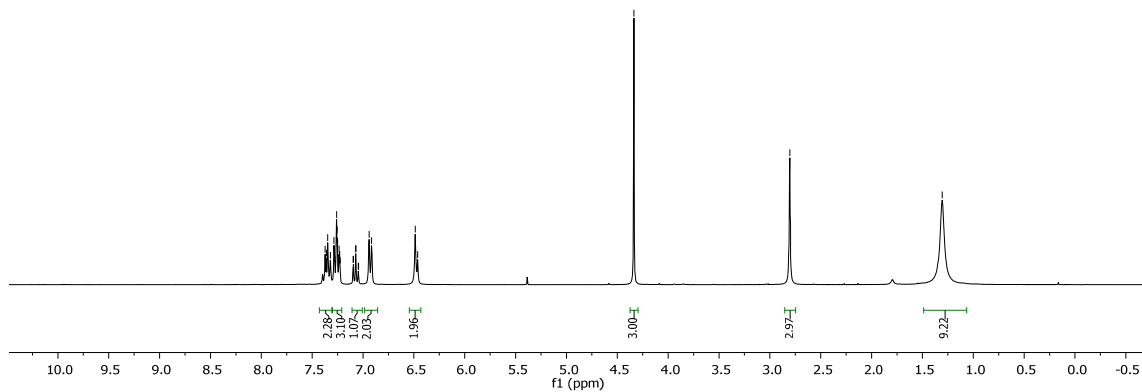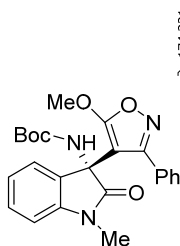

**3ka**

$^{13}\text{C NMR}$ ,  $\text{CDCl}_3$ , 75 MHz

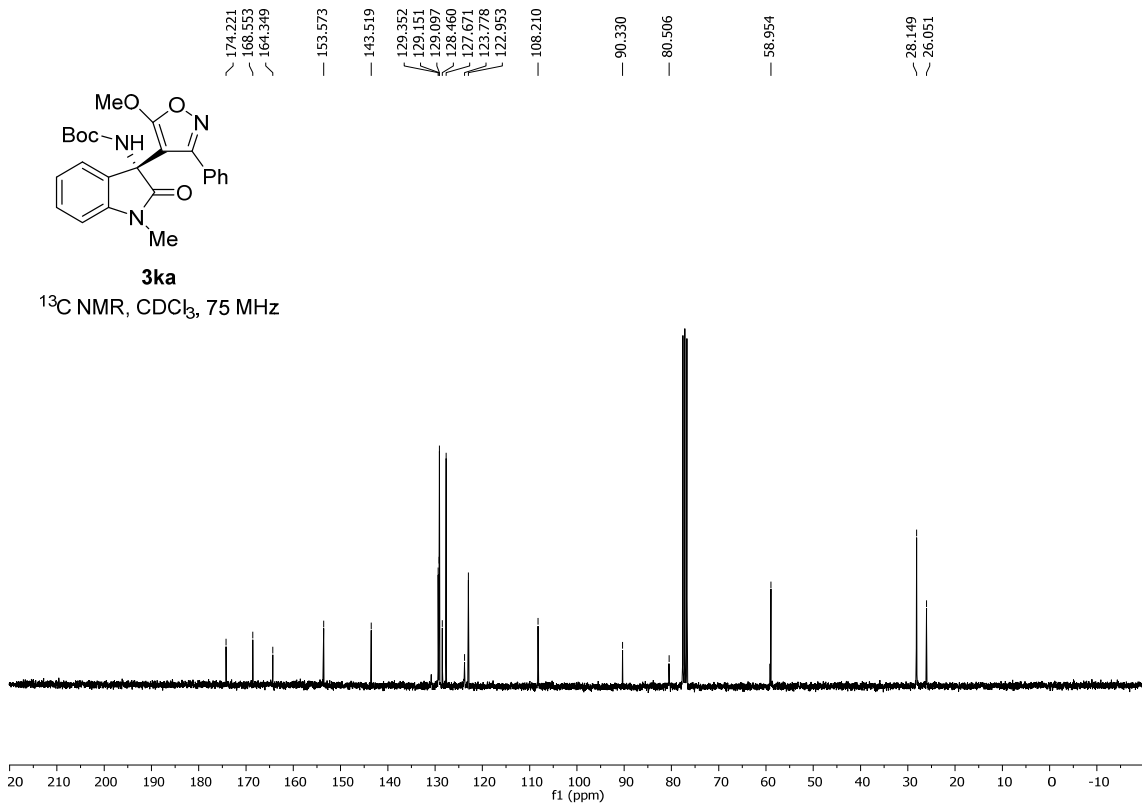

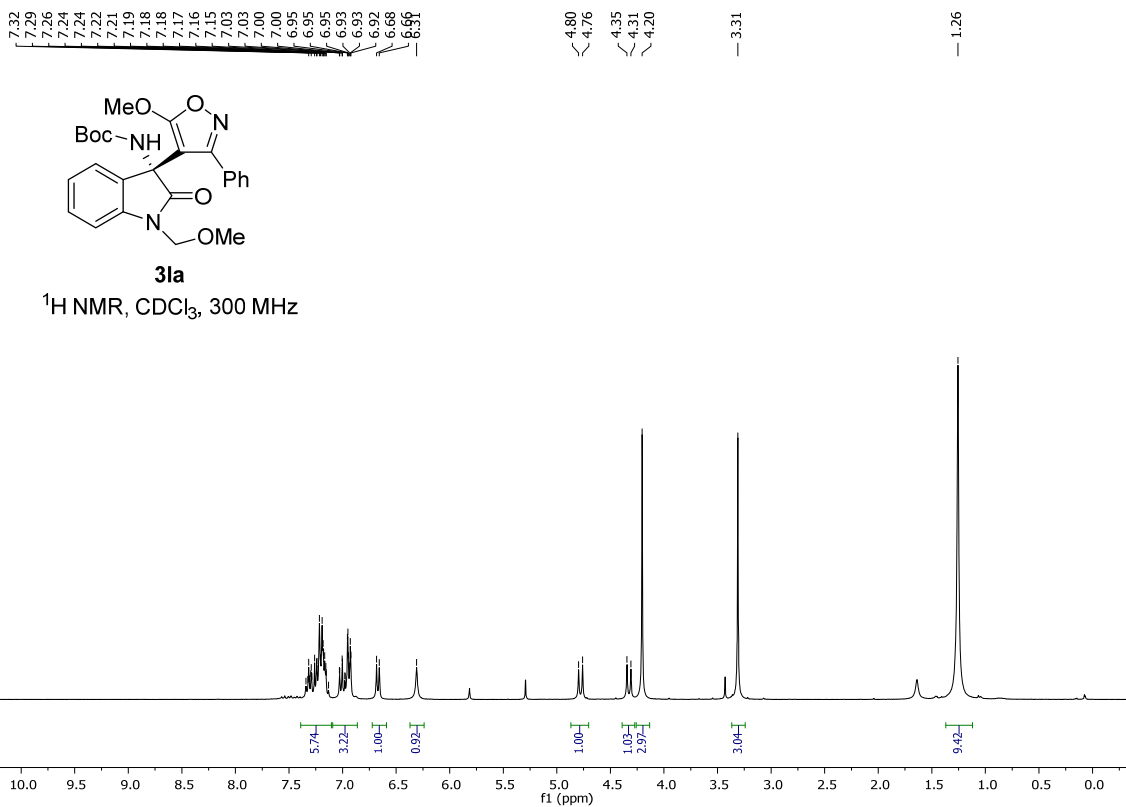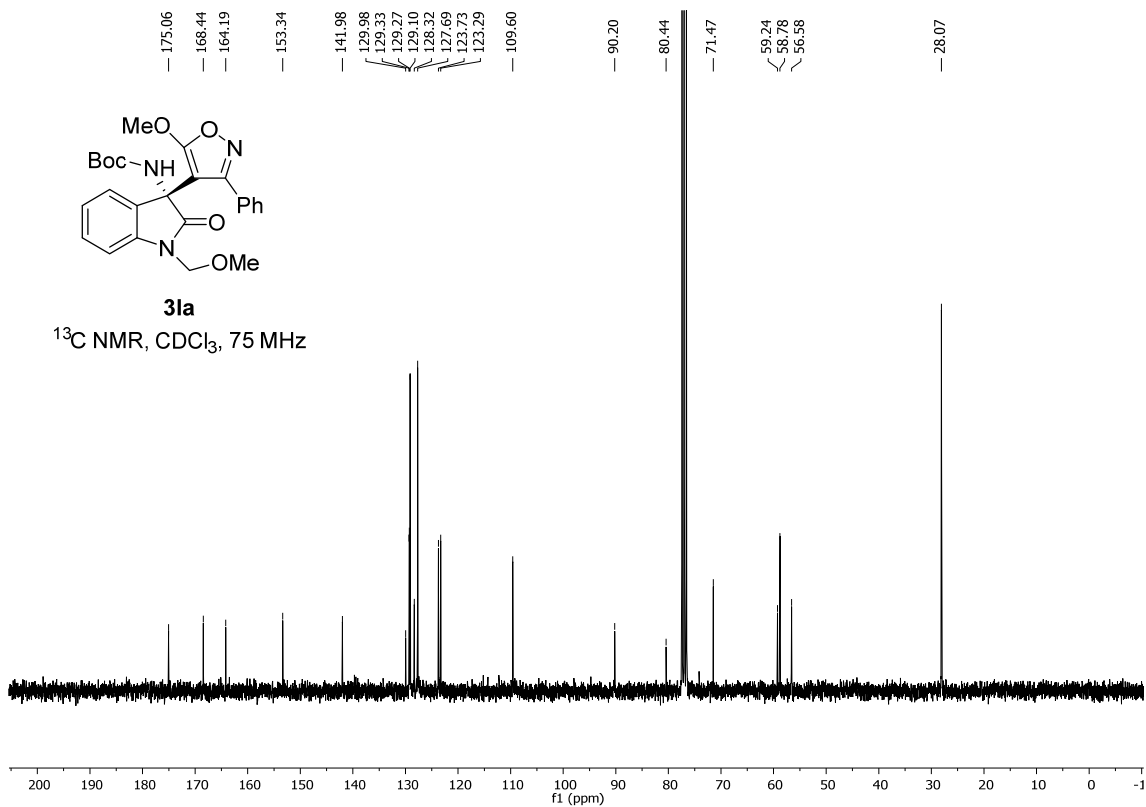

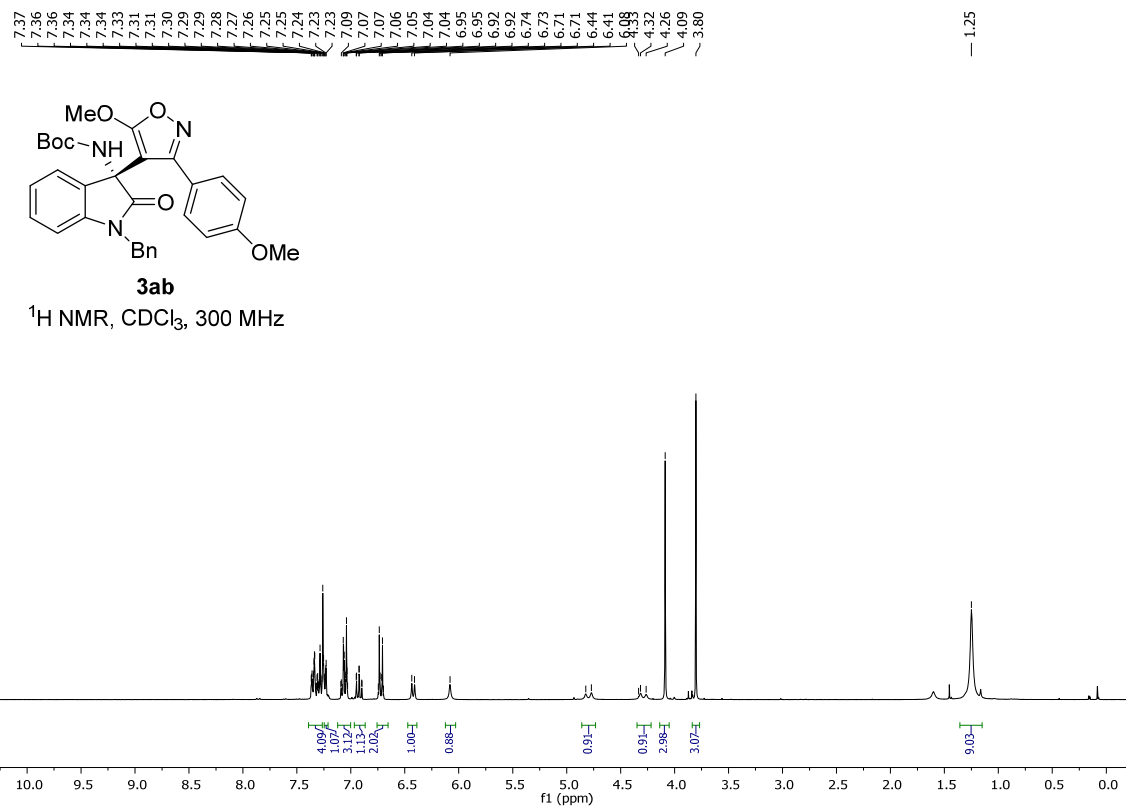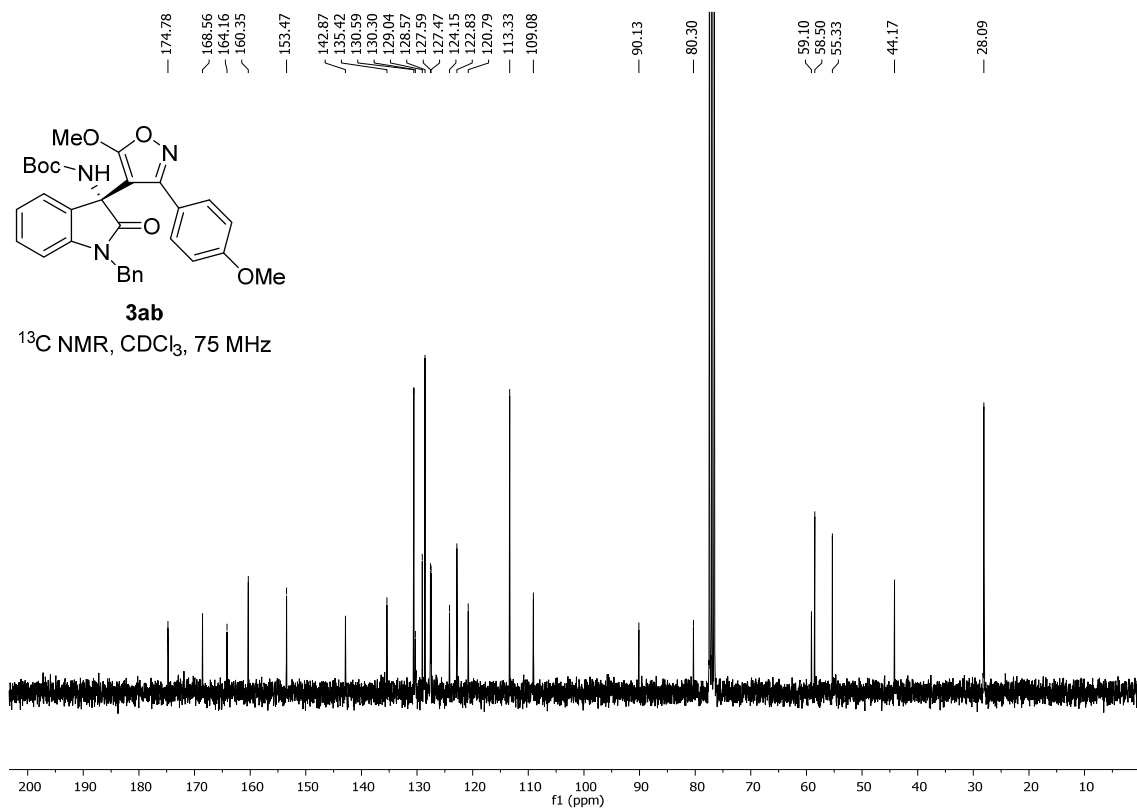

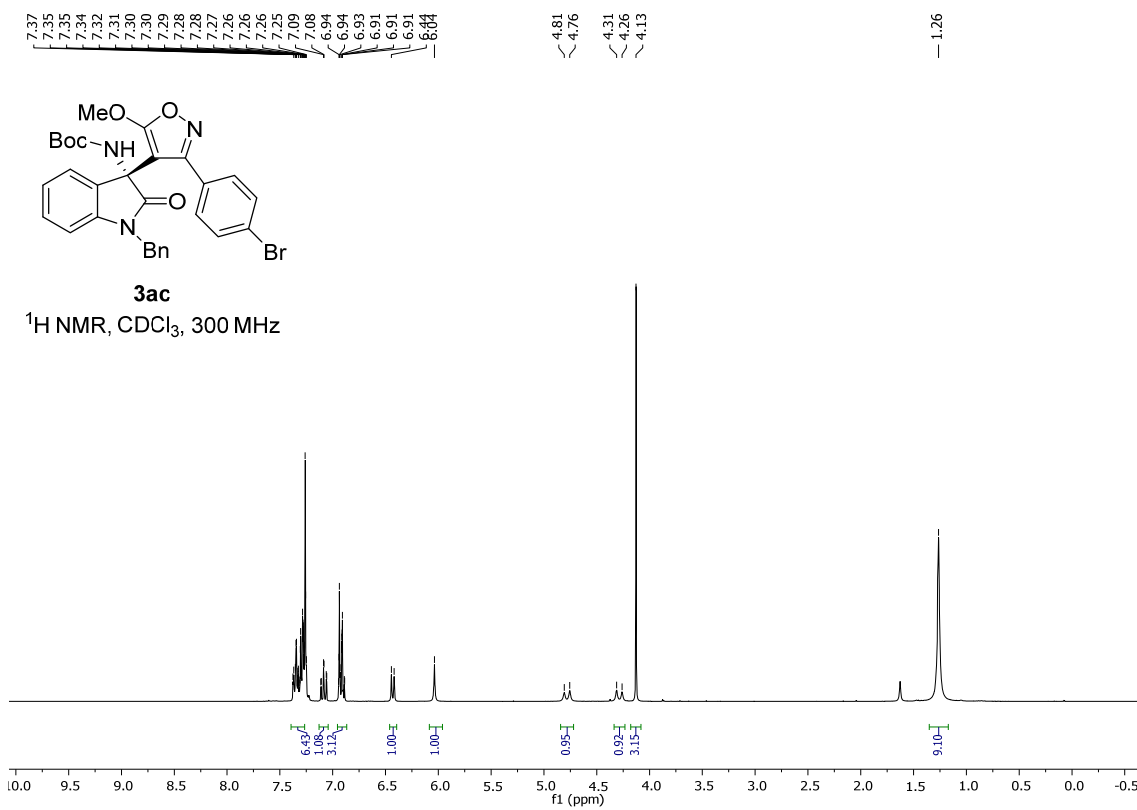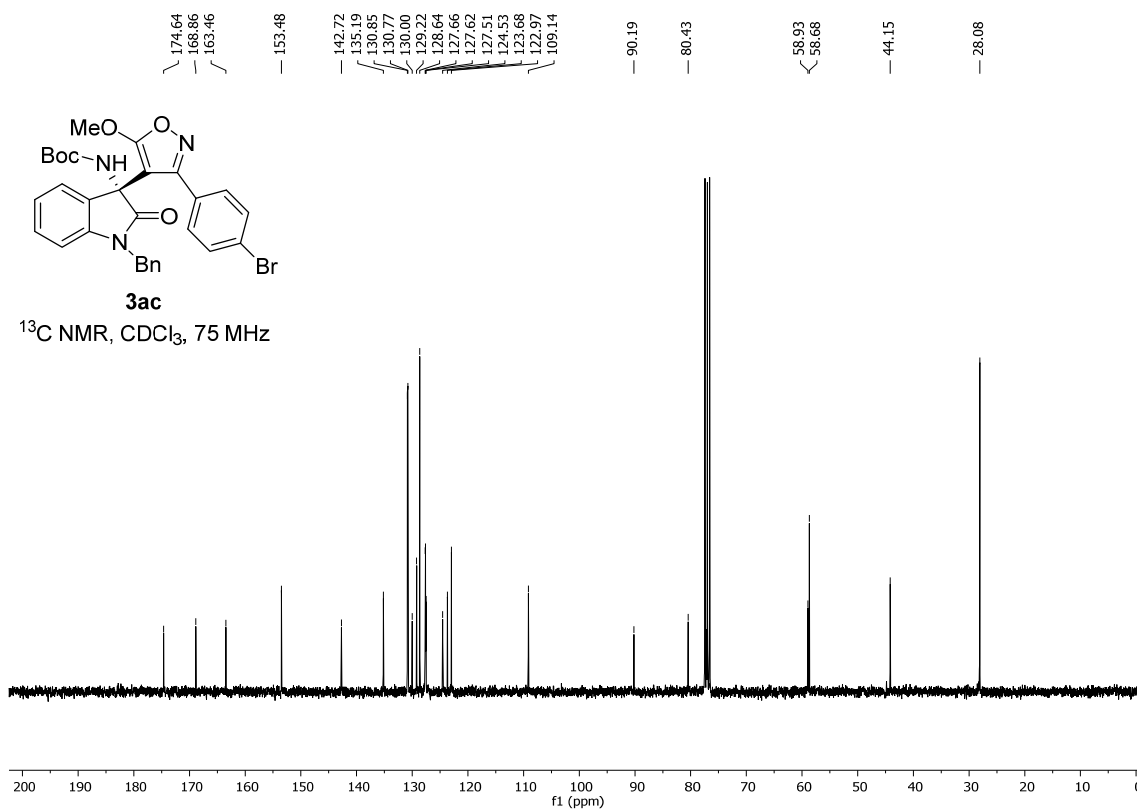

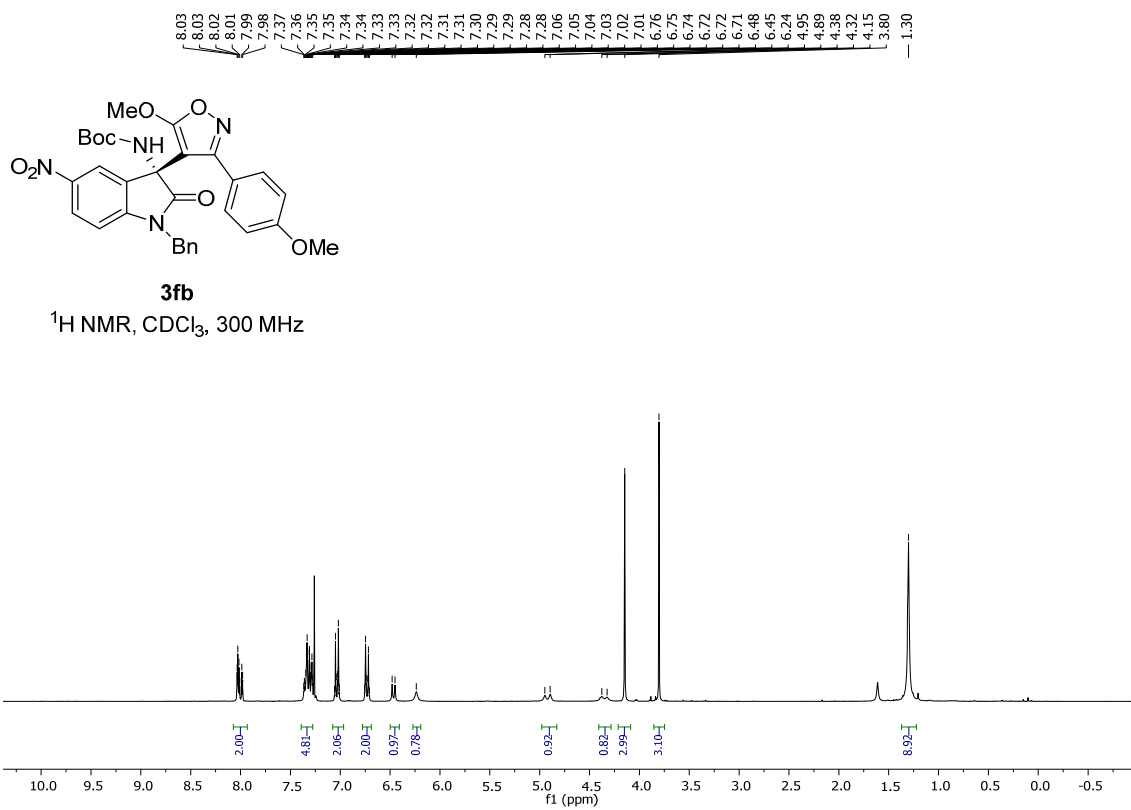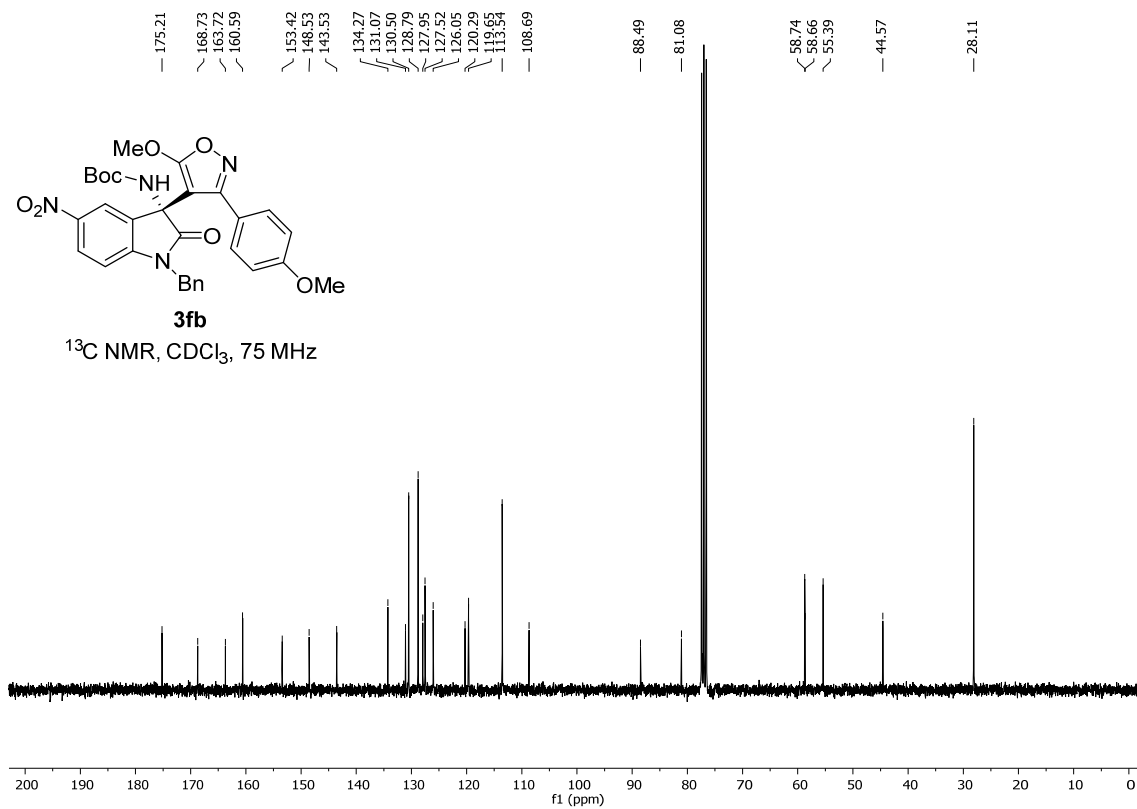

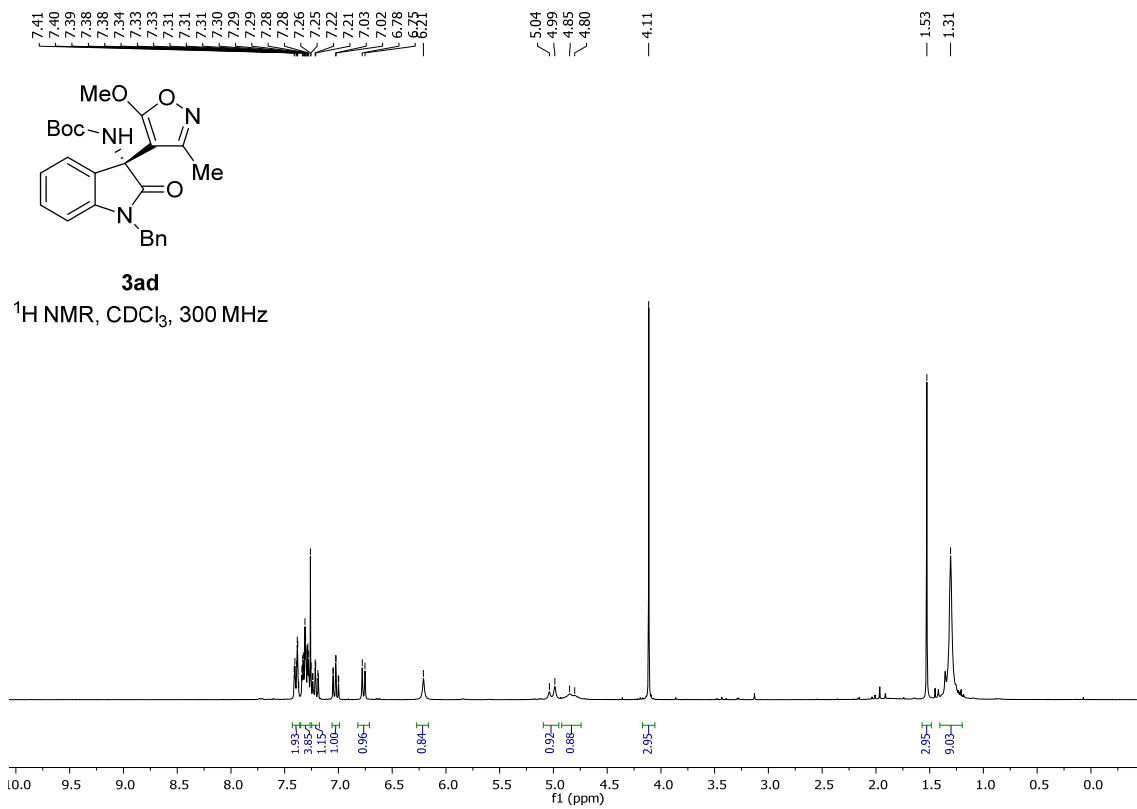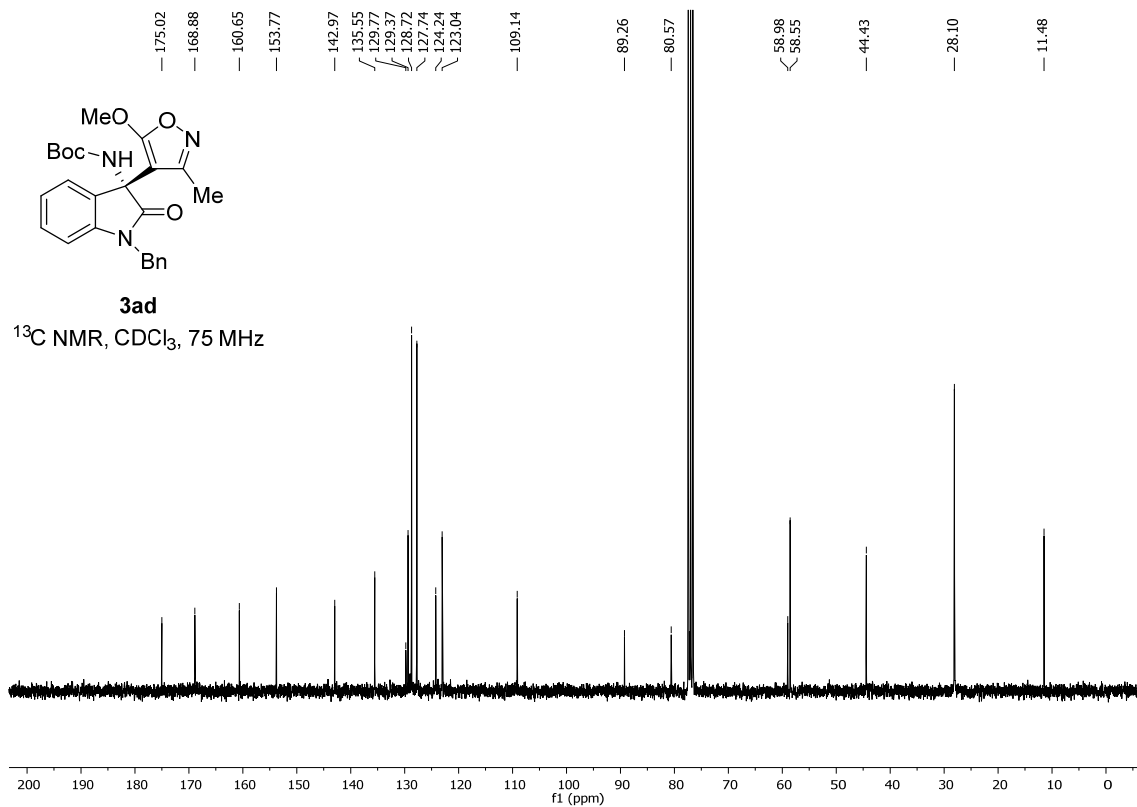



7.43  
7.42  
7.41  
7.40  
7.39  
7.36  
7.35  
7.34  
7.33  
7.32  
7.32  
7.31  
7.31  
7.30  
7.30  
7.29  
7.28  
7.28  
7.27  
7.27  
7.26  
7.25  
7.22  
7.22  
7.20  
7.19  
7.17  
7.17  
7.04  
7.04  
7.02  
7.01  
6.99  
6.99  
6.75  
6.73  
6.26  
4.95  
4.93  
4.02  
1.30  
0.76  
0.75  
0.75  
0.74  
0.73  
0.72  
0.71  
0.53  
0.53  
0.52  
0.52  
0.51  
0.51  
0.50  
0.49  
0.48  
0.47  
0.46  
0.45  
0.45  
0.44  
0.44

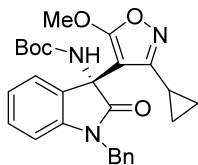

**3ae**

$^1\text{H NMR}$ ,  $\text{CDCl}_3$ , 300 MHz

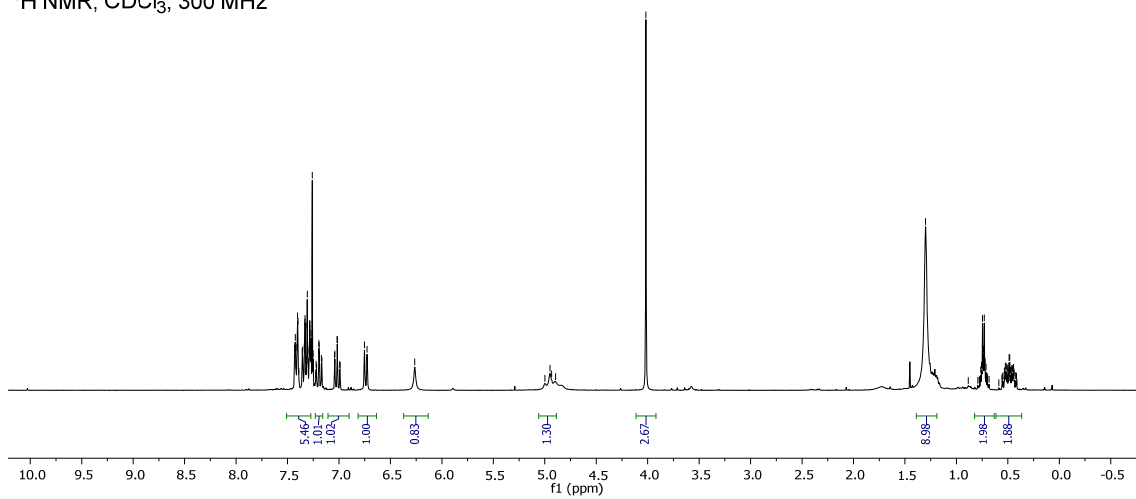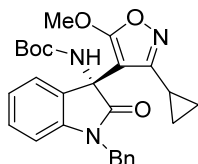

**3ae**

$^{13}\text{C NMR}$ ,  $\text{CDCl}_3$ , 75 MHz

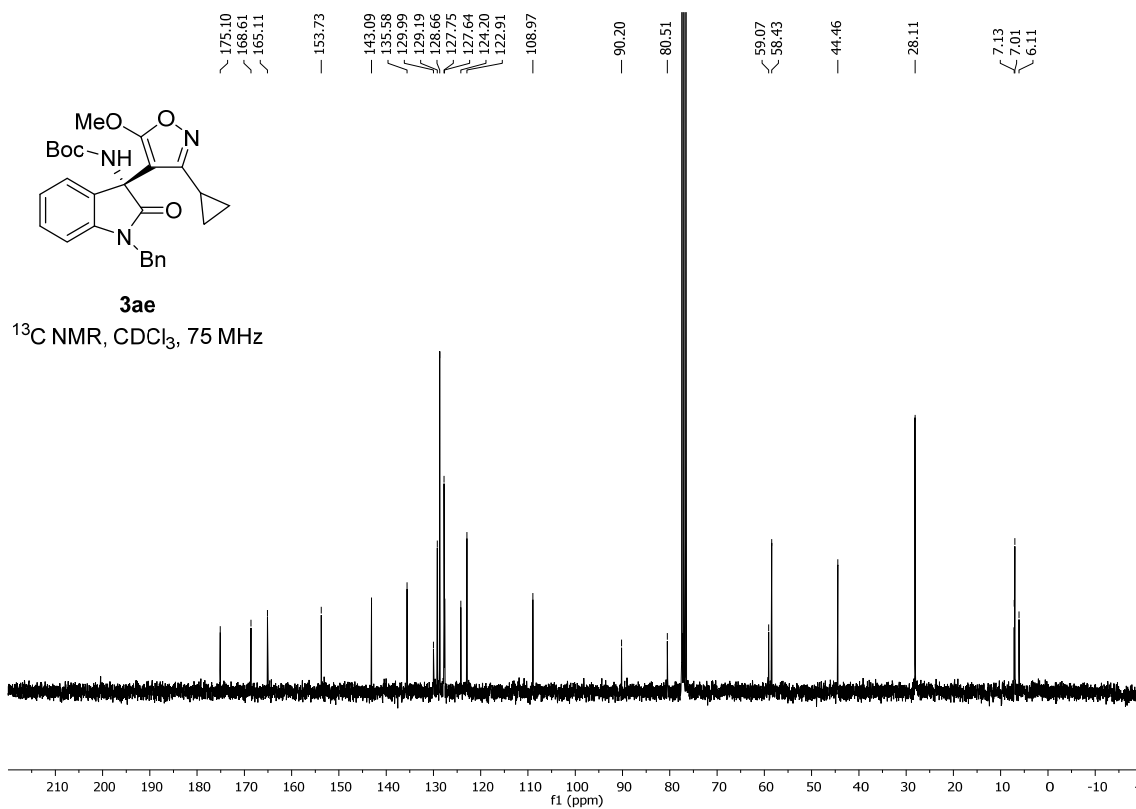

7.61  
7.60  
7.59  
7.58  
7.57  
7.56  
7.55  
7.49  
7.49  
7.47  
7.46  
7.44  
7.43  
7.43  
7.42  
7.42  
7.41  
7.40  
7.39  
7.36  
7.36  
7.33  
7.32  
7.32  
7.31  
7.29  
7.28  
7.26  
7.25  
7.25  
7.24  
7.24  
7.23  
7.23  
7.22  
7.22  
7.21  
7.21  
7.20  
7.19  
7.19  
7.18  
7.17  
7.17  
7.15  
7.15  
7.09  
7.09  
7.06  
7.06  
7.00  
7.00  
6.97  
6.15  
6.12  
4.86  
4.80  
4.62  
4.57  
3.88  
2.83  
2.83  
1.37

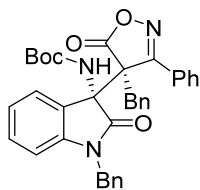

*syn-3af*

$^1\text{H NMR}$ ,  $\text{CDCl}_3$ , 300 MHz

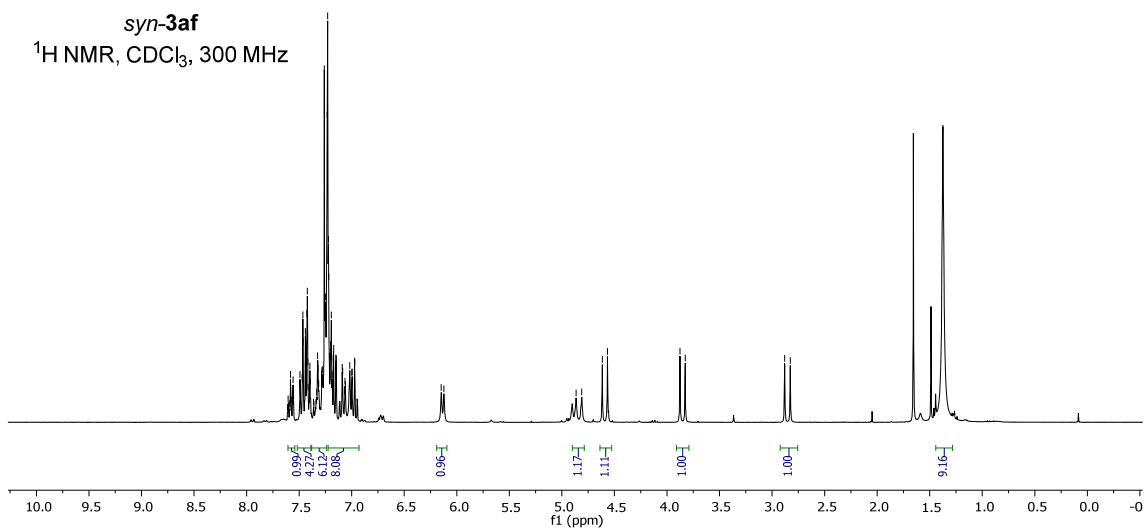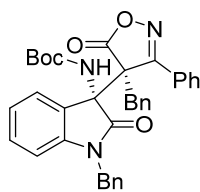

*syn-3ah*

$^{13}\text{C NMR}$ ,  $\text{CDCl}_3$ , 75 MHz

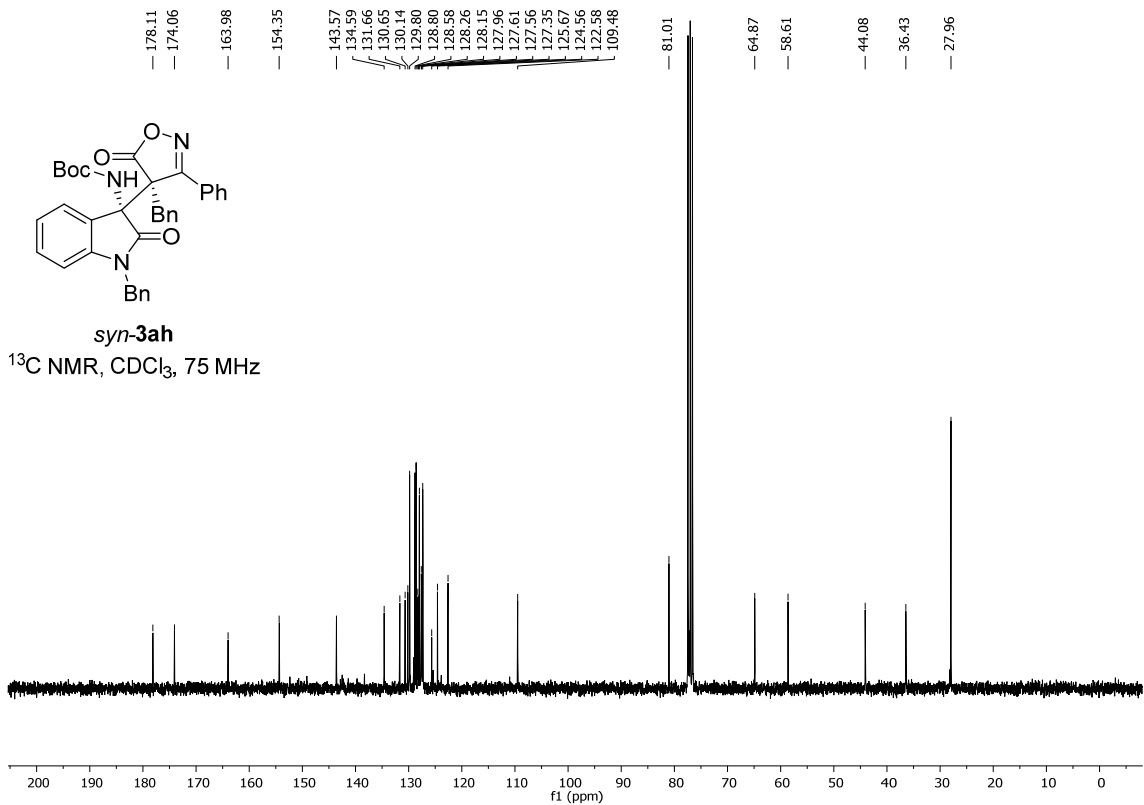

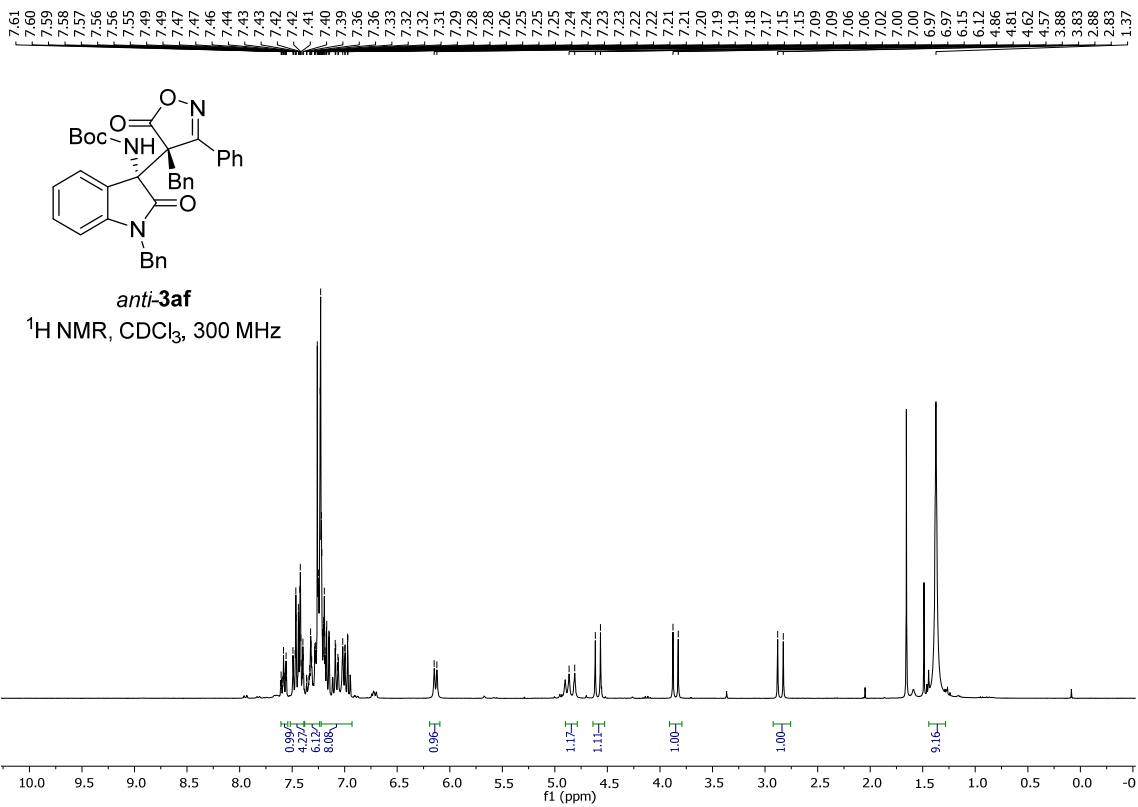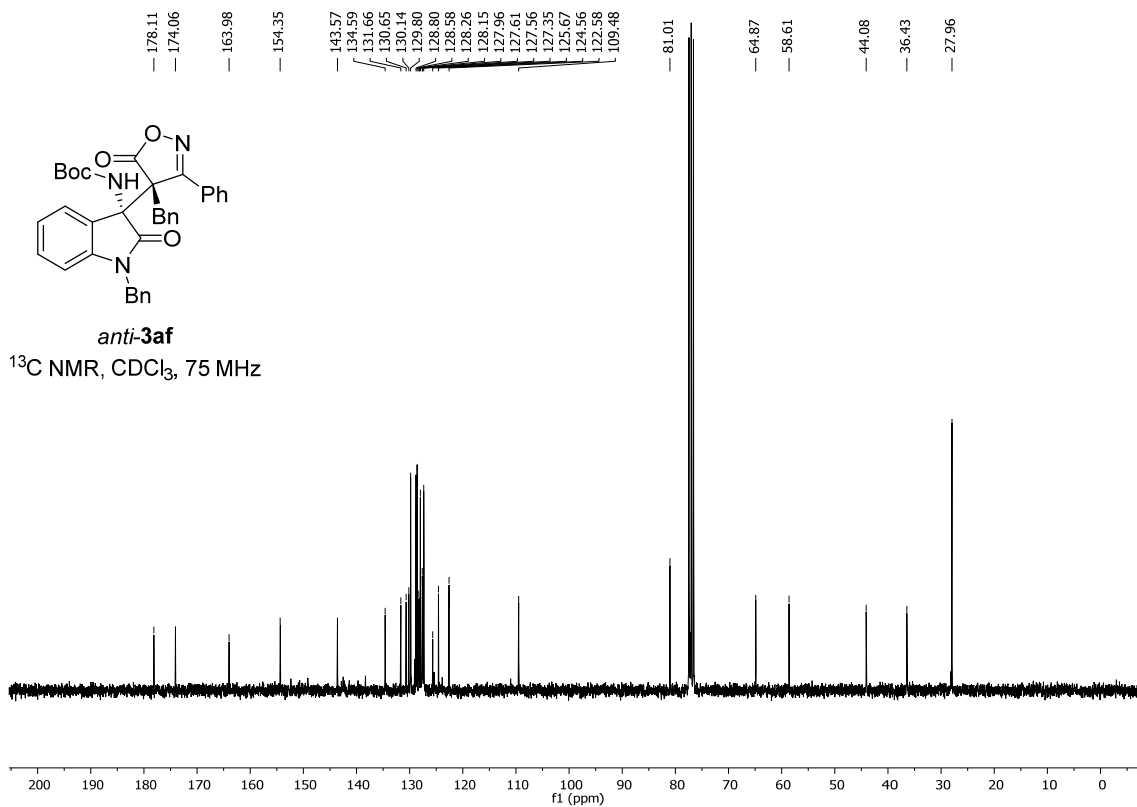

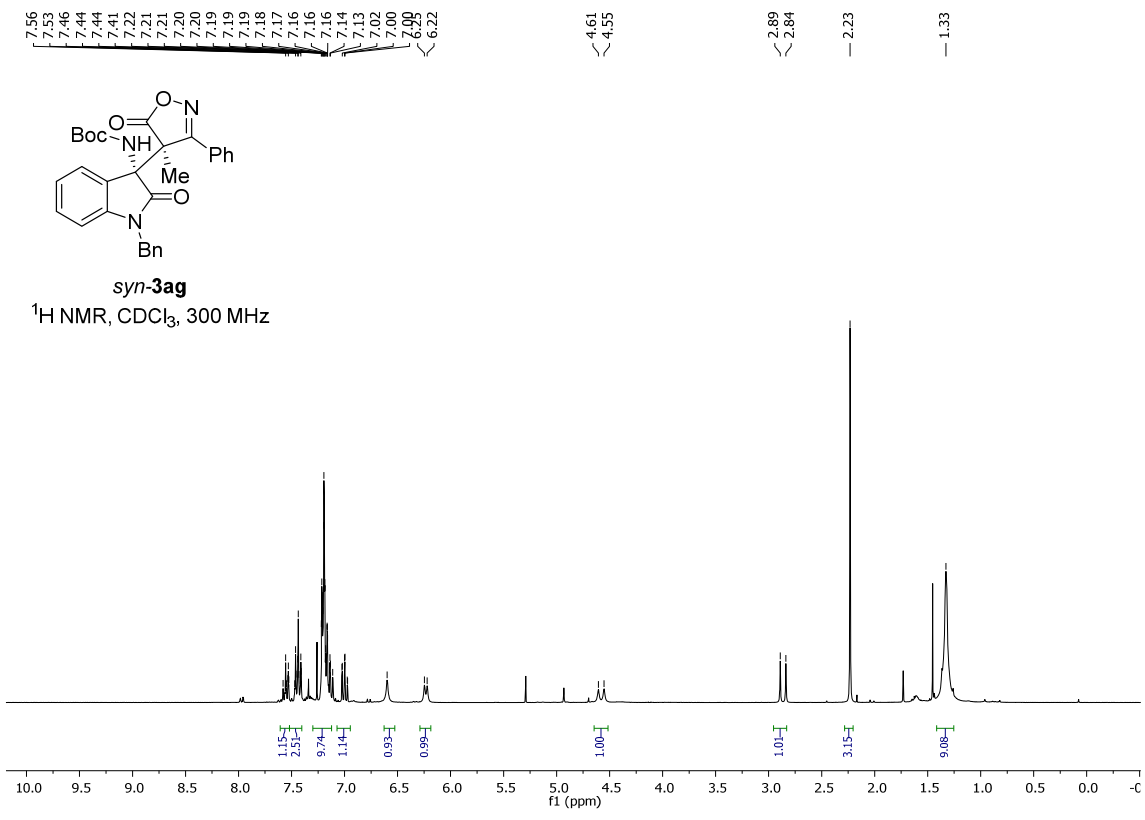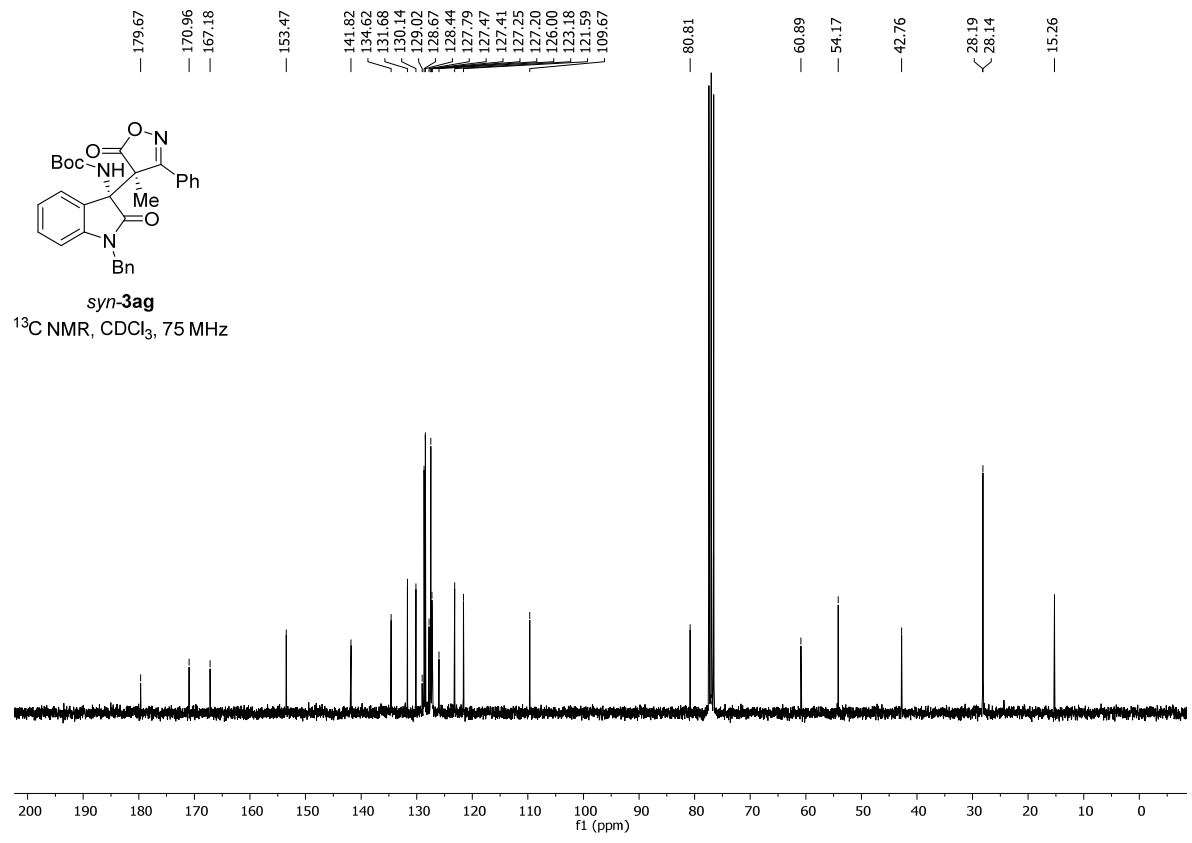

7.40  
7.39  
7.38  
7.37  
7.37  
7.29  
7.28  
7.27  
7.27  
7.26  
7.25  
7.25  
7.24  
7.24  
7.23  
7.23  
7.22  
7.21  
7.21  
7.19  
7.19  
7.04  
7.03  
7.02  
7.01  
7.01  
7.00  
7.00  
6.99  
6.99  
6.98  
6.98  
6.96  
6.95  
6.94  
6.94  
6.92  
6.92  
6.92  
6.91  
6.91  
6.90  
6.89  
6.89  
6.88  
6.88  
6.01  
6.01  
5.99  
5.98  
5.07  
5.01  
4.09  
4.09

1.23

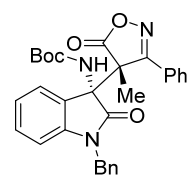

**anti-3ag**

<sup>1</sup>H NMR, CDCl<sub>3</sub>, 300 MHz

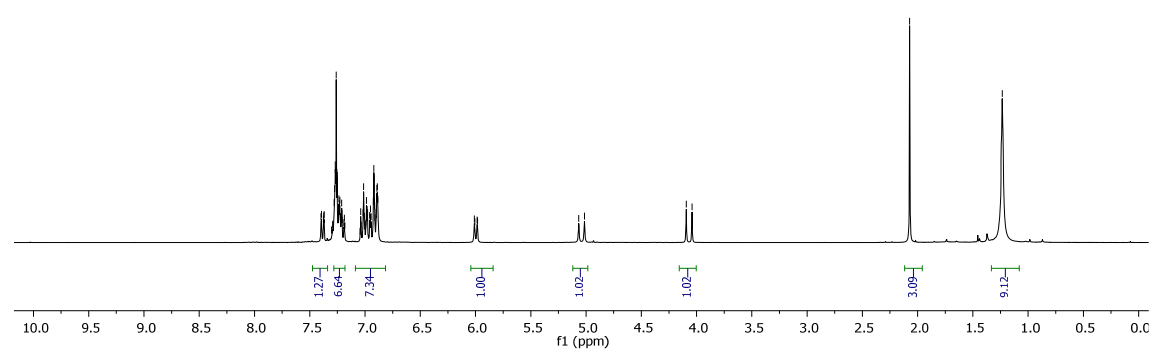

179.29  
174.11  
166.32  
154.22  
143.25  
134.71  
130.57  
130.00  
128.61  
127.93  
127.79  
127.75  
127.62  
126.92  
125.35  
124.23  
122.39  
109.20  
80.90  
77.42  
77.20  
77.00  
76.58  
64.43  
51.94  
44.15  
27.92  
17.95

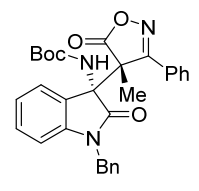

**anti-3ag'**

<sup>13</sup>C NMR, CDCl<sub>3</sub>, 75 MHz

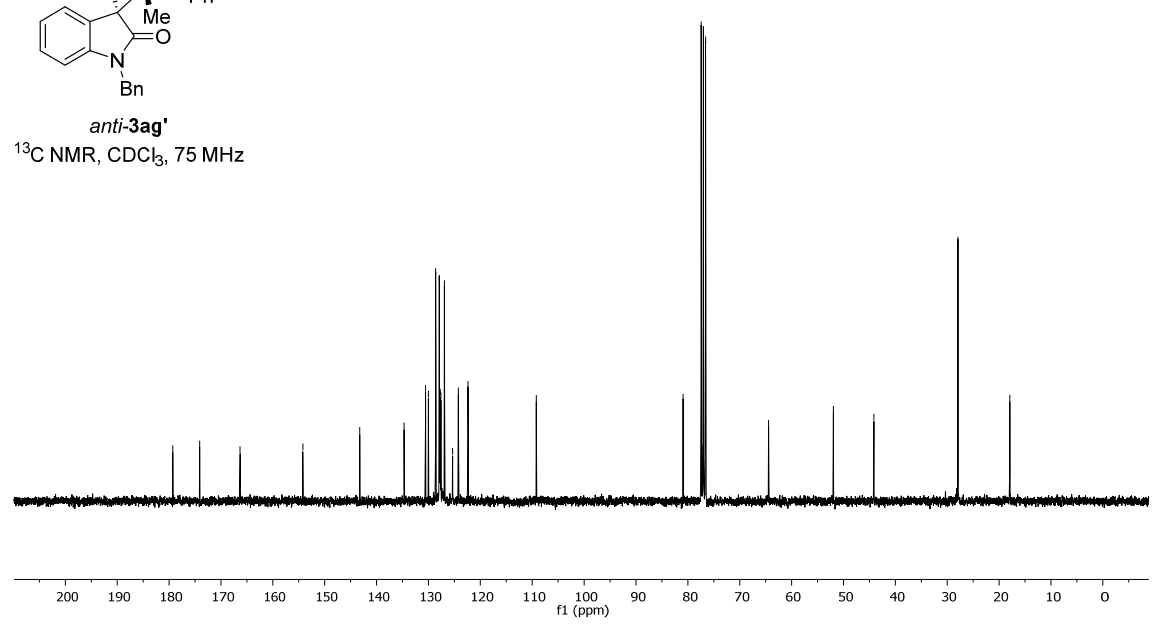

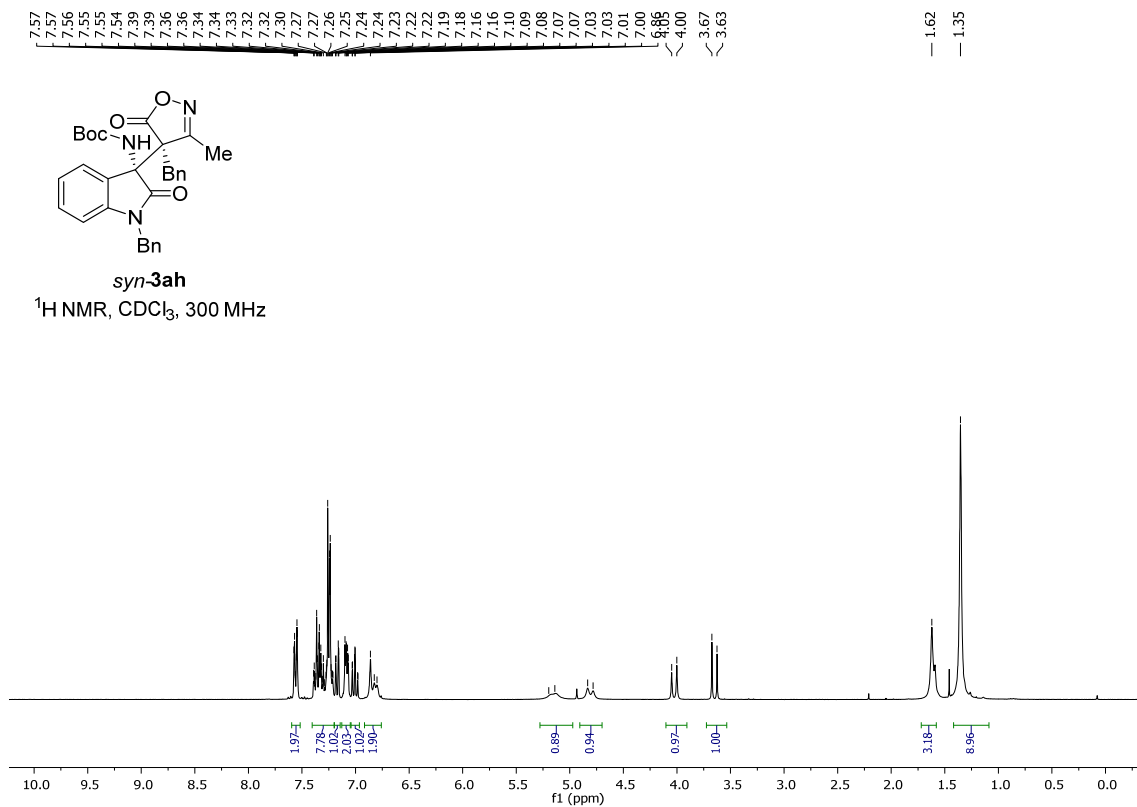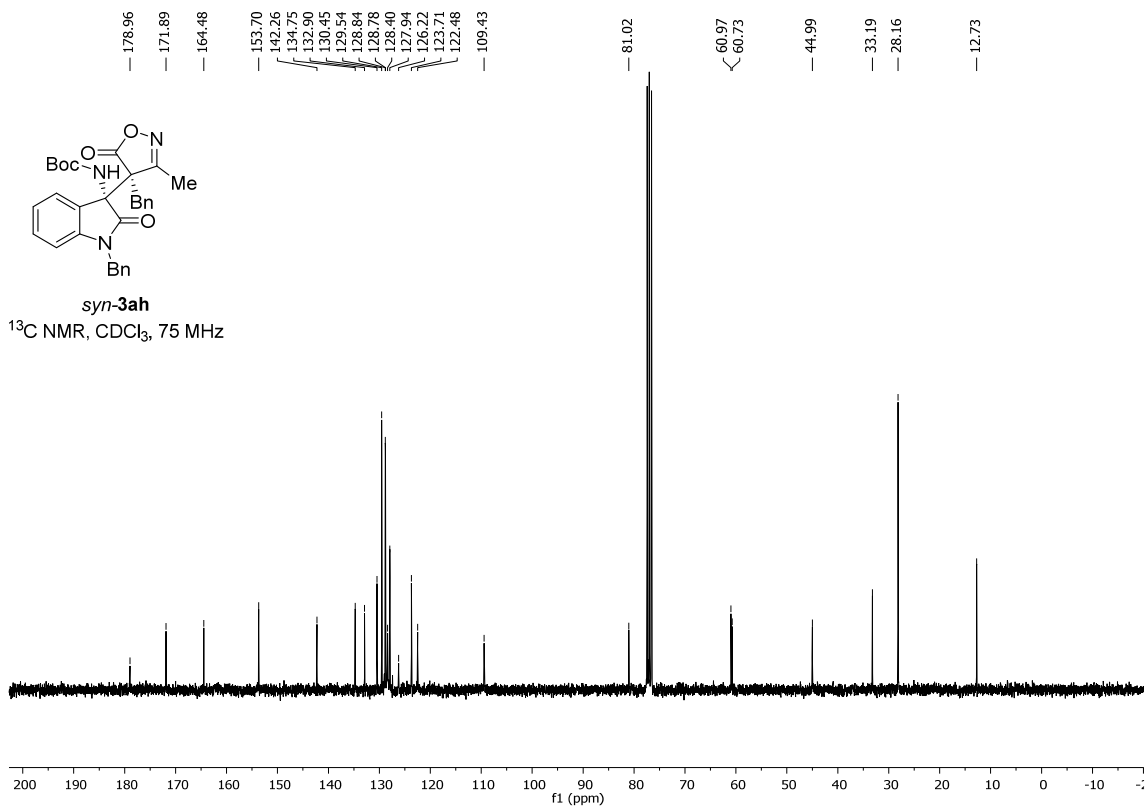

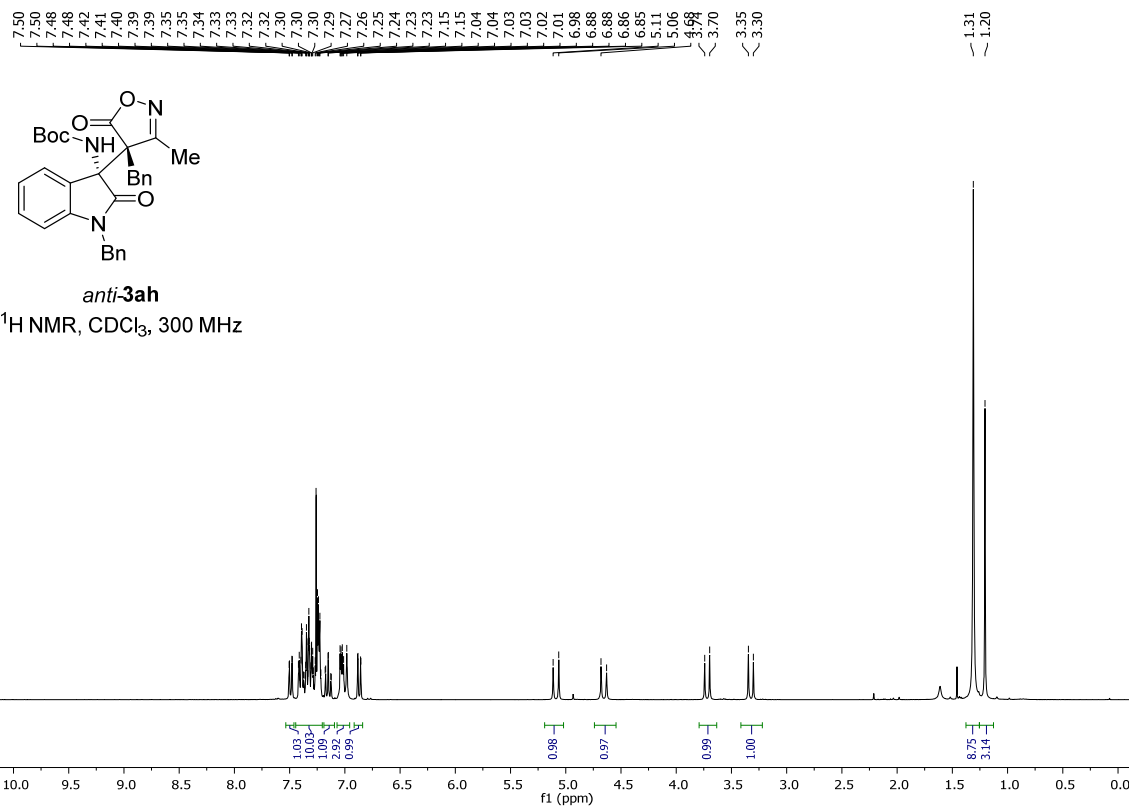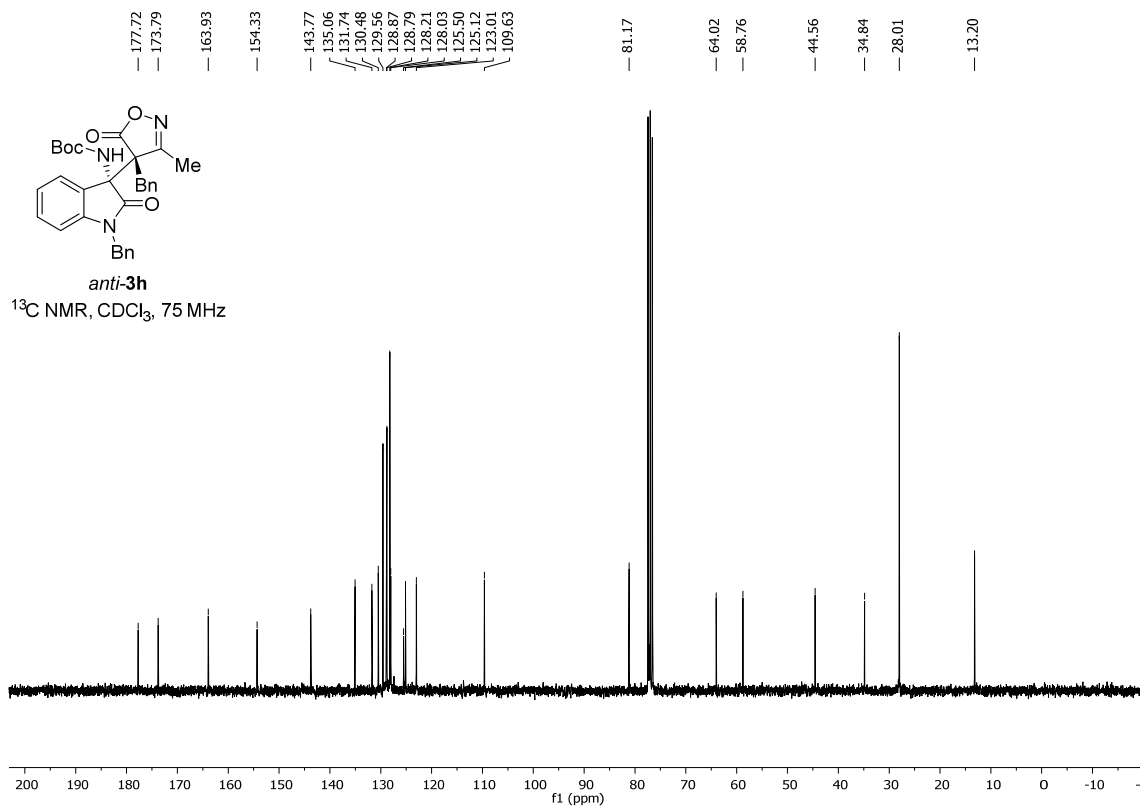

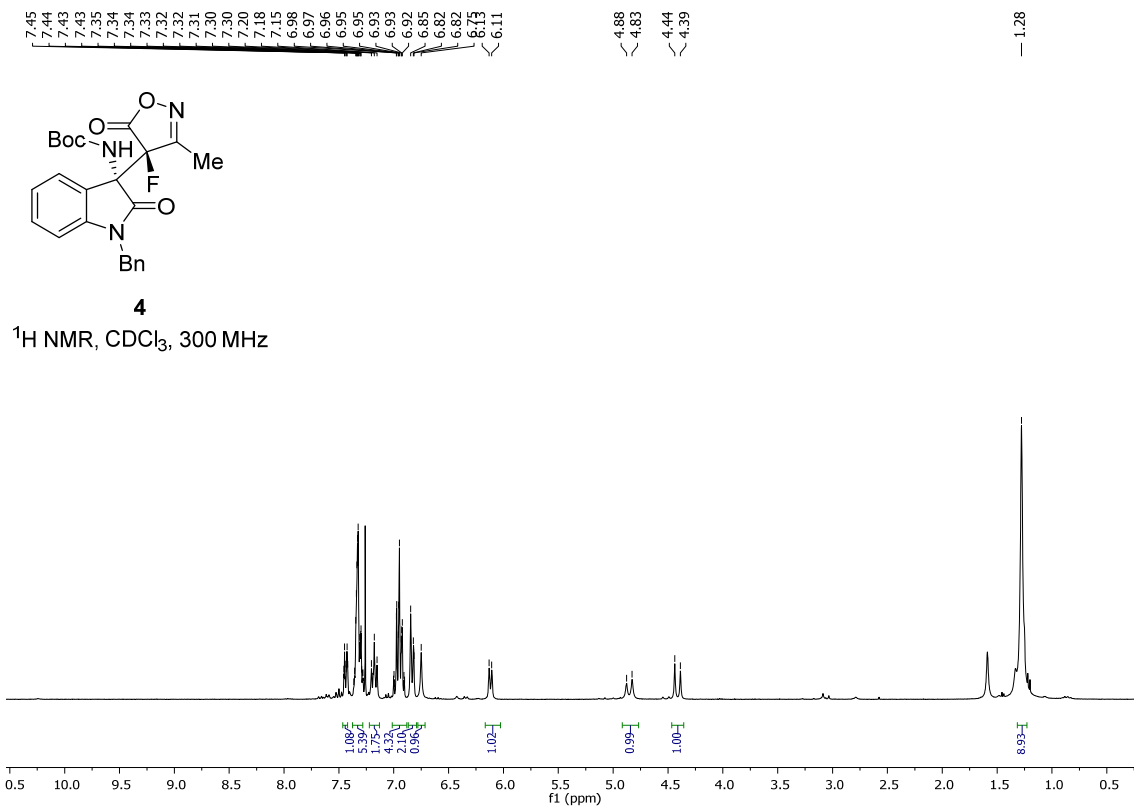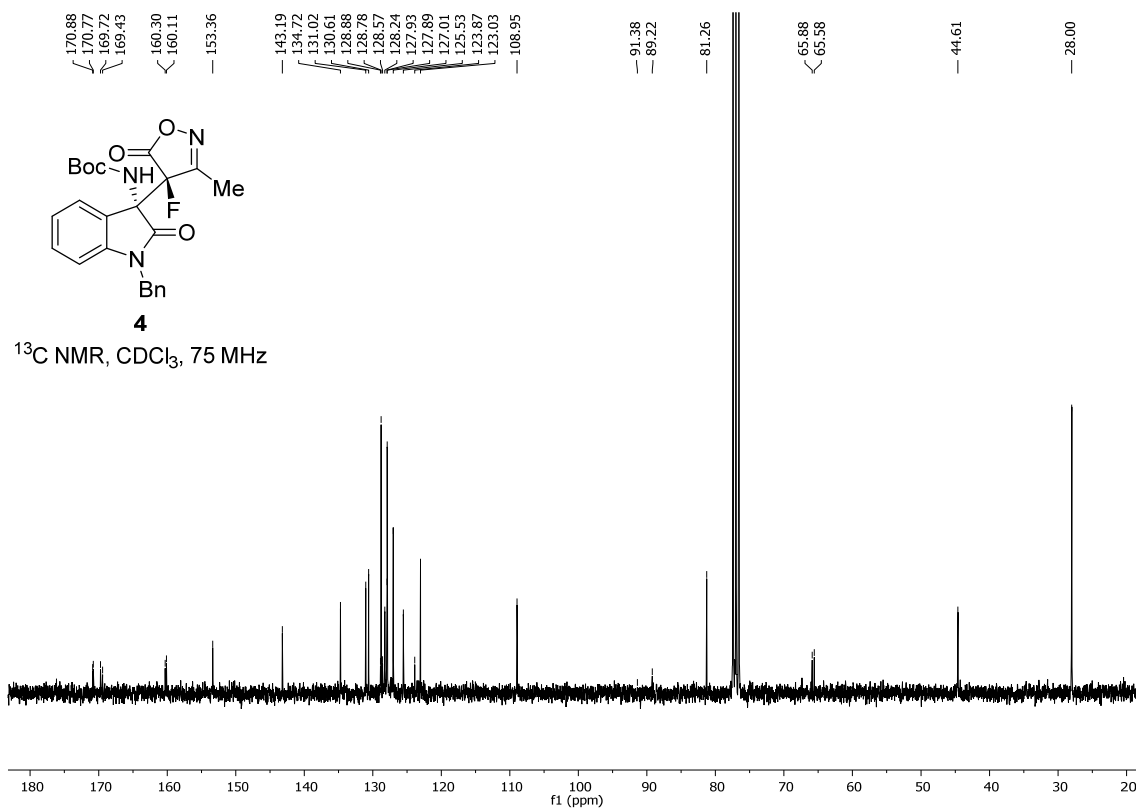



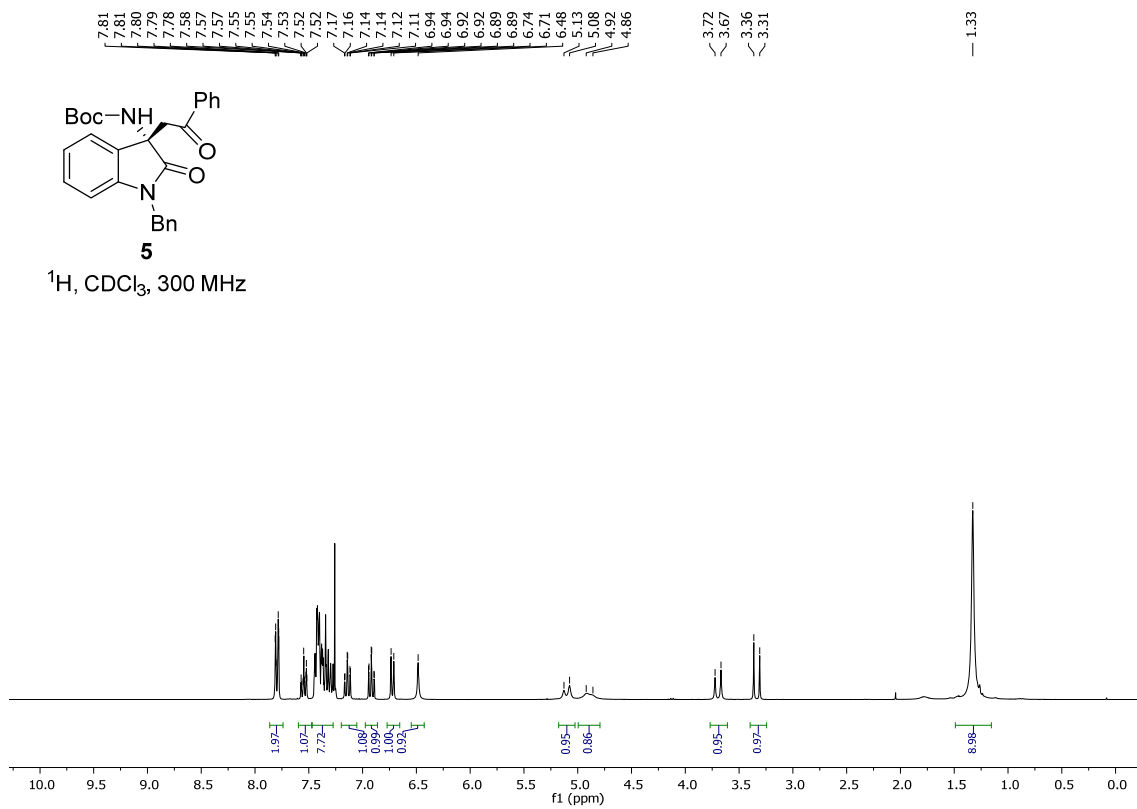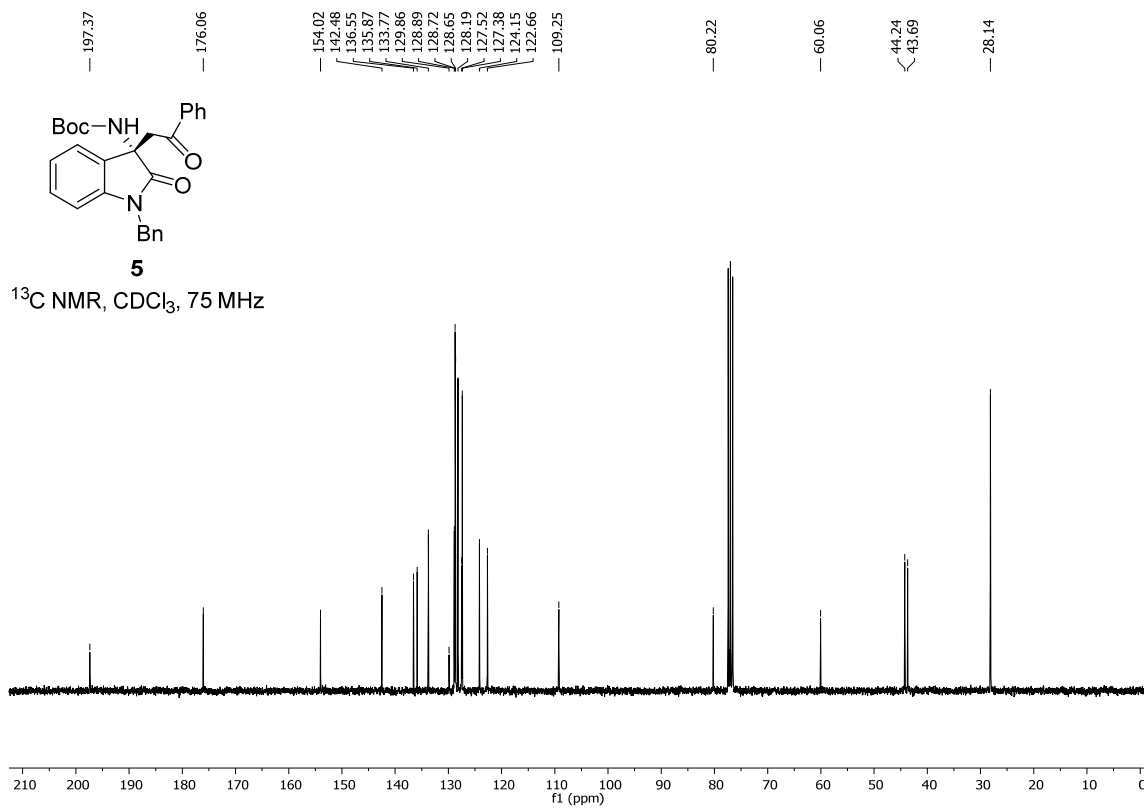

## HPLC traces for compounds 3-5

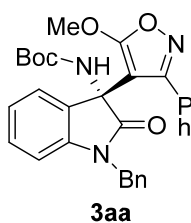

### Racemic

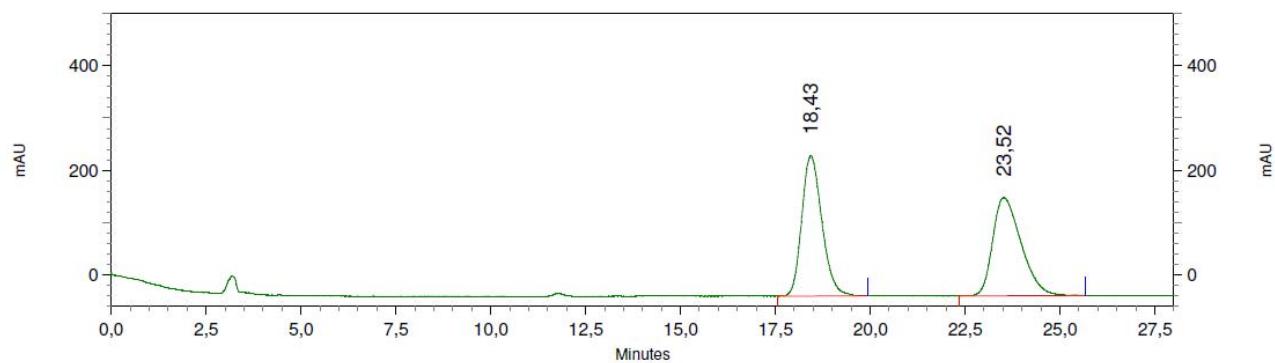

54: 212 nm, 4 nm

Results

| Retention Time | Area     | Area Percent |
|----------------|----------|--------------|
| 18,43          | 39632183 | 50,332       |
| 23,52          | 39108574 | 49,668       |

### Enantioenriched

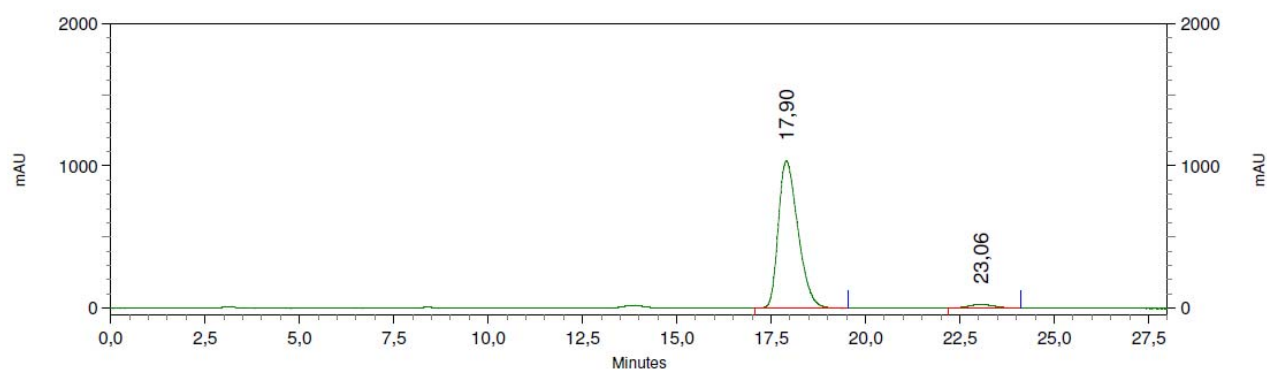

54: 212 nm, 4 nm

Results

| Retention Time | Area      | Area Percent |
|----------------|-----------|--------------|
| 17,90          | 150107162 | 96,552       |
| 23,06          | 5360105   | 3,448        |

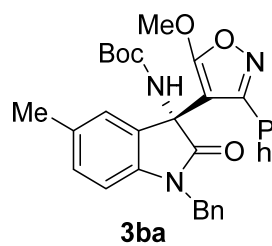

### Racemic

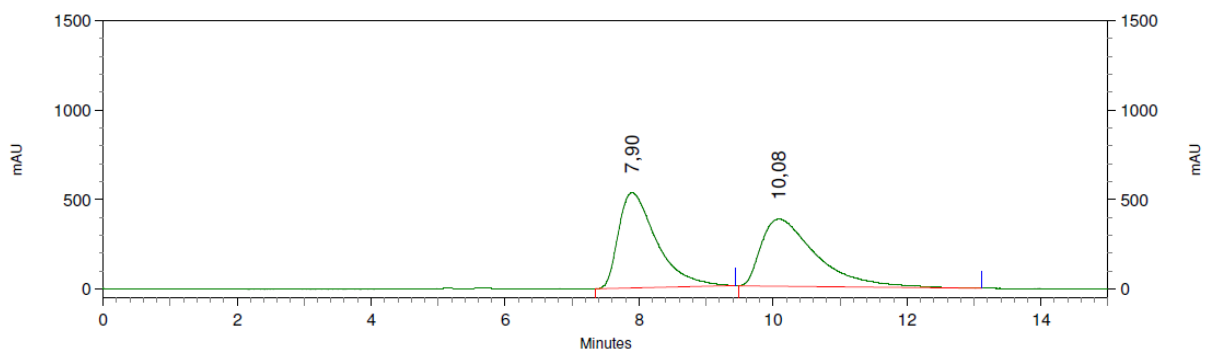

25: 266 nm, 4 nm

Results

| Retention Time | Area     | Area Percent |
|----------------|----------|--------------|
| 7,90           | 84259018 | 49,678       |
| 10,08          | 85350792 | 50,322       |

### Enantioenriched

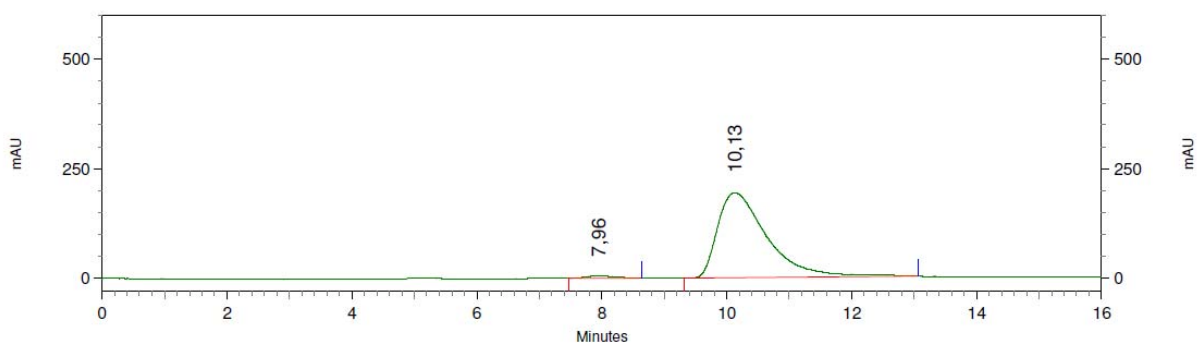

42: 256 nm, 4 nm

Results

| Retention Time | Area     | Area Percent |
|----------------|----------|--------------|
| 7,96           | 764558   | 1,753        |
| 10,13          | 42846882 | 98,247       |

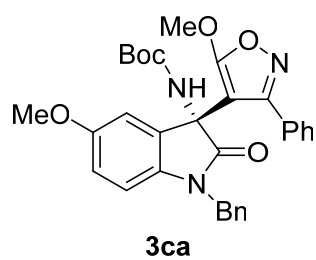

### Racemic

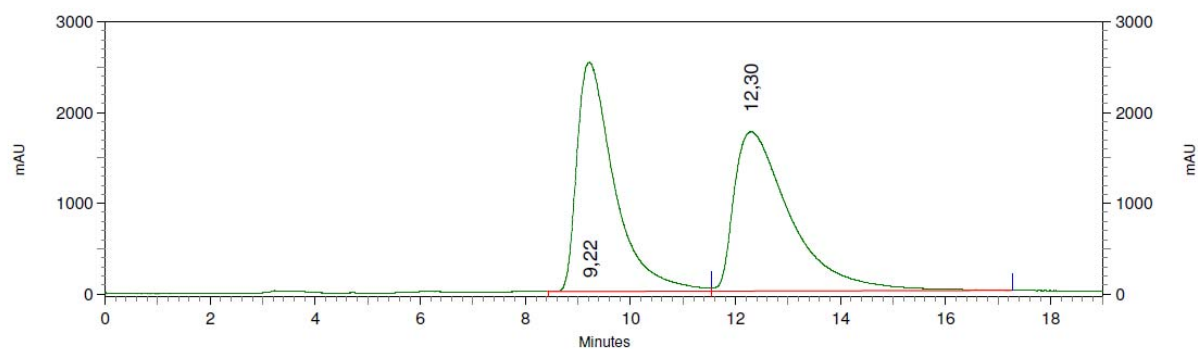

28: 205 nm, 4 nm  
Results

| Retention Time | Area      | Area Percent |
|----------------|-----------|--------------|
| 9,22           | 498769376 | 48,846       |
| 12,30          | 522339026 | 51,154       |

### Enantioenriched

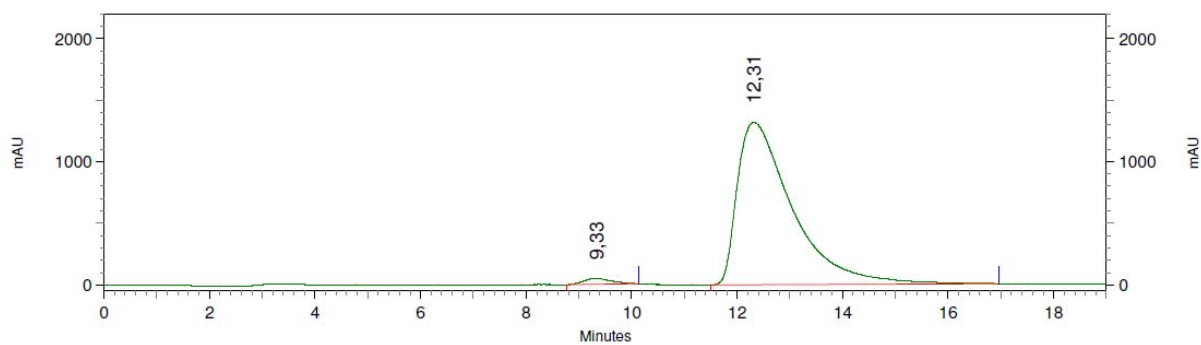

44: 209 nm, 4 nm  
Results

| Retention Time | Area      | Area Percent |
|----------------|-----------|--------------|
| 9,33           | 6939638   | 1,783        |
| 12,31          | 382216435 | 98,217       |

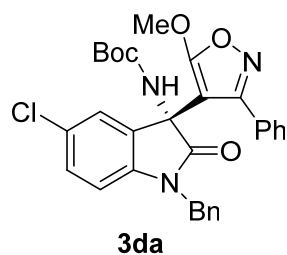

**Racemic**

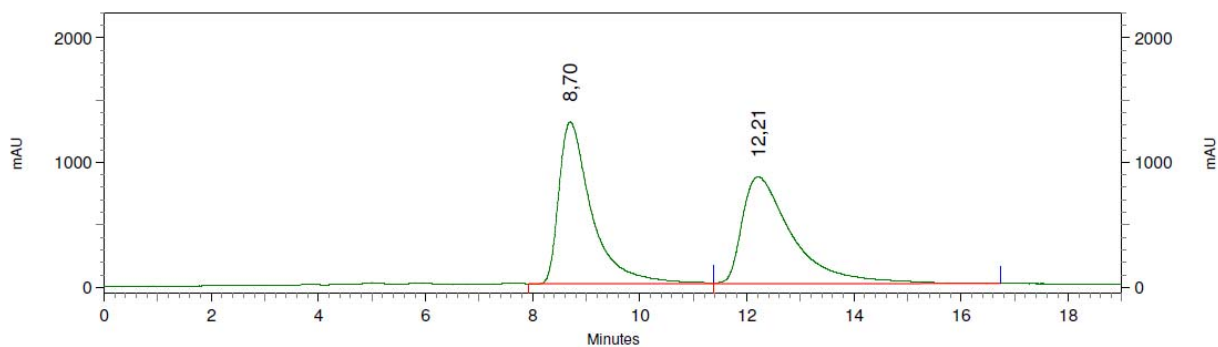

54: 211 nm, 4 nm

Results

| Retention Time | Area      | Area Percent |
|----------------|-----------|--------------|
| 8,70           | 220983773 | 49,730       |
| 12,21          | 223387724 | 50,270       |

**Enantioenriched**

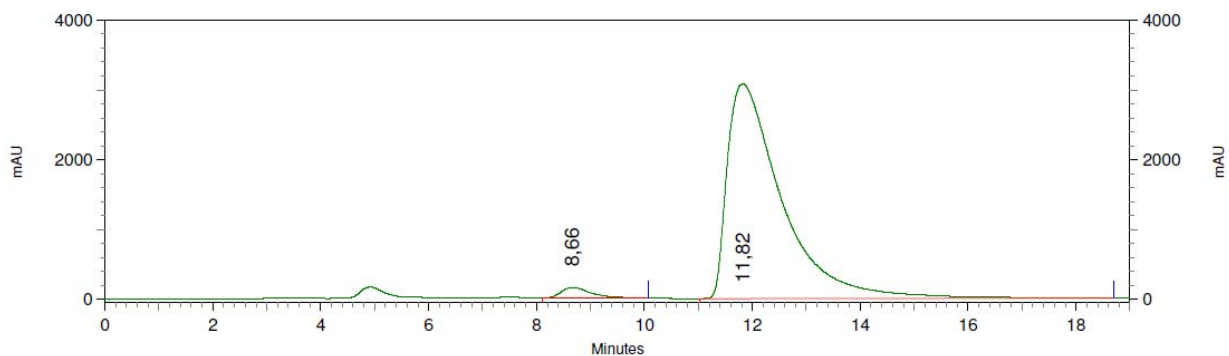

54: 211 nm, 4 nm

Results

| Retention Time | Area      | Area Percent |
|----------------|-----------|--------------|
| 8,66           | 23870589  | 2,673        |
| 11,82          | 868996614 | 97,327       |

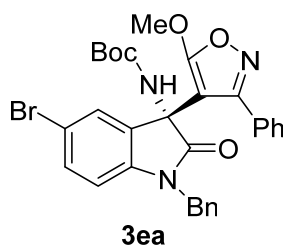

**Racemic**

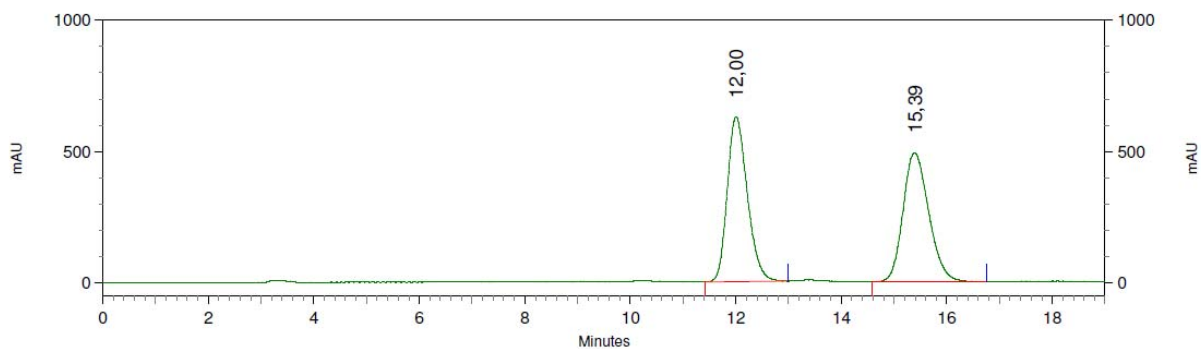

49: 217 nm, 4 nm  
Results

| Retention Time | Area     | Area Percent |
|----------------|----------|--------------|
| 12,00          | 66180482 | 49,901       |
| 15,39          | 66443009 | 50,099       |

**Enantioenriched**

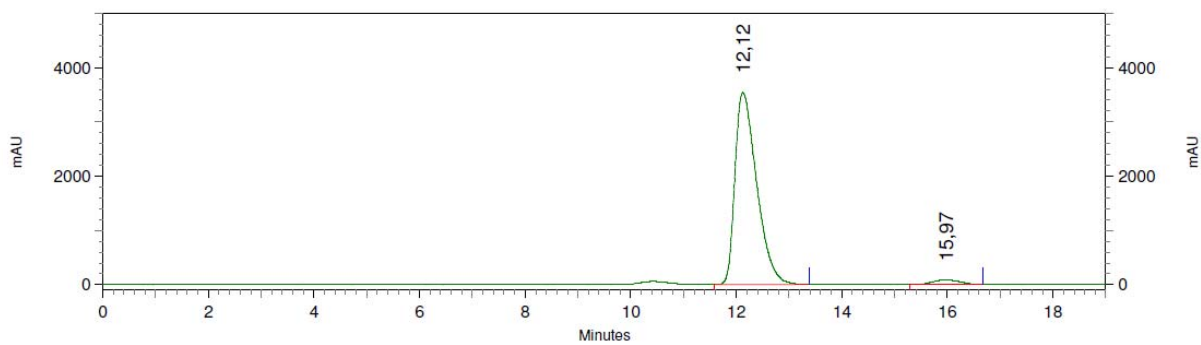

49: 217 nm, 4 nm  
Results

| Retention Time | Area      | Area Percent |
|----------------|-----------|--------------|
| 12,12          | 404757078 | 97,167       |
| 15,97          | 11800511  | 2,833        |

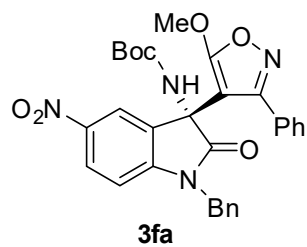

**Racemic**

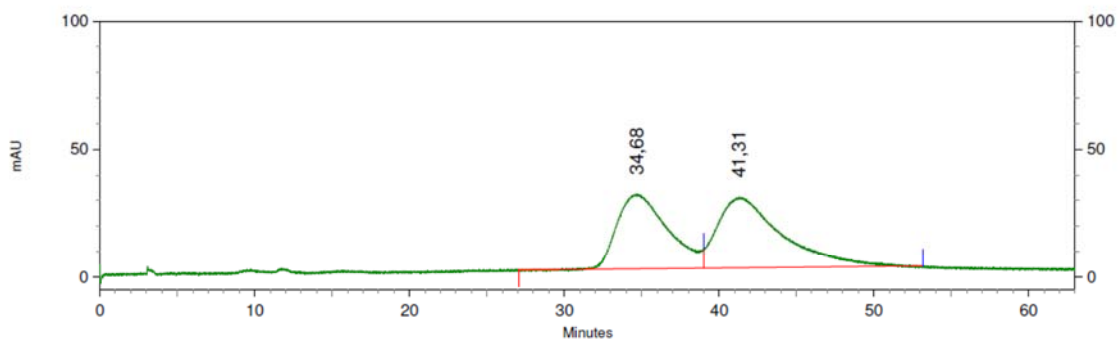

21: 279 nm, 4 nm  
Results

| Retention Time | Area     | Area Percent |
|----------------|----------|--------------|
| 34,68          | 26800448 | 45,585       |
| 41,31          | 31991659 | 54,415       |

**Enantioenriched**

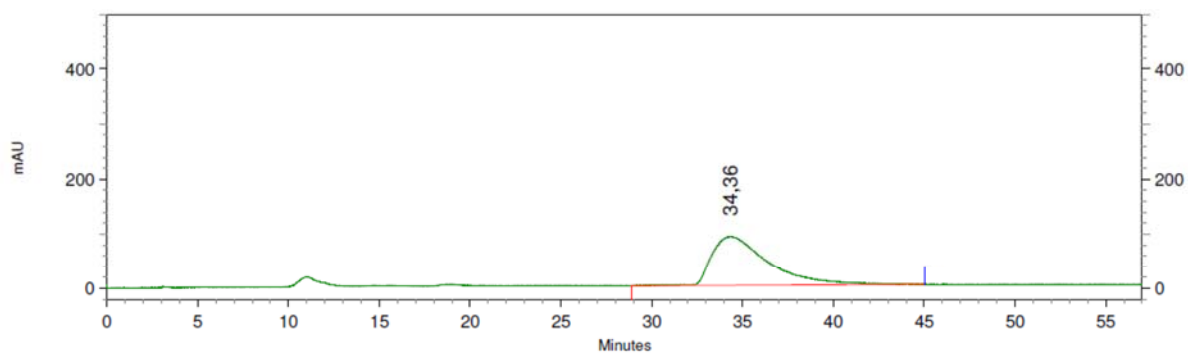

28: 279 nm, 4 nm  
Results

| Retention Time | Area     | Area Percent |
|----------------|----------|--------------|
| 34,36          | 78932085 | 100,000      |

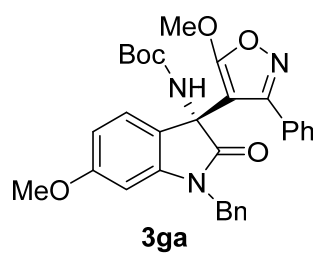

### Racemic

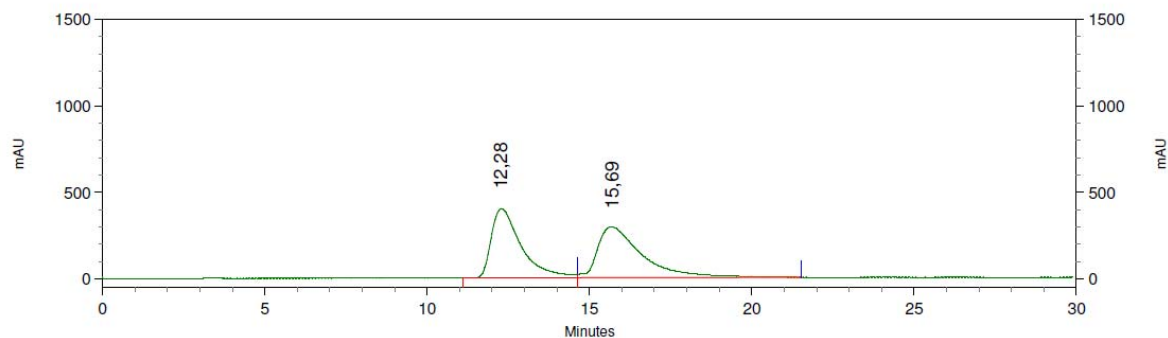

14: 247 nm, 4 nm

Results

| Retention Time | Area      | Area Percent |
|----------------|-----------|--------------|
| 12,28          | 101416892 | 47,912       |
| 15,69          | 110258468 | 52,088       |

### Enantioenriched

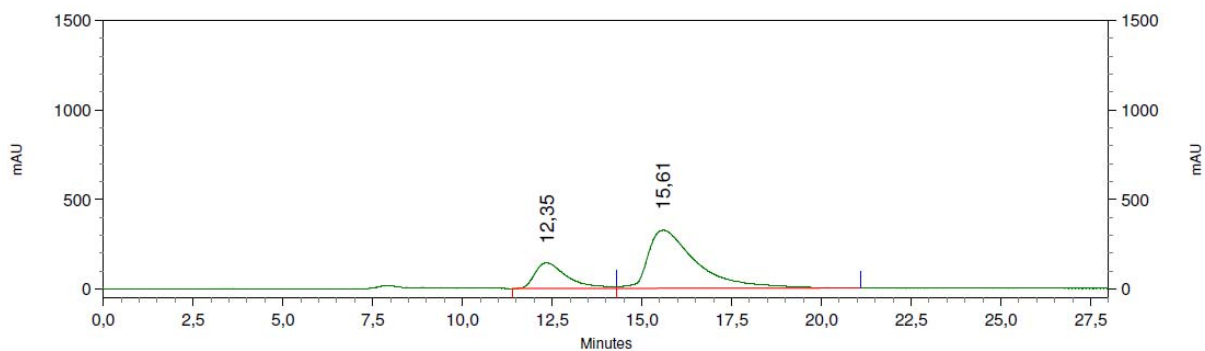

14: 247 nm, 4 nm

Results

| Retention Time | Area      | Area Percent |
|----------------|-----------|--------------|
| 12,35          | 35710775  | 22,791       |
| 15,61          | 120977072 | 77,209       |



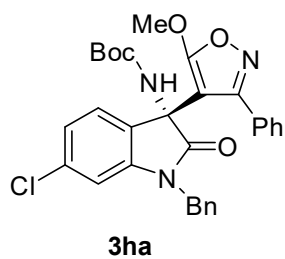

**Racemic**

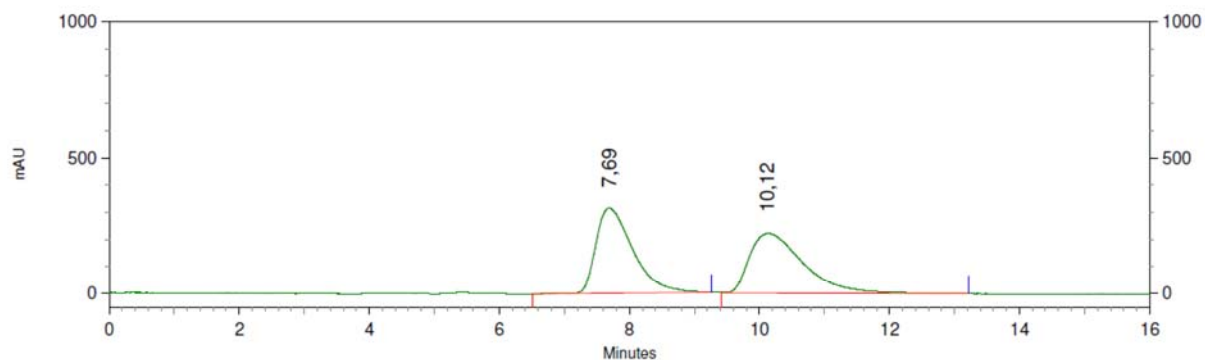

20: 237 nm, 4 nm  
Results

| Retention Time | Area     | Area Percent |
|----------------|----------|--------------|
| 7,69           | 49928294 | 49,538       |
| 10,12          | 50858890 | 50,462       |

**Enantioenriched**

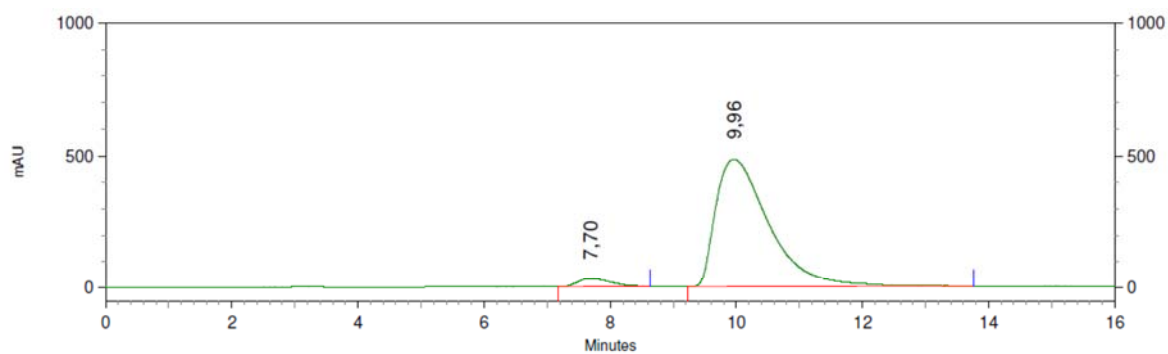

20: 237 nm, 4 nm  
Results

| Retention Time | Area      | Area Percent |
|----------------|-----------|--------------|
| 7,70           | 4480681   | 3,784        |
| 9,96           | 113944625 | 96,216       |

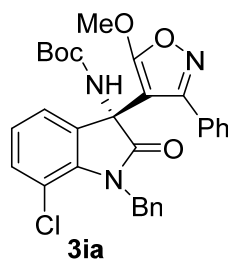

### Racemic

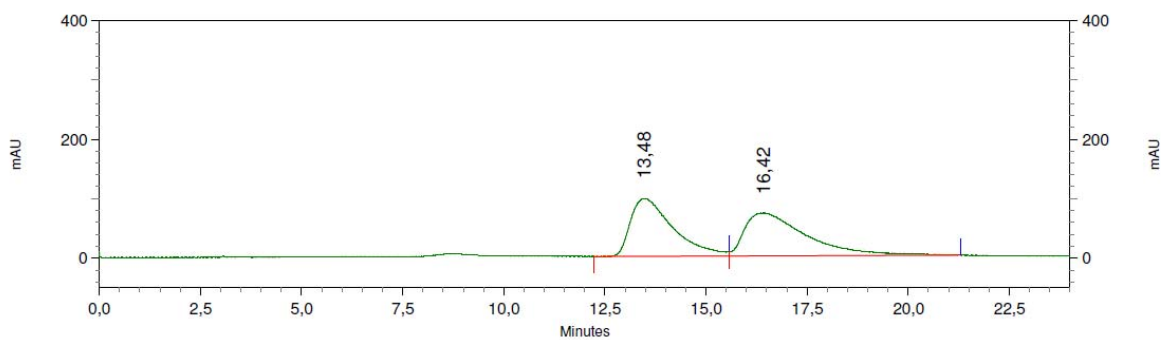

28: 279 nm, 4 nm  
Results

| Retention Time | Area     | Area Percent |
|----------------|----------|--------------|
| 13,48          | 28500135 | 48,196       |
| 16,42          | 30633391 | 51,804       |

### Enantioenriched

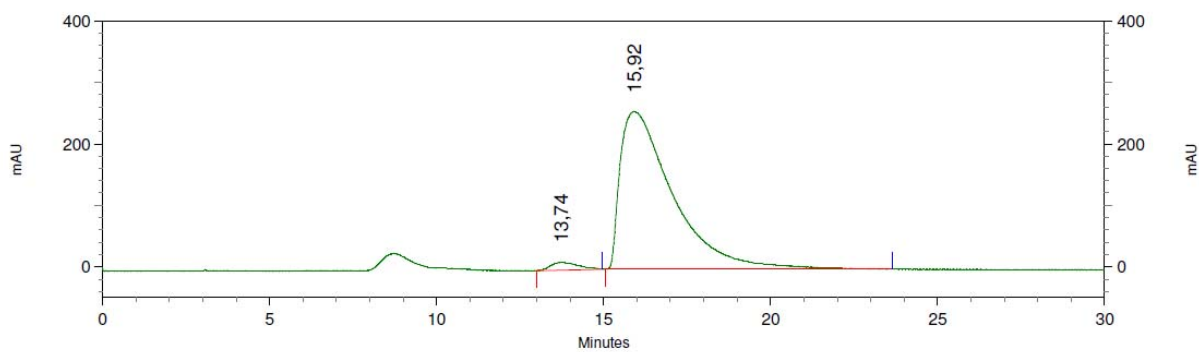

28: 279 nm, 4 nm  
Results

| Retention Time | Area      | Area Percent |
|----------------|-----------|--------------|
| 13,74          | 2953943   | 2,539        |
| 15,92          | 113386040 | 97,461       |

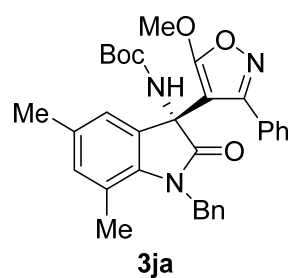

### Racemic

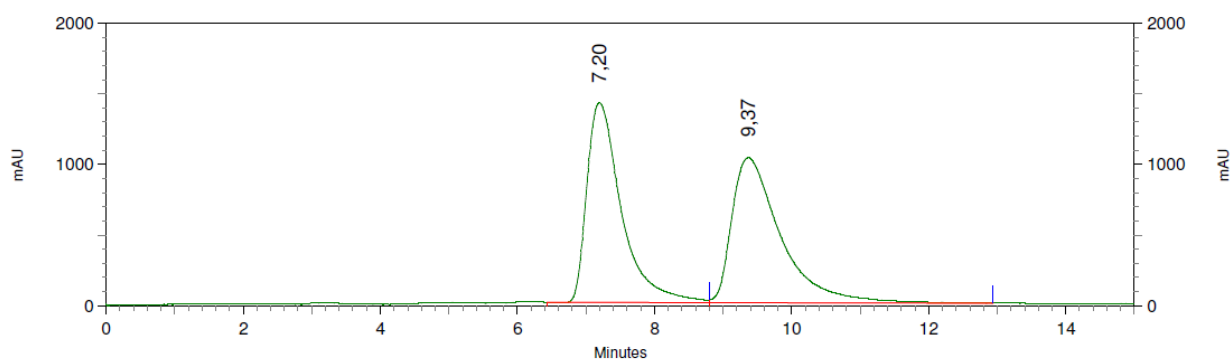

56: 212 nm, 4 nm  
Results

| Retention Time | Area      | Area Percent |
|----------------|-----------|--------------|
| 7,20           | 198311944 | 49,356       |
| 9,37           | 203484970 | 50,644       |

### Enantioenriched

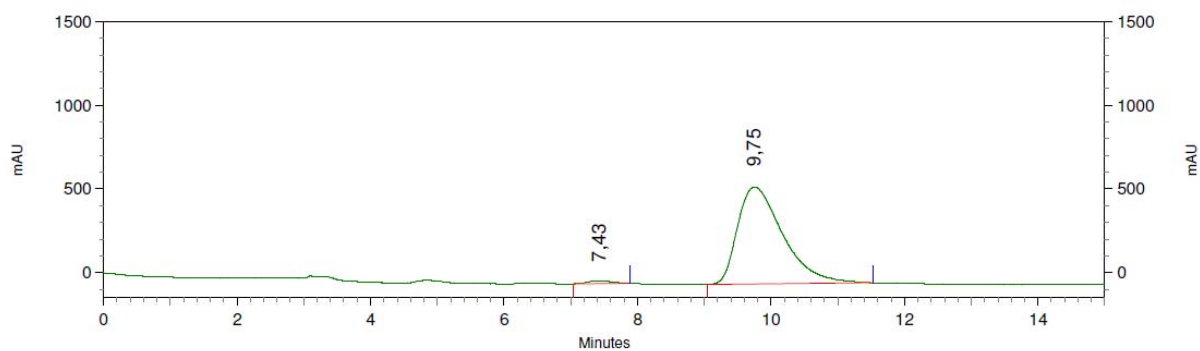

37: 222 nm, 4 nm  
Results

| Retention Time | Area      | Area Percent |
|----------------|-----------|--------------|
| 7,43           | 1617495   | 1,465        |
| 9,75           | 108816823 | 98,535       |

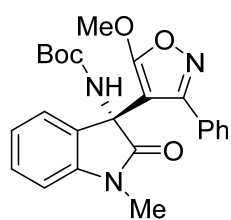

**3ka**

**Racemic**

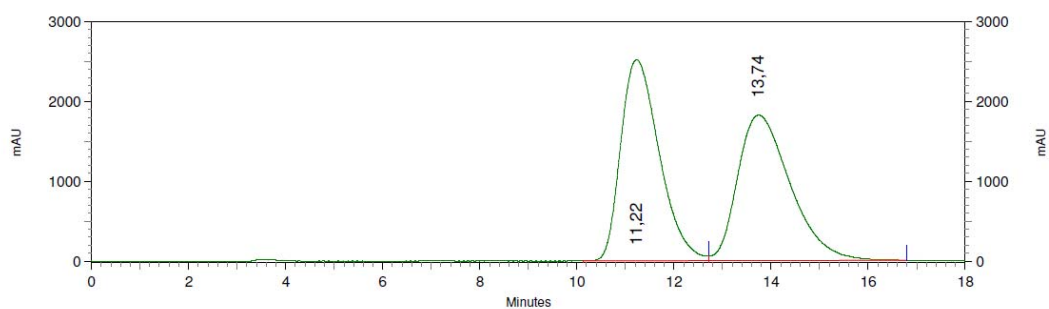

23: 220 nm, 4 nm  
Results

| Retention Time | Area      | Area Percent |
|----------------|-----------|--------------|
| 11,22          | 555679283 | 50,354       |
| 13,74          | 547856376 | 49,646       |

**Enantioenriched**

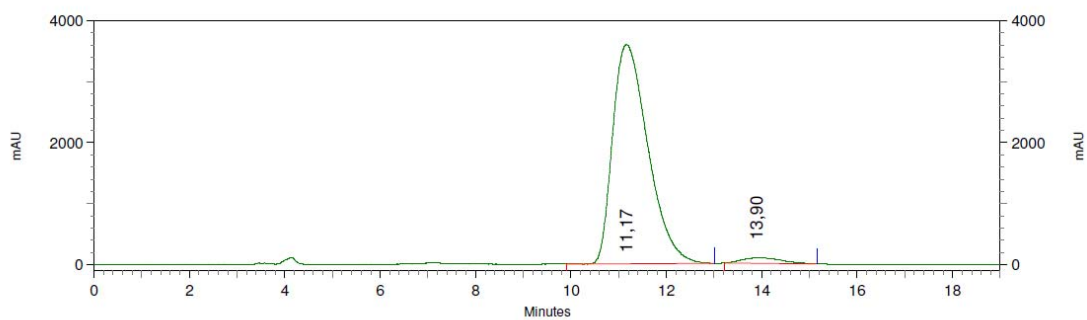

23: 220 nm, 4 nm  
Results

| Retention Time | Area      | Area Percent |
|----------------|-----------|--------------|
| 11,17          | 737131966 | 97,232       |
| 13,90          | 20982460  | 2,768        |

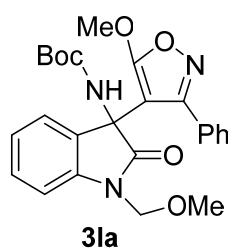

**Racemic**

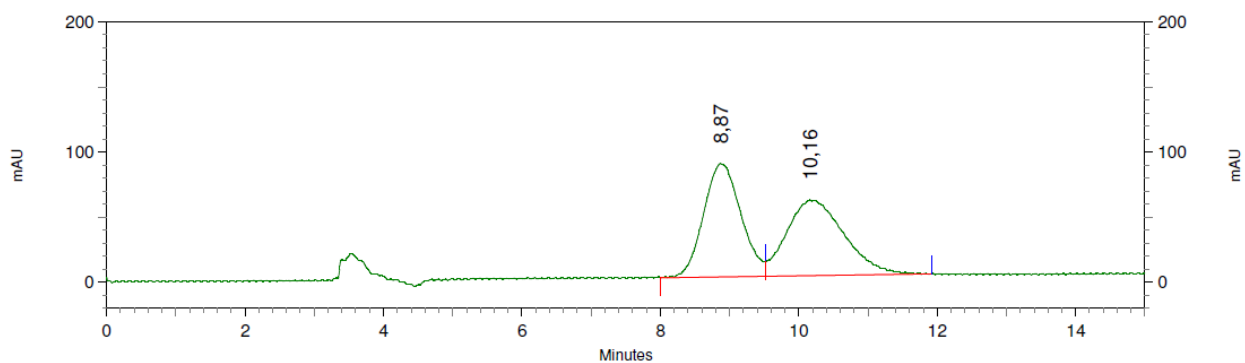

12: 217 nm, 4 nm

Results

| Retention Time | Area     | Area Percent |
|----------------|----------|--------------|
| 8,87           | 13049126 | 49,525       |
| 10,16          | 13299416 | 50,475       |

**Enantioenriched**

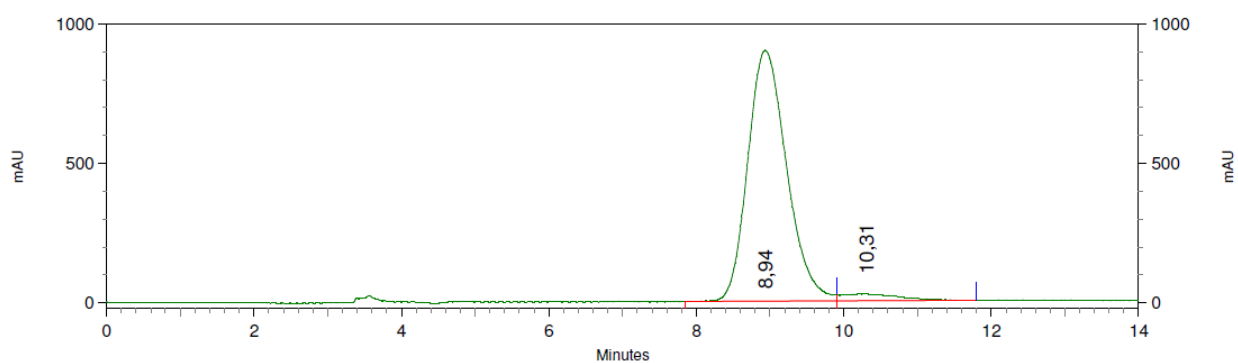

12: 217 nm, 4 nm

Results

| Retention Time | Area      | Area Percent |
|----------------|-----------|--------------|
| 8,94           | 131923917 | 96,118       |
| 10,31          | 5327665   | 3,882        |

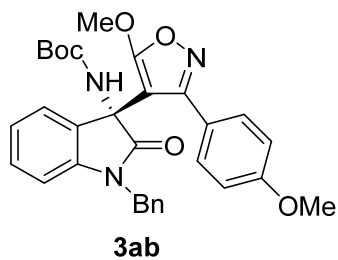

**Racemic**

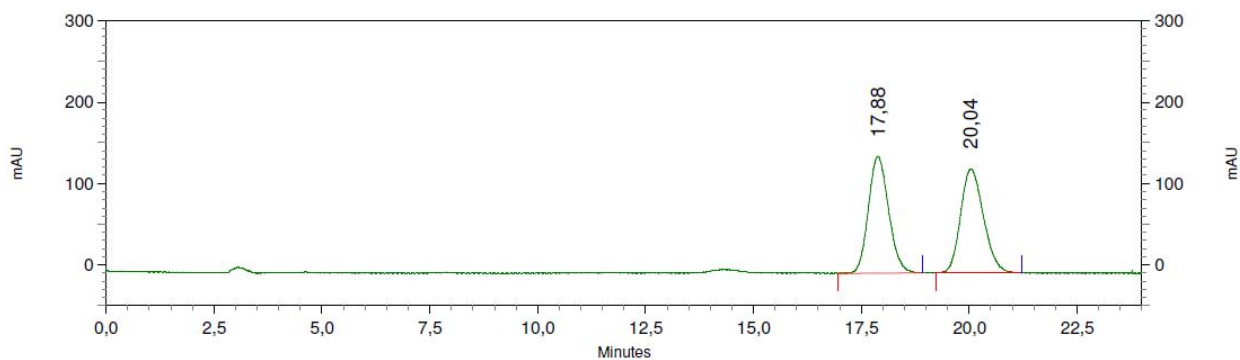

43: 226 nm, 4 nm

Results

| Retention Time | Area     | Area Percent |
|----------------|----------|--------------|
| 17,88          | 18770722 | 49,727       |
| 20,04          | 18976536 | 50,273       |

**Enantioenriched**

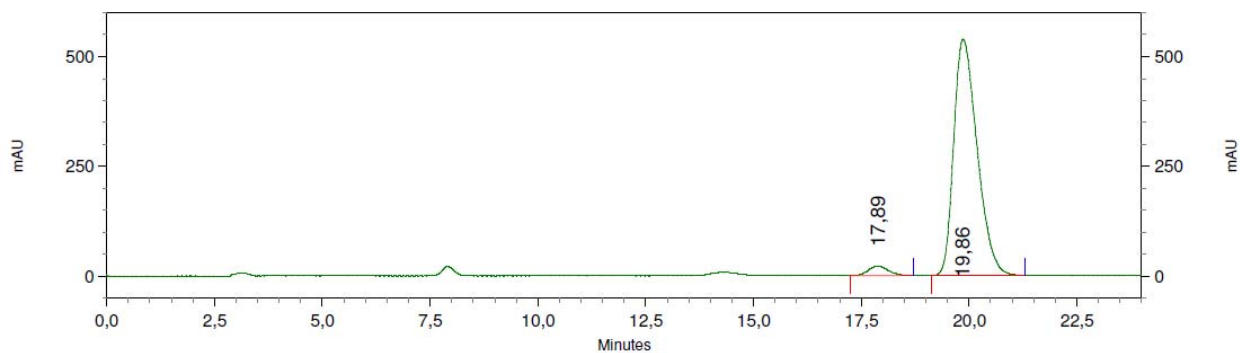

43: 226 nm, 4 nm

Results

| Retention Time | Area     | Area Percent |
|----------------|----------|--------------|
| 17,89          | 2858070  | 3,396        |
| 19,86          | 81303137 | 96,604       |

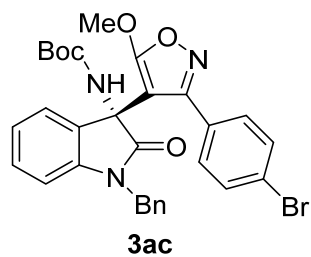

### Racemic

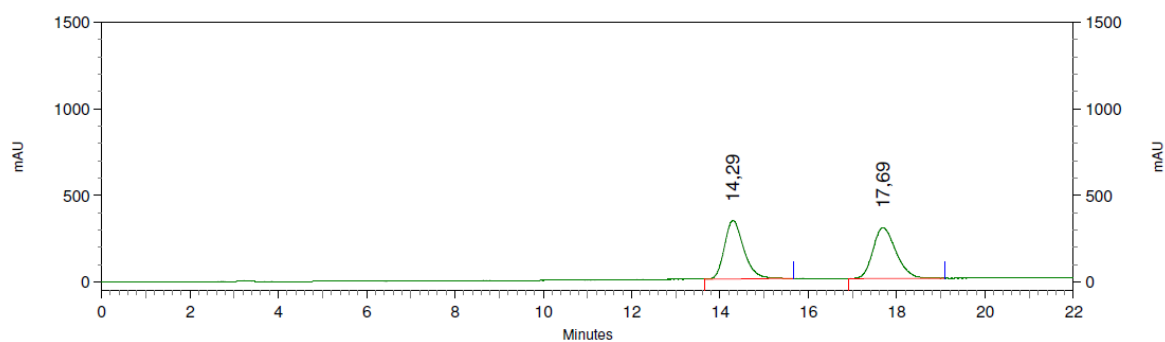

63: 227 nm, 4 nm  
Results

| Retention Time | Area     | Area Percent |
|----------------|----------|--------------|
| 14,29          | 41268832 | 49,221       |
| 17,69          | 42575831 | 50,779       |

### Enantioenriched

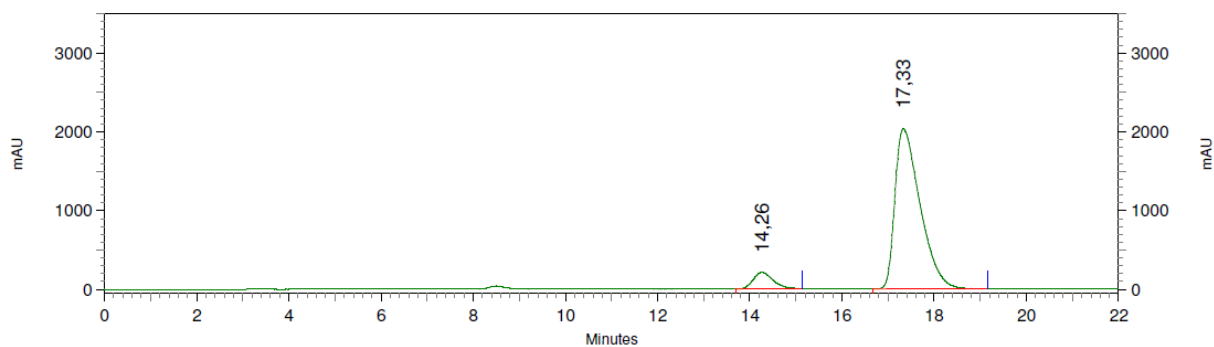

63: 227 nm, 4 nm  
Results

| Retention Time | Area      | Area Percent |
|----------------|-----------|--------------|
| 14,26          | 24968261  | 7,506        |
| 17,33          | 307690687 | 92,494       |

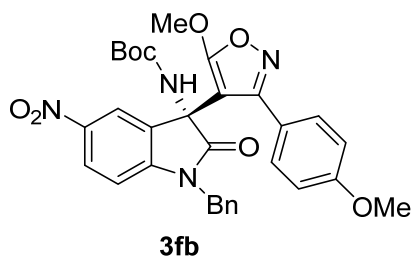

### Racemic

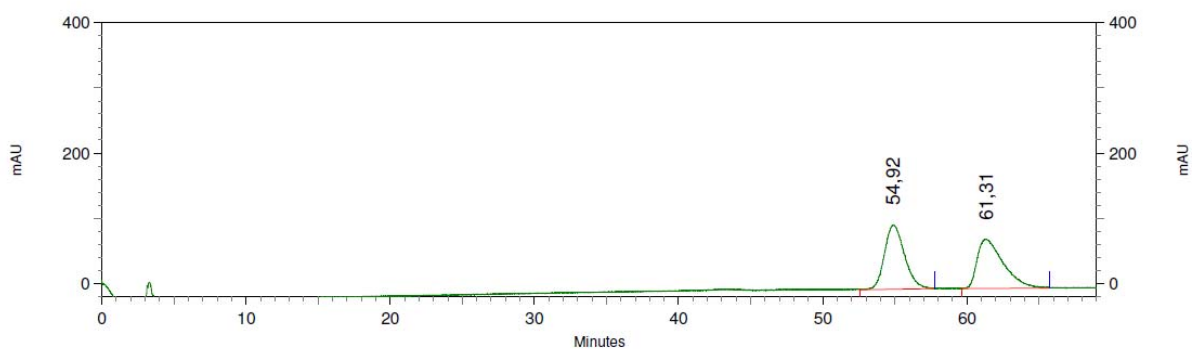

9: 210 nm, 4 nm Results

| Retention Time | Area     | Area Percent |
|----------------|----------|--------------|
| 54,92          | 37902529 | 49,943       |
| 61,31          | 37988309 | 50,057       |

### Enantioenriched

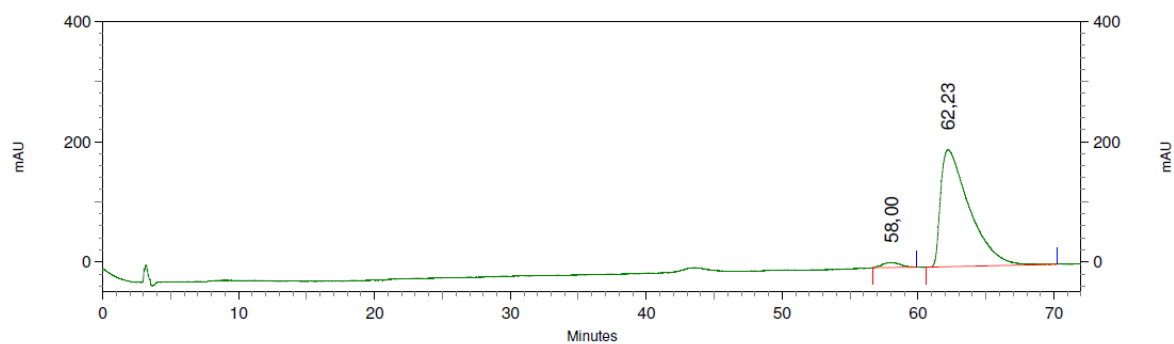

9: 210 nm, 4 nm Results

| Retention Time | Area      | Area Percent |
|----------------|-----------|--------------|
| 58,00          | 3156335   | 2,685        |
| 62,23          | 114389246 | 97,315       |



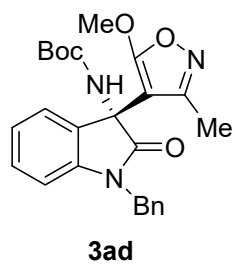

**Racemic**

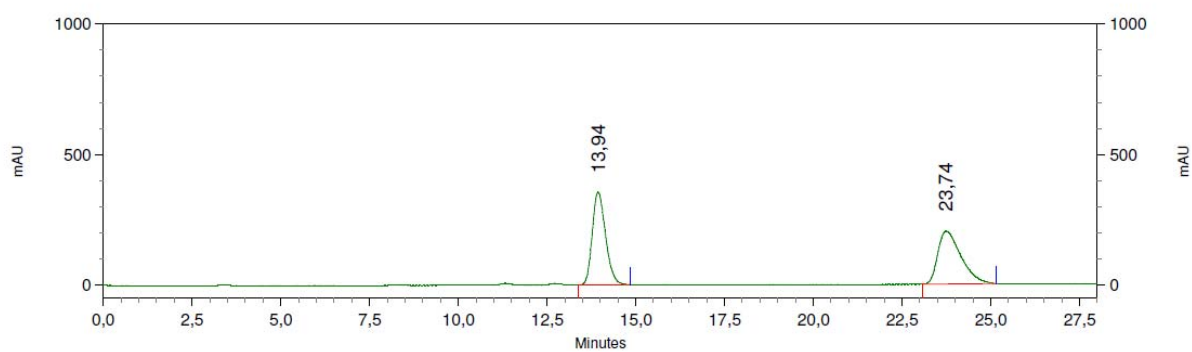

15: 234 nm, 4 nm  
Results

| Retention Time | Area     | Area Percent |
|----------------|----------|--------------|
| 13,94          | 36884217 | 50,205       |
| 23,74          | 36582424 | 49,795       |

**Enantioenriched**

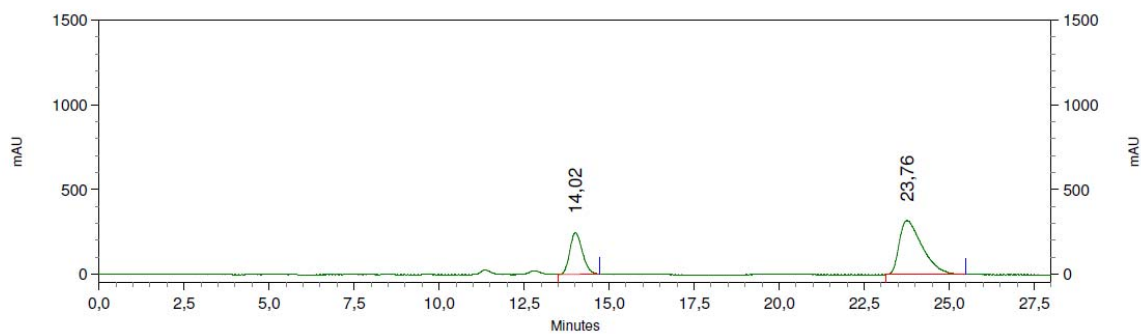

15: 234 nm, 4 nm  
Results

| Retention Time | Area     | Area Percent |
|----------------|----------|--------------|
| 14,02          | 25081267 | 29,539       |
| 23,76          | 59826363 | 70,461       |

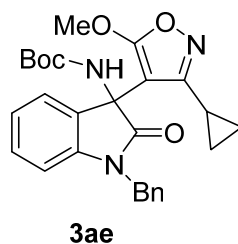

### Racemic

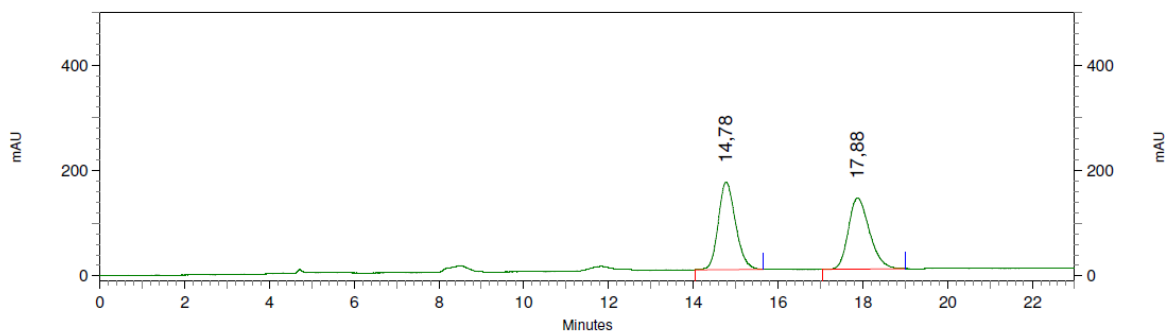

38: 258 nm, 4 nm

Results

| Retention Time | Area     | Area Percent |
|----------------|----------|--------------|
| 14,78          | 18769040 | 50,085       |
| 17,88          | 18705367 | 49,915       |

### Enantioenriched

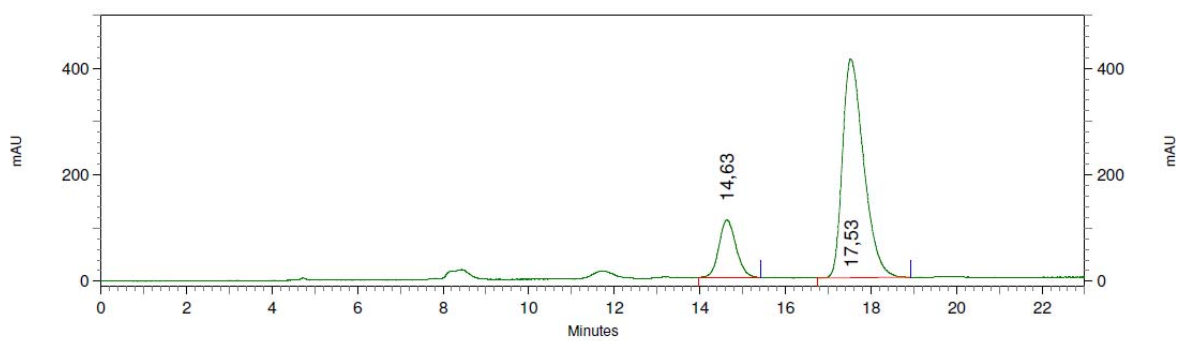

38: 258 nm, 4 nm

Results

| Retention Time | Area     | Area Percent |
|----------------|----------|--------------|
| 14,63          | 12040376 | 17,493       |
| 17,53          | 56787999 | 82,507       |

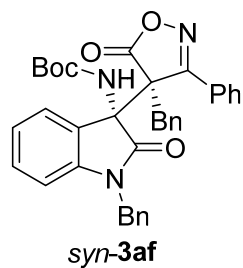

### Racemic

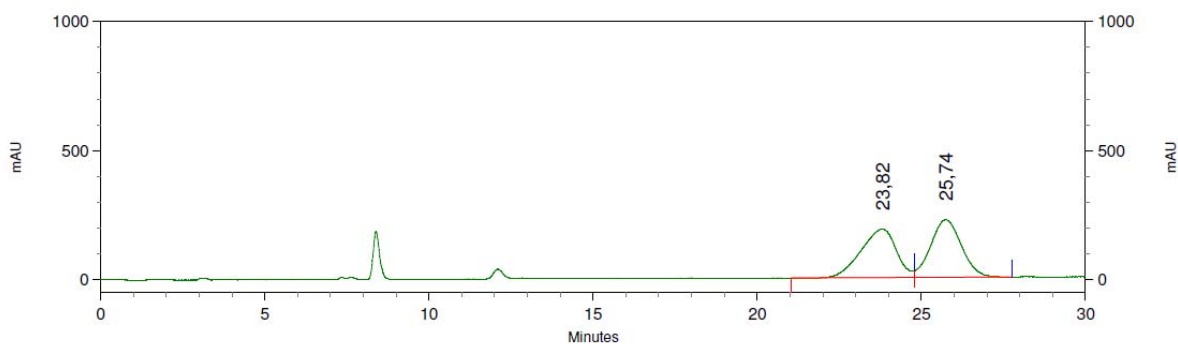

68: 219 nm, 4 nm  
Results

| Retention Time | Area     | Area Percent |
|----------------|----------|--------------|
| 23,82          | 56166252 | 49,347       |
| 25,74          | 57653452 | 50,653       |

### Enantioenriched

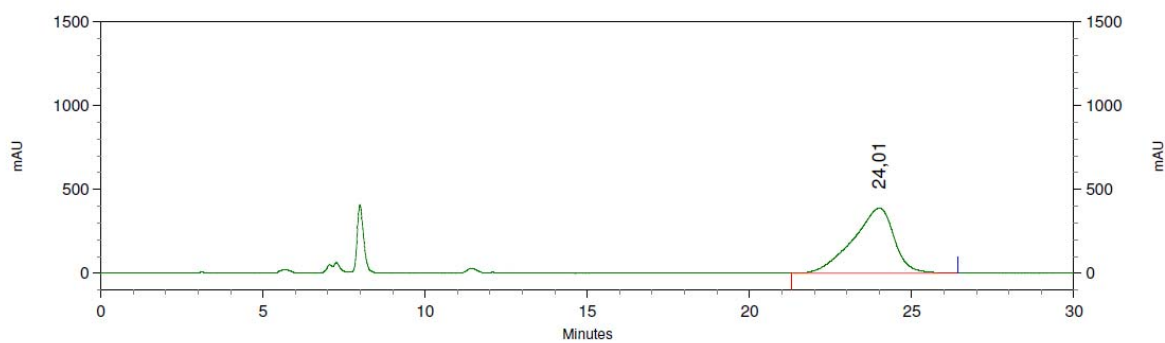

68: 219 nm, 4 nm  
Results

| Retention Time | Area      | Area Percent |
|----------------|-----------|--------------|
| 24,01          | 136870293 | 100,000      |

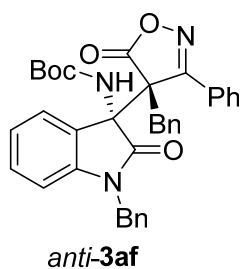

### Racemic

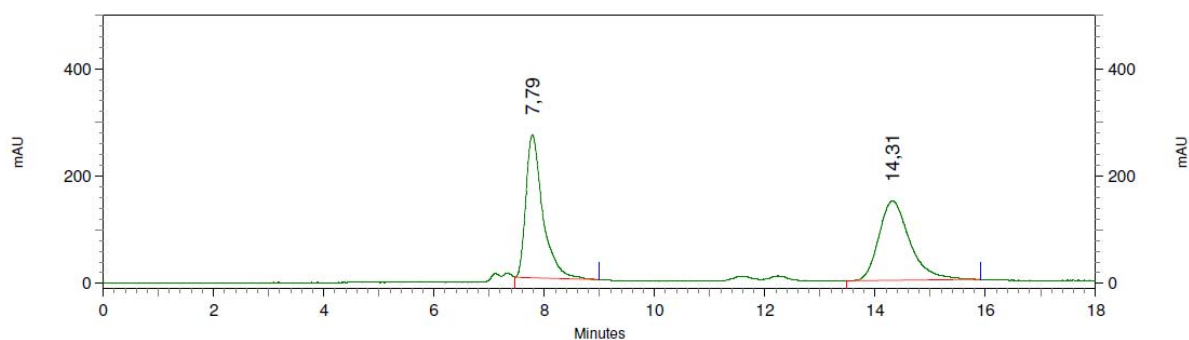

38: 258 nm, 4 nm

Results

| Retention Time | Area     | Area Percent |
|----------------|----------|--------------|
| 7,79           | 22667667 | 49,426       |
| 14,31          | 23194392 | 50,574       |

### Enantioenriched

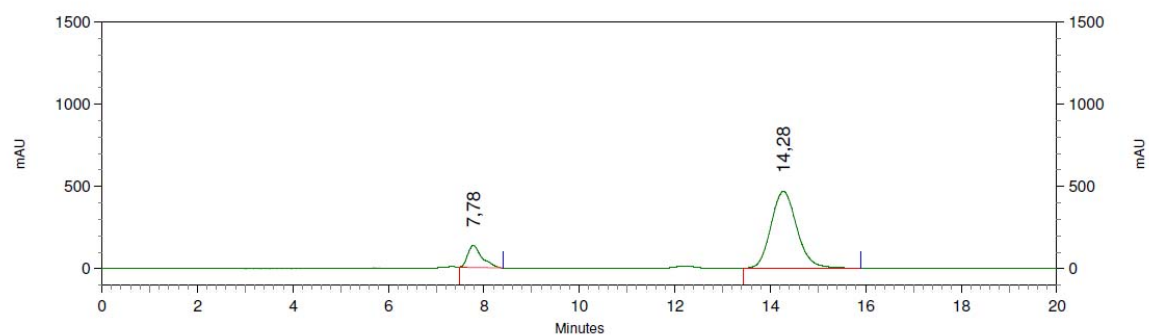

38: 258 nm, 4 nm

Results

| Retention Time | Area     | Area Percent |
|----------------|----------|--------------|
| 7,78           | 11161166 | 13,860       |
| 14,28          | 69365927 | 86,140       |

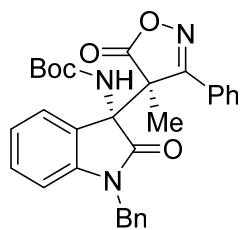

**syn-3ag**

**Racemic**

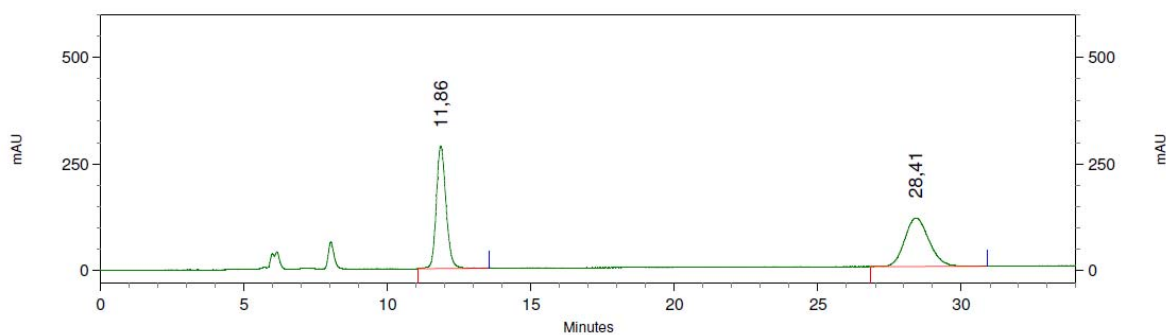

42: 256 nm, 4 nm  
Results

| Retention Time | Area     | Area Percent |
|----------------|----------|--------------|
| 11,86          | 27023477 | 50,165       |
| 28,41          | 26845558 | 49,835       |

**Enantioenriched**

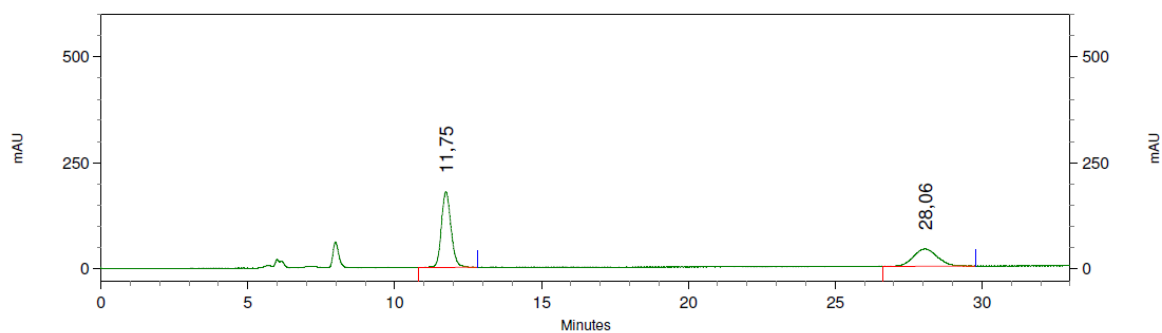

42: 256 nm, 4 nm  
Results

| Retention Time | Area     | Area Percent |
|----------------|----------|--------------|
| 11,75          | 16348660 | 63,440       |
| 28,06          | 9421506  | 36,560       |

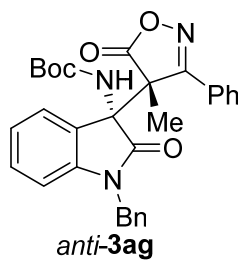

### Racemic

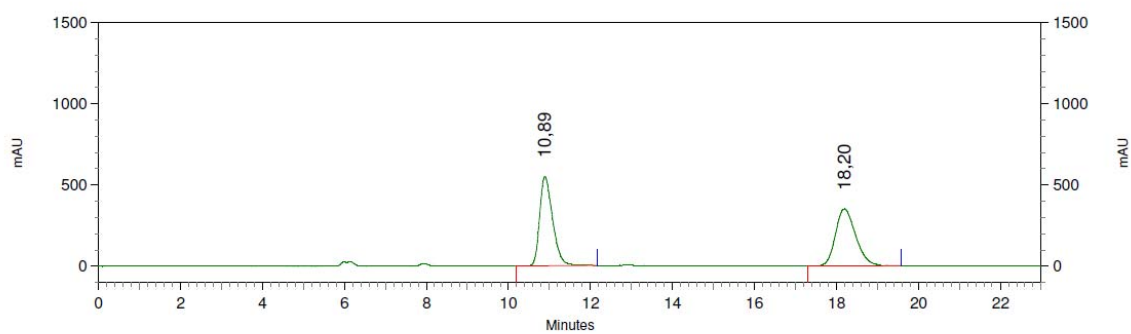

42: 256 nm, 4 nm

Results

| Retention Time | Area     | Area Percent |
|----------------|----------|--------------|
| 10,89          | 48504299 | 50,343       |
| 18,20          | 47844022 | 49,657       |

### Enantioenriched

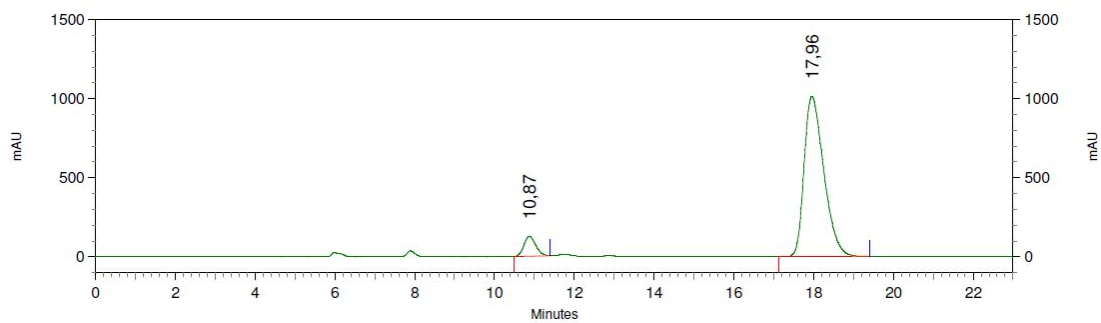

42: 256 nm, 4 nm

Results

| Retention Time | Area      | Area Percent |
|----------------|-----------|--------------|
| 10,87          | 10293009  | 6,906        |
| 17,96          | 138760363 | 93,094       |

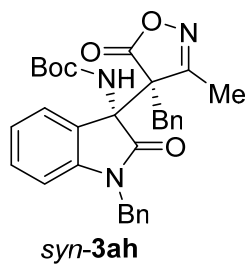

### Racemic

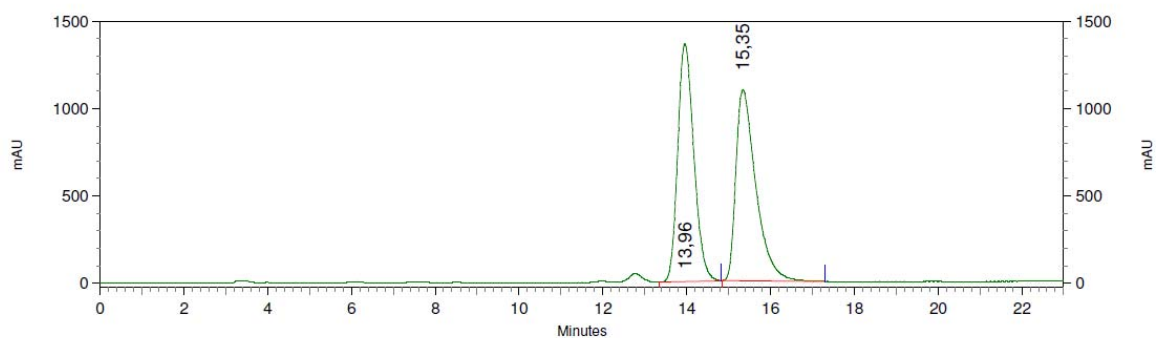

54: 211 nm, 4 nm  
Results

| Retention Time | Area      | Area Percent |
|----------------|-----------|--------------|
| 13,96          | 146059544 | 50,106       |
| 15,35          | 145444332 | 49,894       |

### Enantioenriched

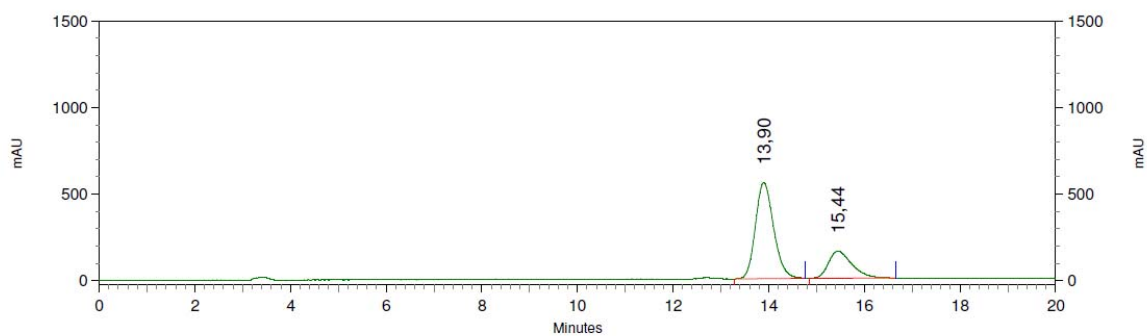

54: 211 nm, 4 nm  
Results

| Retention Time | Area     | Area Percent |
|----------------|----------|--------------|
| 13,90          | 58738242 | 73,082       |
| 15,44          | 21634557 | 26,918       |

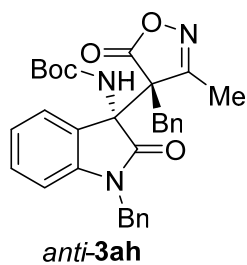

**Racemic**

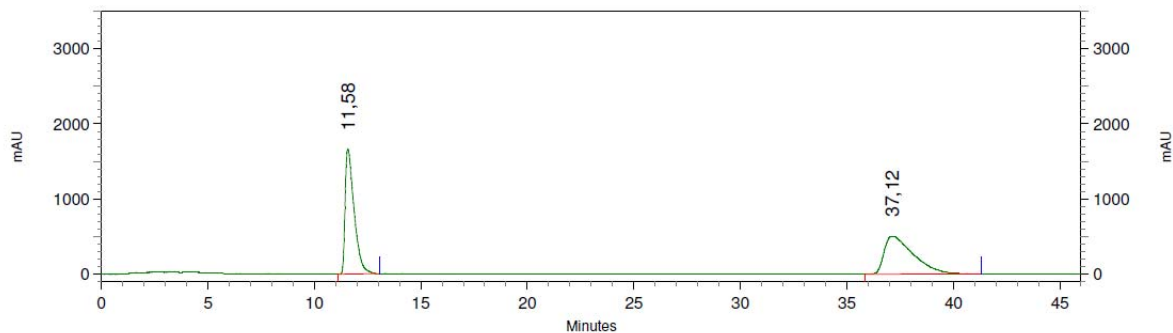

54: 211 nm, 4 nm  
Results

| Retention Time | Area      | Area Percent |
|----------------|-----------|--------------|
| 11,58          | 194501285 | 49,977       |
| 37,12          | 194676937 | 50,023       |

**Enantioenriched**

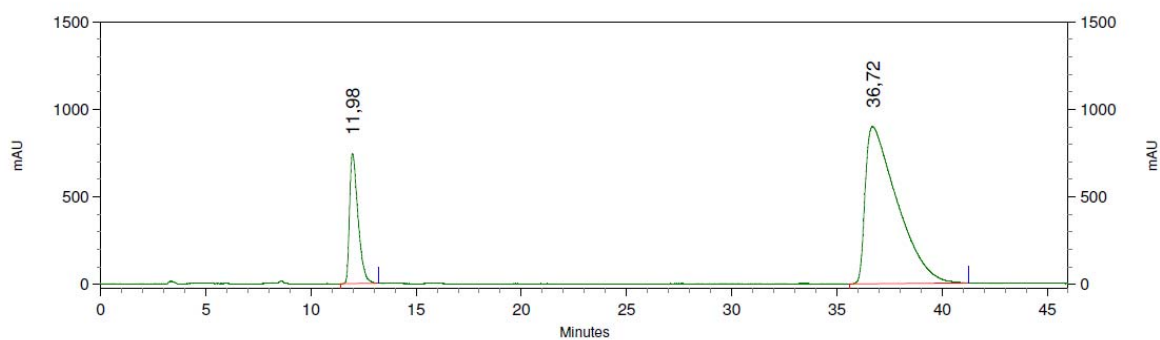

54: 211 nm, 4 nm  
Results

| Retention Time | Area      | Area Percent |
|----------------|-----------|--------------|
| 11,98          | 83197926  | 18,054       |
| 36,72          | 377634261 | 81,946       |



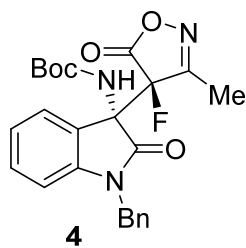

**Racemic**

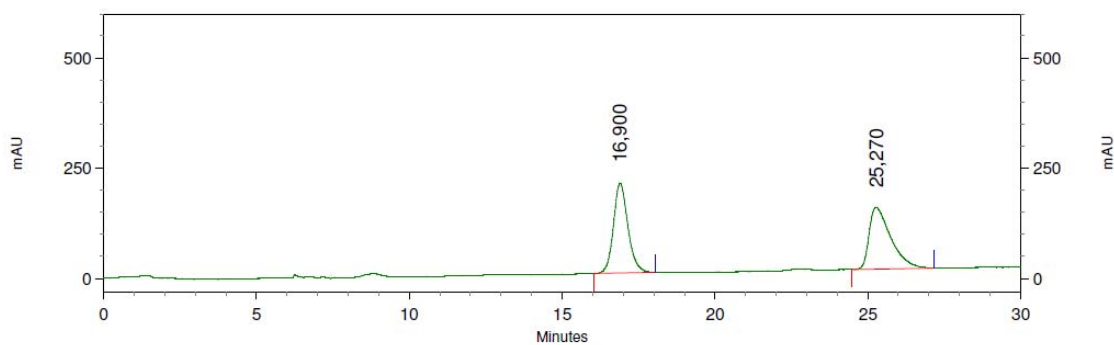

1: 268 nm, 4 nm Results

| Retention Time | Area     | Area Percent |
|----------------|----------|--------------|
| 16,900         | 26755918 | 49,330       |
| 25,270         | 27483222 | 50,670       |

**Enantioenriched**

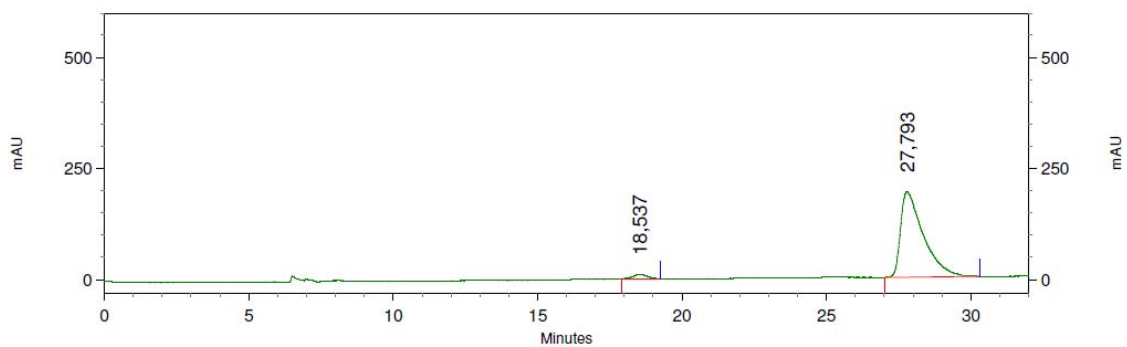

1: 268 nm, 4 nm Results

| Retention Time | Area     | Area Percent |
|----------------|----------|--------------|
| 18,537         | 1394891  | 3,213        |
| 27,793         | 42018313 | 96,787       |

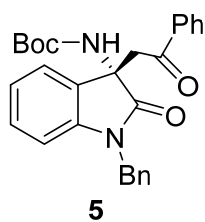

### Racemic

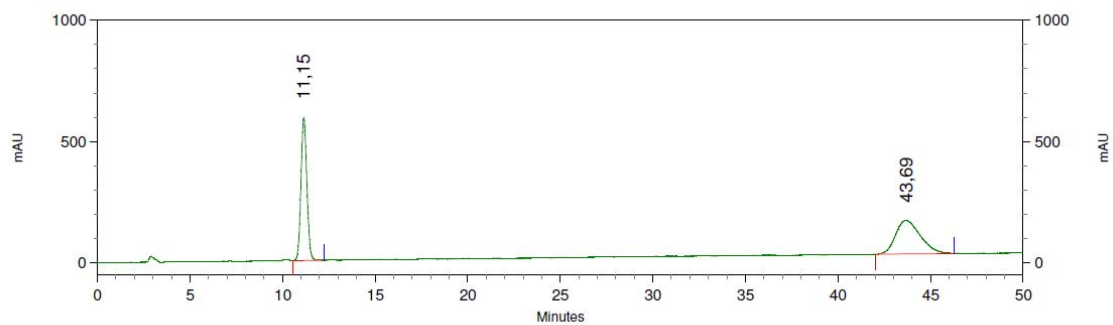

65: 210 nm, 4 nm

Results

| Retention Time | Area     | Area Percent |
|----------------|----------|--------------|
| 11,15          | 52101686 | 50,386       |
| 43,69          | 51302539 | 49,614       |

### Enantioenriched

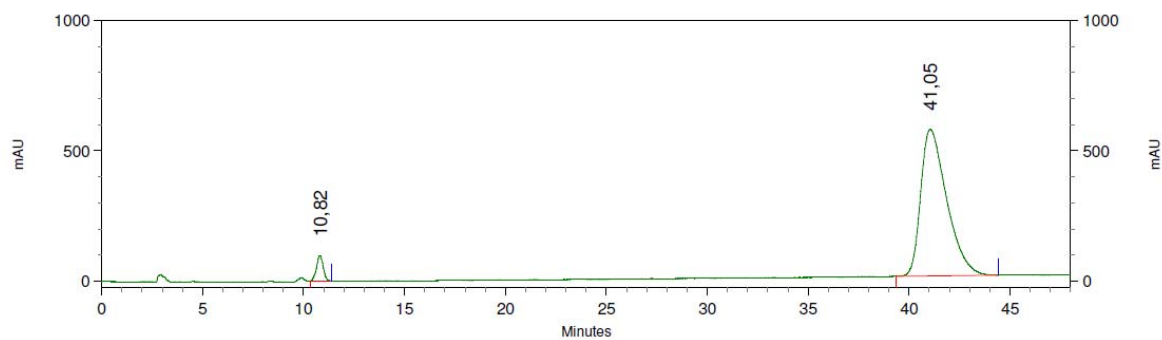

65: 210 nm, 4 nm

Results

| Retention Time | Area      | Area Percent |
|----------------|-----------|--------------|
| 10,82          | 9031039   | 4,289        |
| 41,05          | 201507233 | 95,711       |

## Absolute configuration analysis

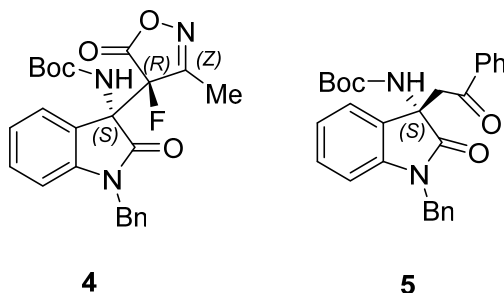

Šebesta and co-workers describe the synthesis of compound **4** [6] with (*S,R*) configuration. They reported chiral HPLC chromatography as follows:

| Authors          | Column                              | Chiral Phase                                                               | Conditions                                                 | Retention times (min)                                  |
|------------------|-------------------------------------|----------------------------------------------------------------------------|------------------------------------------------------------|--------------------------------------------------------|
| Šebesta          | Chiralpak IA                        | Amylose tris-(3,5-dimethylphenylcarbamate) immobilized on SiO <sub>2</sub> | 90:10<br>Hexane/ <i>i</i> PrOH,<br>0.5 mL/min, λ = 210 nm) | t <sub>major</sub> = 21.2<br>t <sub>minor</sub> = 15.2 |
| <b>This work</b> | Phenomenex Lux® <i>i</i> -amylose-1 | Amylose tris-(3,5-dimethylphenylcarbamate) immobilized on SiO <sub>2</sub> | 90:10<br>Hexane/ <i>i</i> PrOH,<br>0.5 mL/min, λ = 210 nm) | t <sub>major</sub> = 27.9<br>t <sub>minor</sub> = 18.5 |

As the stationary phase and HPLC conditions are the same, one can consider that the same enantiomer is obtained. Unfortunately, the authors did not provide the [α]<sub>D</sub> of this compound to be used as further evidence.

On the other hand compounds (*S*)-**5** and (*R*)-**5** have been described by Chimni<sup>[7]</sup> and by Wu and Cao, <sup>[8]</sup> respectively. The absolute stereochemistry of compound **5** obtained in our work was ascertained by comparison of the optical rotation values as well as by comparison of the HPLC chiral chromatography.

| Authors          | Column                              | Chiral Phase                                                               | Conditions                                               | Retention times (min)                                                 |
|------------------|-------------------------------------|----------------------------------------------------------------------------|----------------------------------------------------------|-----------------------------------------------------------------------|
| Wu and Cao       | Chiralpak IA                        | Amylose tris-(3,5-dimethylphenylcarbamate) immobilized on SiO <sub>2</sub> | 80:20<br>Hexane/ <i>i</i> PrOH,<br>1 mL/min, λ = 210 nm) | ( <i>R</i> )<br>t <sub>major</sub> = 8.9<br>t <sub>minor</sub> = 32.9 |
| <b>This work</b> | Phenomenex Lux® <i>i</i> -amylose-1 | Amylose tris-(3,5-dimethylphenylcarbamate) immobilized on SiO <sub>2</sub> | 80:20<br>Hexane/ <i>i</i> PrOH,<br>1 mL/min, λ = 210 nm) | t <sub>major</sub> = 41.0<br>t <sub>minor</sub> = 10.8                |

While the stationary phase and HPLC conditions are the same, one can consider than the opposite enantiomer is obtained.

This can be further proved by checking the specific rotation:

| Authors           | Specific rotation                  | C    | Solvent           | Enantiomer |
|-------------------|------------------------------------|------|-------------------|------------|
| <b>Wu and Cao</b> | $[\alpha]_{\text{D}}^{28} = +52.3$ | 0,34 | CHCl <sub>3</sub> | (R)        |
| <b>Chimni</b>     | $[\alpha]_{\text{D}}^{25} = -50.7$ | 0.1  | CHCl <sub>3</sub> | (S)        |
| <b>This work</b>  | $[\alpha]_{\text{D}}^{25} = -65.7$ | 0,95 | CHCl <sub>3</sub> | (S)        |

## References

- [1] W. Yan, D. Wang, J. Feng, P. Li, D. Zhao, R. Wang, *Org. Lett.* 2012, **14**, 2512–2515.
- [2] N. Capreti, I. D. Jurberg *Org. Lett.* 2015, **17**, 2490–2493.
- [3] T. Hellmuth, W. Frey, R. Peters, *Angew. Chem. Int. Ed.*, 2015, **54**, 2788–2791.
- [4] A. Terent'ev, V. Vil', E. Gorlov, O. Rusina, A. Korlyukov, G. Nikishin, W. Adam *ChemistrySelect* 2017, **2**, 3334–3341.
- [5] W. Yang, D.-M. Du, *Org. Lett.* 2010, **12**, 5450–5453.
- [6] D. Křištofiková, M. Mečiarová, E. Rakovský, R. Šebesta, *ACS Sustainable Chem. Eng.* 2020, **8**, 14417–14424
- [7] J. Kaur, A. Kumari, V. K. Bhardwaj, S. S. Chimni, *Adv. Synth. Catal.* 2017, **359**, 1725–1734.
- [8] C. Cheng, X. Lu, L. Ge, J. Chen, W. Cao, X. X. Wu, G. Zhao, *Org. Chem. Front.* 2017, **4**, 101–114.
